# Supplementary material for: Impact of Meteorology and Aerosol Sources on PM 2.5 and Oxidative Potential Variability and Levels in China
Source: Copernicus journal article supplement (doi:10.5194/egusphere-2023-2615), 2023-12-07
Supplement: Supplementary file 1 [file egusphere-2023-2615-supplement.pdf]

## Supplemental Materials

### Impact of Meteorology and Aerosol Sources on PM<sub>2.5</sub> and Oxidative Potential Variability and Levels in China

5 Jiemei Liu<sup>1,2</sup>, Jesper H. Christensen<sup>2</sup>, Zhuyun Ye<sup>2</sup>, Shikui Dong<sup>1</sup>, Camilla Geels<sup>2</sup>,  
Jørgen Brandt<sup>2</sup>, Athanasios Nenes<sup>3,4</sup>, Yuan Yuan<sup>1,\*</sup>, and Ulas Im<sup>2,\*</sup>

<sup>1</sup> Key Laboratory of Aerospace Thermophysics, Ministry of Industry and Information Technology, Harbin Institute of Technology, 92 West Dazhi Street, Harbin 150001, China

<sup>2</sup> Aarhus University, Department of Environmental Science/Interdisciplinary Centre for Climate Change,  
10 Frederiksborgvej 399, Roskilde, Denmark

<sup>3</sup> Laboratory of Atmospheric Processes and Their Impacts, Ecole Polytechnique Fédérale de Lausanne (EPFL), Lausanne, Switzerland

<sup>4</sup> Center for the Study of Air Quality and Climate Change, Foundation for Research and Technology Hellas (FORTH), Thessaloniki, Greece,

15 **Correspondence:** Yuan Yuan ([yuan yuan83@hit.edu.cn](mailto:yuan yuan83@hit.edu.cn)) and Ulas Im ([ulas@envs.au.dk](mailto:ulas@envs.au.dk))

**Captions of Supplementary Figures**

- 20 Figure S1. Density scatterplots of model performance and validation based on monthly mean observations.

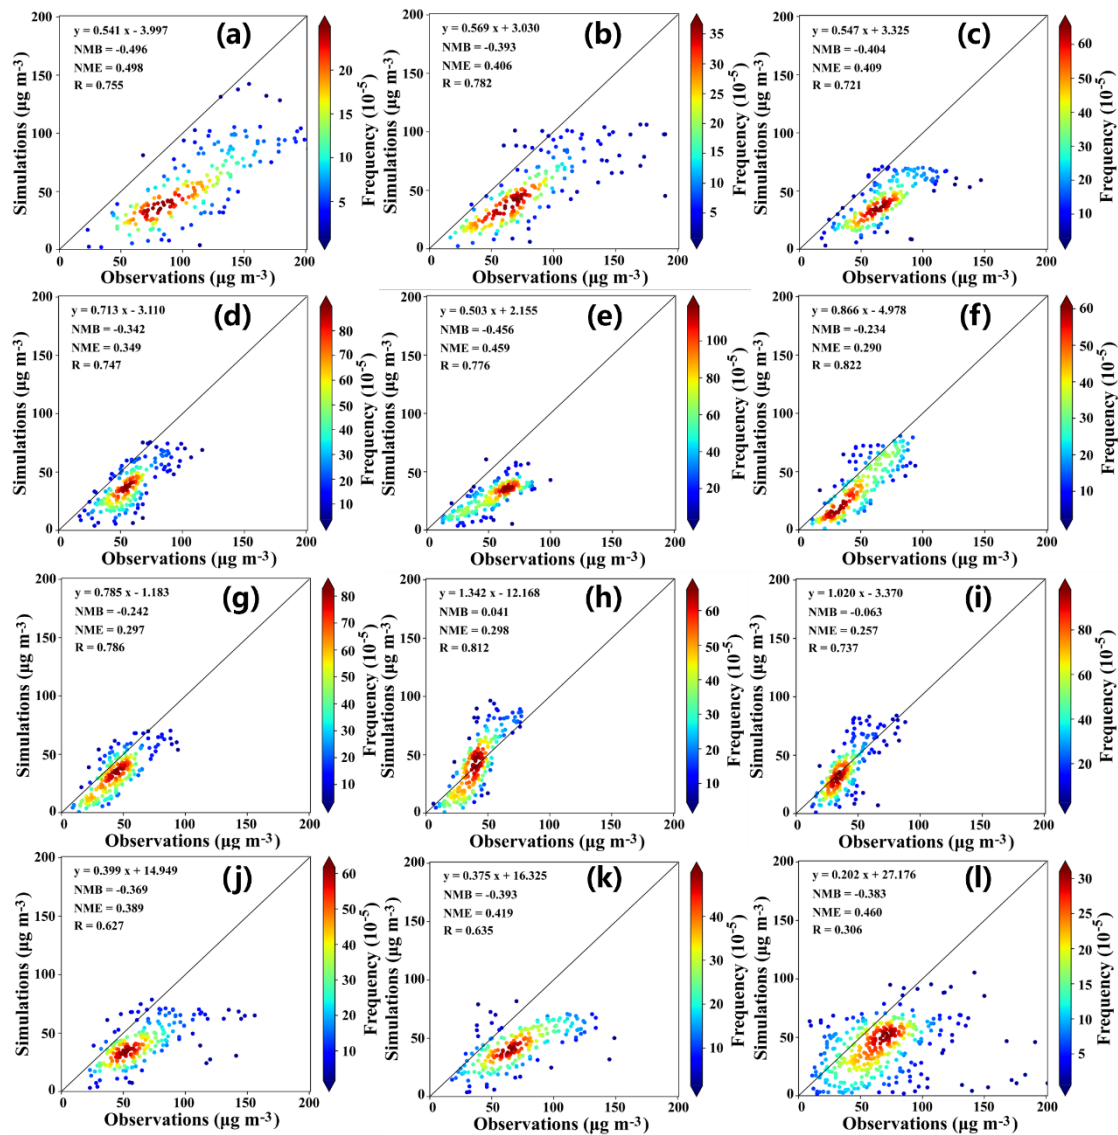

25

Figure S1. Density scatterplots of model performance and validation based on monthly mean observations; (a) to (l) are the results from January to December
