# Supplementary material for: Impact of Meteorology and Aerosol Sources on PM 2.5 and Oxidative Potential Variability and Levels in China
Source: Copernicus journal article supplement (doi:10.5194/egusphere-2023-2615), 2023-12-07
Supplement: Supplementary file [file egusphere-2023-2615-AC1-supplement.pdf]

Manuscript: egosphere-2023-2615

Title: Impact of Meteorology and Aerosol Sources on PM<sub>2.5</sub> and Oxidative Potential Variability and Levels in China

We appreciate all the valuable comments from the reviewers and editor, which significantly improved the quality of the manuscript. We have studied the comments carefully and revised the manuscript accordingly. The comments and our responses point-to-point are listed below. Changes to the paper are shown in blue, so that the reviewers can easily review them again.

Replies to Reviewers and Editor

First of all, we thank both reviewers and editor for their positive and constructive comments and suggestions.

Reviewers' comments:

**RC1:**

In this article Liu et al. use the Danish Eulerian Hemispheric Model (DEHM) to evaluate the oxidative potential (OP) of particulate matter as a function of meteorology and PM source on of aerosols in China.

The author's make use of the parametrization of OP published in 2018 by Liu W. et al. This parametrization is quite simplistic:

$$DTTv = 0.088 \times \text{Coal combustion} + 0.076 \times \text{Biomass burning} + 0.041 \times \text{Secondary source} + 0.034 \times \text{Industry} + 0.017 \times \text{Traffic source}$$
  
(coefficient with a unit of  $\text{nmol} \cdot \text{min}^{-1} \cdot \mu\text{g source}^{-1}$ )

Which is quite convenient for implementing in models.

Using this approach the authors evaluate the importance of different PM sources as well as weather on OP.

The author's approach is valid based on their assumptions. However, it hinges on this parametrization being valid for the entirety of China which may not be the case. In addition, it is known that different SOA subtypes can have varied OP responses (See Liu et al. Environ. Sci. Technol. 2023, 57, 38, 14150–14161) which the authors make no mention of or address in any capacity. This is important considering that SOA is the main source (58%) of OP in this study. While this parametrization cannot possibly represent the different types of SOA and their respective OP, it should be acknowledged in the text as a downside and a target for future measurement campaigns and modeling efforts.

Although these downsides should be discussed in the main article, they do not take away from the results of this work which I believe are novel and useful.

As for technical aspects, the authors describe their methods in a complete manner, clearly cite relevant sources, and use an appropriate title and abstract. The paper is well structured and easy to read and most of the data necessary for interpretation is included in the main text. It can be published after a discussion of the weaknesses of the implemented parametrization.

**Response:** Thank you very much for your acknowledgement and valuable comments. As you mentioned, the parameterization of OP may have different responses across different regions of China and various subtypes of

SOA. A comprehensive discussion of these aspects in the main text would enhance the completeness of the current study and facilitate further advancements in OP research in the future. Following your advice, we have added a section titled “Uncertainty of OP estimates” in the main text, which elaborates the limitations and uncertainty of the OP estimation method proposed in this study in detail (**Please see Pages 24-26**).

The detailed revisions in the manuscript are shown below:

### “3.5 Uncertainty of OP estimates

OP is considered an important indicator of PM<sub>2.5</sub> toxicity and is associated with adverse health effects. Linking the predicted health effects of aerosols to OP may be more relevant than considering PM<sub>2.5</sub> mass alone (Alwadei et al., 2020). However, previous studies of OP in China have mainly focused on local areas, and OP and its source are very different in space and time (Wen et al., 2023), which makes the health research of OP challenging. At present, there are two kinds of methods for evaluating OP of PM<sub>2.5</sub>: cellular method and non-cellular method. The reproducibility of cellular methods is poor, and it is difficult to achieve a large sample size analysis. And the choice of cell type or cell line can significantly affect the OP results (Xing et al., 2023). The non-cellular method has the advantages of fast speed, simple operation, high reproducibility, and low cost. The most common non-cellular methods are DTT, AA, GSH, and 2', 7' -dichlorofluorescein (DCFH) assays (Pietrogrande et al., 2019). However, standardized experimental methods for evaluating OP have not been established (Song et al., 2021), and it is difficult to provide more consistent data on OP across samples at different locations and times. Moreover, each non-cellular OP assay is specific for ROS, making none of the methods used as a standard method for assessing the toxicity of environmental particles. Several studies have used a multi-measure approach to compensate for the specificity of a single probe response to ROS (Calas et al., 2018; Puthussery et al., 2020; Yu et al., 2021; Xu et al., 2021). Xu et al. (2021) used three measurement methods (OP<sup>DTT</sup>, OP<sup>AA</sup>, and OP<sup>GSH</sup>) to estimate the Canadian annual mean OP and found that the sensitivity of the three methods to different components varied widely. Choosing a variety of methods for OP measurement can lead to more comprehensive results, but it can also lead to a significant increase in workload.

For this, we propose a hybrid approach combining existing observations of OP with the CTM. So, using OP from assays and their observed links to sources and chemical constituents can then be parameterized and implemented in CTM for a comprehensive assessment of OP exposure over large areas and time periods. The method considers the seasonal characteristics of the chemical composition of PM<sub>2.5</sub> and the DTT activity measurement of PM<sub>2.5</sub>. A positive matrix factorization (PMF) model and multiple linear regression (MLR) model were used to quantify the contribution of PM<sub>2.5</sub> emission sources to OP (the volume-normalized DTT activity, DTT<sub>v</sub>). The normalized regression equation in this study provides the sensitivity of OP to each identified source. The advantage is that directly applying predicted and readily available PM<sub>2.5</sub> data makes it easy to estimate the OP and assess health risks over large regions and across time and space. This approach enables the exploration of spatial and seasonal variations in aerosol OP across China, providing insight into the contribution of sources, atmospheric processes, and meteorological conditions. There are some main limitations to this study that may lead to uncertainty in predicting OP outcomes. Firstly, the OP prediction considered is incomplete and does not include all sources of OP. For example, the transportation sector refers only to road transport, excluding emissions from ships and other mobile sources. And the transportation sector only considers tailpipe emissions in traffic. These lead to some OP uncertainties. Additionally, this study only considers the intrinsic OP of total SOA due to limited long-term measurements of SOA. Different types of SOA may exhibit varied OP responses due to differences in their sources, formation pathways, and chemical compositions. Aging and fresh SOA may also exhibit varying toxicities (Liu et al., 2023). In future research, efforts should be made to comprehensively collect PM<sub>2.5</sub> samples from various sources and fully explore the potential relationships between OP and PM<sub>2.5</sub> components/sources to further improve OP prediction models and reduce prediction uncertainties. Secondly, the OP prediction model

adopted in this paper is based on Liu et al. (2018). The data samples are from DTT experimental measurements conducted in various coastal cities and from different emission sources, with limited data samples. In this study, it is used to predict the OP of cities across the country, which inevitably leads to a slight error in the forecast results. However, due to the spatiotemporal and emission source differences of the data samples were considered, the three cities selected are representative, which reduces the errors caused by the data samples to a certain extent. Thirdly, a significant body of literature also indicates that vertical resolution can reflect atmospheric thermodynamic environments and the evolution processes of mesoscale systems, which are related to the diffusion and transport of PM<sub>2.5</sub>. Insufficient vertical resolution can hinder the accurate prediction of PM<sub>2.5</sub> surface concentrations (HARA, 2011; Li et al., 2022; Li et al., 2023). Therefore, the configuration of the DEHM model (e.g., vertical resolution) also introduces uncertainties to this study. In conclusion, the results calculated by the method proposed in this study are compared with the existing measurement data (Liu et al., 2014; Liu et al., 2018; Wang et al., 2019), and a good agreement is observed. For instance, through DTT measurements, Zhang et al. (2023) reported an average  $OP^{DTTV}$  of  $1.33 \text{ nmol min}^{-1} \text{ m}^{-3}$  from January 2020 to June 2021 in downtown Nanjing, located in the YRD region of China, with a range of  $0.82\sim 2.08 \text{ nmol min}^{-1} \text{ m}^{-3}$ . This is close to our estimated results (Liu et al., 2024) for the YRD region, where the annual mean OP during 2010-2014 was  $1.56 \text{ nmol min}^{-1} \text{ m}^{-3}$ , and the annual mean OP for 2020 under two emission reduction scenarios were  $1.36 \text{ nmol min}^{-1} \text{ m}^{-3}$  and  $1.25 \text{ nmol min}^{-1} \text{ m}^{-3}$ , respectively. The relative errors for the two scenarios were 2.3% and 6.0%. Another study (Liu et al., 2020) investigating the OP of PM<sub>2.5</sub> in Wuhan, located in the CC region, reported a mean  $OP^{DTTV}$  of  $1.8 \text{ nmol min}^{-1} \text{ m}^{-3}$  for the summer of 2012 in downtown Wuhan. This aligns closely with our estimated results (Liu et al., 2024) for the CC region ( $1.73 \text{ nmol min}^{-1} \text{ m}^{-3}$ ), with a relative error of 3.9%. Therefore, the method proposed in this study is reliable. The proposed method provides a possibility to solve the difficulty and high cost of OP measurement.” (Please see Pages 24-26)

- Alwadei, M., Thomson, S., Kramer, L., Shi, Z., Bloss, W., (2020). Oxidative Potential of PM<sub>2.5</sub> in Dammam, Saudi Arabia, and the effect of dust storms.
- Calas, A., Uzu, G., Kelly, F.J., Houdier, S., Martins, J.M.F., Thomas, F., Molton, F., Charron, A., Dunster, C., Oliete, A., Jacob, V., Besombes, J.L., Chevrier, F., Jaffrezo, J.L. (2018). Comparison between five acellular oxidative potential measurement assays performed with detailed chemistry on PM<sub>10</sub> samples from the city of Chamonix (France). *Atmos Chem Phys*, 18, 7863-7875. <https://doi.org/10.5194/acp-18-7863-2018>.
- Liu, F., Joo, T., Ditto, J.C., Saavedra, M.G., Takeuchi, M., Boris, A.J., Yang, Y., Weber, R.J., Dillner, A.M., Gentner, D.R., Ng, N.L. (2023). Oxidized and Unsaturated: Key Organic Aerosol Traits Associated with Cellular Reactive Oxygen Species Production in the Southeastern United States. *Environ Sci Technol*, 57, 14150-14161. <https://doi.org/10.1021/acs.est.3c03641>.
- Liu, J., Ye, Z., Christensen, J.H., Dong, S., Geels, C., Brandt, J., Nenes, A., Yuan, Y., Im, U. (2024). Impact of anthropogenic emission control in reducing future PM<sub>2.5</sub> concentrations and the related oxidative potential across different regions of China. *Sci Total Environ*, 918, 170638. <https://doi.org/10.1016/j.scitotenv.2024.170638>.
- Liu, Q., Baumgartner, J., Zhang, Y., Liu, Y., Sun, Y., Zhang, M. (2014). Oxidative Potential and Inflammatory Impacts of Source Apportioned Ambient Air Pollution in Beijing. *Environ Sci Technol*, 48, 12920-12929. <https://doi.org/10.1021/es5029876>.
- Liu, Q., Lu, Z., Xiong, Y., Huang, F., Zhou, J., Schauer, J.J. (2020). Oxidative potential of ambient PM<sub>2.5</sub> in Wuhan and its comparisons with eight areas of China. *Sci Total Environ*, 701, 134844. <https://doi.org/10.1016/j.scitotenv.2019.134844>.
- Liu, W., Xu, Y., Liu, W., Liu, Q., Yu, S., Liu, Y., Wang, X., Tao, S. (2018). Oxidative potential of ambient PM<sub>2.5</sub> in the coastal cities of the Bohai Sea, northern China: Seasonal variation and source apportionment. *Environ Pollut*, 236, 514-528. <https://doi.org/10.1016/j.envpol.2018.01.116>.
- Pietrogrande, M.C., Russo, M., Zagatti, E. (2019). Review of PM Oxidative Potential Measured with Acellular

- Assays in Urban and Rural Sites across Italy. *Atmosphere (Basel)*, 10, 626. <https://doi.org/10.3390/atmos10100626>.
- Puthussery, J.V., Singh, A., Rai, P., Bhattu, D., Kumar, V., Vats, P., Furger, M., Rastogi, N., Slowik, J.G., Ganguly, D., Prevot, A.S.H., Tripathi, S.N., Verma, V. (2020). Real-Time Measurements of PM<sub>2.5</sub> Oxidative Potential Using a Dithiothreitol Assay in Delhi, India. *Environ Sci Technol Lett*, 7, 504-510. <https://doi.org/10.1021/acs.estlett.0c00342>.
- Song, M., Oh, S., Park, C., Bae, M. (2021). analytical procedure for dithiothreitol-based oxidative potential of PM<sub>2.5</sub>. *Asian J Atmos Environ*, 15, 2021015. <https://doi.org/10.5572/ajae.2021.015>.
- Wang, J., Lin, X., Lu, L., Wu, Y., Zhang, H., Lv, Q., Liu, W., Zhang, Y., Zhuang, S. (2019b). Temporal variation of oxidative potential of water soluble components of ambient PM<sub>2.5</sub> measured by dithiothreitol (DTT) assay. *Sci Total Environ*, 649, 969-978. <https://doi.org/10.1016/j.scitotenv.2018.08.375>.
- Wen, W., Hua, T., Liu, L., Liu, X., Ma, X., Shen, S., Deng, Z. (2023). Oxidative Potential Characterization of Different PM<sub>2.5</sub> Sources and Components in Beijing and the Surrounding Region. *Int J Environ Res Public Health*, 20, 5109. <https://doi.org/10.3390/ijerph20065109>.
- Xing, C., Wang, Y., Yang, X., Zeng, Y., Zhai, J., Cai, B., Zhang, A., Fu, T., Zhu, L., Li, Y., Wang, X., Zhang, Y. (2023). Seasonal variation of driving factors of ambient PM<sub>2.5</sub> oxidative potential in Shenzhen, China. *Sci Total Environ*, 862, 160771. <https://doi.org/10.1016/j.scitotenv.2022.160771>.
- Xu, J., Martin, R.V., Evans, G.J., Umbrio, D., Traub, A., Meng, J., van Donkelaar, A., You, H., Kulka, R., Burnett, R.T., Godri Pollitt, K.J., Weichenthal, S. (2021). Predicting Spatial Variations in Multiple Measures of Oxidative Burden for Outdoor Fine Particulate Air Pollution across Canada. *Environ Sci Technol*, 55, 9750-9760. <https://doi.org/10.1021/acs.est.1c01210>.
- Yu, H., Puthussery, J.V., Wang, Y., Verma, V. (2021). Spatiotemporal variability in the oxidative potential of ambient fine particulate matter in the Midwestern United States. *Atmos Chem Phys*, 21, 16363-16386. <https://doi.org/10.5194/acp-21-16363-2021>.
- Zhang, L., Hu, X., Chen, S., Chen, Y., Lian, H. (2023). Characterization and source apportionment of oxidative potential of ambient PM<sub>2.5</sub> in Nanjing, a megacity of Eastern China. *Env Pollut Bioavail*, 35, 2175728. <https://doi.org/10.1080/26395940.2023.2175728>.

## RC2:

Review of “Impact of Meteorology and Aerosol Sources on PM<sub>2.5</sub> and Oxidative Potential Variability and Levels in China” by Liu et al.

The paper describes model calculations of PM<sub>2.5</sub> and oxidative potential, which provides information on the impact of PM<sub>2.5</sub> on human health. The paper examines the role of meteorology and anthropogenic emissions on PM<sub>2.5</sub> concentrations and oxidative potential, finding that meteorological factors contribute more to the predicted surface PM<sub>2.5</sub> concentrations and oxidative potential than anthropogenic emissions.

There have been many studies investigating PM<sub>2.5</sub> distributions across China, but what is new here is taking those PM<sub>2.5</sub> concentrations and estimating the oxidative potential. The results presented in this paper are not especially novel but give an incremental advancement in connecting air pollution dominated by particulate matter to human health. Like many papers, there is much to be clarified in the methodology and interpretation of results. However, a major need of the paper is a discussion of the uncertainties in the results and conclusions. In a sense, the authors address a couple of those uncertainties by performing simulations with different meteorology and different anthropogenic emissions. However, there is no discussion of the uncertainties associated with the assumptions made in their approach.

### Major Comments

1. It would be good to see more explanation of what oxidative potential means. What does a value of 2 nmol/min/m<sup>3</sup> imply? Oxidative potential is defined as “the ability of PM<sub>2.5</sub> to produce reactive oxygen species (ROS) to *in-vitro* that consume intracellular antioxidants”. The part in quotes is from line 41 of the paper and does not fully make sense to me. Is it meant that reactive oxygen species consume intracellular antioxidants as observed in lab studies? Does an oxidative potential mean that 2 nmol/m<sup>3</sup> of ROS are reproduced per minute? Is that a lot? Are there thresholds for high oxidative potential versus low oxidative potential?

I found a much clearer explanation of oxidative potential in Yang et al. (2021). I suggest revising the Introduction of this paper to present a clearer explanation, especially for readers who have not learned about oxidative potential yet.

**Response:** Thank you very much for your constructive comments. The comments have been answered in detail in the following order:

**First**, the ambient PM<sub>2.5</sub> OP can be evaluated by the determination of dithiothreitol (DTT) consumption rates. Oxidative potential of PM<sub>2.5</sub> was detected by DTT assay, which estimates the redox activity of PM<sub>2.5</sub> by detecting the ability of the particulate redox active compounds to catalyze the transfer of electrons from DTT to oxygen. Hence, the DTT consumption rate is proportional to the concentration of redox active compounds in the PM<sub>2.5</sub> extracts. Volume-normalized OP (OP<sub>v</sub>) was the rate of DTT consumed per minute per volume of air ( $\text{nmol min}^{-1} \text{m}^{-3}$ ). Following your suggestion, we have provided a clearer explanation in the Introduction (**Please see Page 3**).

**Second**, the value in  $\text{nmol min}^{-1} \text{m}^{-3}$  represents the rate at which DTT is consumed per minute per volume of air. This study characterizes the distribution characteristics of OP across different regions of China using probability density functions. It was found that 35% of regions in China had an OP below 1  $\text{nmol min}^{-1} \text{m}^{-3}$ , 41% of regions had an OP between 1  $\text{nmol min}^{-1} \text{m}^{-3}$  and 2  $\text{nmol min}^{-1} \text{m}^{-3}$ , and 23%

had an OP higher than  $2.00 \text{ nmol min}^{-1} \text{ m}^{-3}$ . This indicates that in 23% of regions in China, the rate of DTT consumption per volume of air exceeds  $2.00 \text{ nmol}$ . Liu et al. (2020) summarized OP measurements conducted in nine regions of China around 2014. The results showed that the average OP content in northern Beijing was highest during the winter of 2016 ( $\sim 14.0 \text{ nmol min}^{-1} \text{ m}^{-3}$ ), while the average OP level in Shanghai during the spring of 2016 was lowest ( $\sim 0.15 \text{ nmol min}^{-1} \text{ m}^{-3}$ ). Therefore, an OP of  $2.00 \text{ nmol min}^{-1} \text{ m}^{-3}$  may not be considered high. Currently, there are no reported thresholds for high or low OP levels. Similar to  $\text{PM}_{2.5}$  concentrations, there may exist a threshold for OP, beyond which exposure could pose a threat to human health. Exploring the OP threshold will be our future endeavor.

The detailed revisions in the manuscript are shown below:

### Introduction (Page 3):

“Many recent studies have suggested that the oxidative potential (OP) of  $\text{PM}_{2.5}$  may better explain the negative impact of  $\text{PM}_{2.5}$  exposure on human health than the well-established metric of mass concentrations (Yu et al., 2019; Gao et al., 2020). OP refers to the ability of  $\text{PM}_{2.5}$  to induce oxidative stress (OS) (Yang et al., 2021).”

Gao, D., Pollitt, K., Mulholland, J.A., Russell, A.G., Weber, R.J. (2020). Characterization and comparison of  $\text{PM}_{2.5}$  oxidative potential assessed by two acellular assays. *Atmos Chem Phys*, 20, 5197-5210. <https://doi.org/10.5194/acp-20-5197-2020>.

Yang, F., Liu, C., Qian, H. (2021). Comparison of indoor and outdoor oxidative potential of  $\text{PM}_{2.5}$ : pollution levels, temporal patterns, and key constituents. *Environ Int*, 155, 106684. <https://doi.org/10.1016/j.envint.2021.106684>.

Yu, S., Liu, W., Xu, Y., Yi, K., Zhou, M., Tao, S., Liu, W. (2019). Characteristics and oxidative potential of atmospheric  $\text{PM}_{2.5}$  in Beijing: Source apportionment and seasonal variation. *Sci Total Environ*, 650, 277-287. <https://doi.org/10.1016/j.scitotenv.2018.09.021>.

Liu, Q., Lu, Z., Xiong, Y., Huang, F., Zhou, J., Schauer, J.J. (2020). Oxidative potential of ambient  $\text{PM}_{2.5}$  in Wuhan and its comparisons with eight areas of China. *Sci Total Environ*, 701, 134844. <https://doi.org/10.1016/j.scitotenv.2019.134844>.

2. The paper quantifies the annual average  $\text{PM}_{2.5}$  concentrations and oxidative potential for all of China and then discusses the spatial distribution of these parameters using maps. Distinct regions are noted in the spatial distribution discussion that I advocate should be quantified on a regional scale. What I mean by “quantify” is to provide average values of  $\text{PM}_{2.5}$  and OP for each region as was done in Figure 9a. The authors are the better experts to distinguish these regions, but what stands out in Figure 6 are these regions: northeast China, central and southeast China, southern portion of western China, and northwest China. As northwest China has the poorest agreement with observations, I suggest treating that region separately from the other regions in China.

**Response:** Thank you very much for your constructive comments. As you mentioned, this study discussed the spatial distribution of  $\text{PM}_{2.5}$  and OP using maps. The study divided China into four economic regions: Northeast (including Liaoning, Jilin, and Heilongjiang provinces), Central (including Shanxi, Anhui, Jiangxi, Henan, Hubei, and Hunan provinces), East (including Beijing, Tianjin, Hebei, Shanghai, Jiangsu, Zhejiang, Fujian, Shandong, Guangdong, Hainan, Hong Kong, Macau, and Taiwan; it is noteworthy that the eastern region in this study includes the regions of Hong Kong, Macau, and Taiwan), and West (including Inner Mongolia, Guangxi, Chongqing, Sichuan, Guizhou, Yunnan, Tibet, Shaanxi, Gansu, Qinghai, Ningxia, and Xinjiang Autonomous Region, and municipalities directly under the central government). These four regions were evaluated in the model, revealing falling within an acceptable simulated bias in most areas of Northeast, Central, East China, and Western regions. Although it may be beneficial to separate the Northwestern region of China from the others, considering the limited availability of monitoring station data in the Western region,

even dividing the Western region into Southwest and Northwest regions may not substantially improve the evaluation. Furthermore, the Western region has lower population density and anthropogenic emissions compared to the other three regions, resulting in less pronounced impacts on PM<sub>2.5</sub> and OP. Therefore, the bias resulting from this discrepancy can be deemed acceptable. Overall, this study considers the division into Northeast, Central, East, and West regions as reasonable. To further characterize the spatial distribution, quantification of the spatial distribution on a regional scale, as you suggested, is necessary. Therefore, this study quantifies PM<sub>2.5</sub> and OP for four regions, as shown in Figure 6c (Please see Pages 16-17).

The detailed revisions in the manuscript are shown below:

**Results and discussion:**

“To learn about the spatial distributions of PM<sub>2.5</sub> concentrations and OP, we plot maps of surface PM<sub>2.5</sub> and OP for scenario C<sub>1</sub> (Figure 6a and 6b) and quantified the average annual PM<sub>2.5</sub> concentrations and OP across different regions of China (Figure 6c). Figure 6d depicted the geographical location of the study area. High PM<sub>2.5</sub> concentrations and High OP are mainly located in central and eastern urban clusters. Low PM<sub>2.5</sub> concentrations and Low OP are mainly distributed in northeastern and western China. The results in Figure 6c indicated that the annual average PM<sub>2.5</sub> concentrations/OP in eastern, central, northeastern, and western China are 33  $\mu\text{g m}^{-3}$  /1.4  $\text{nmol min}^{-1} \text{m}^{-3}$ , 46  $\mu\text{g m}^{-3}$  /2.0  $\text{nmol min}^{-1} \text{m}^{-3}$ , 19  $\mu\text{g m}^{-3}$  /0.8  $\text{nmol min}^{-1} \text{m}^{-3}$ , and 12  $\mu\text{g m}^{-3}$  /0.5  $\text{nmol min}^{-1} \text{m}^{-3}$ , respectively.” (Page 16)

“

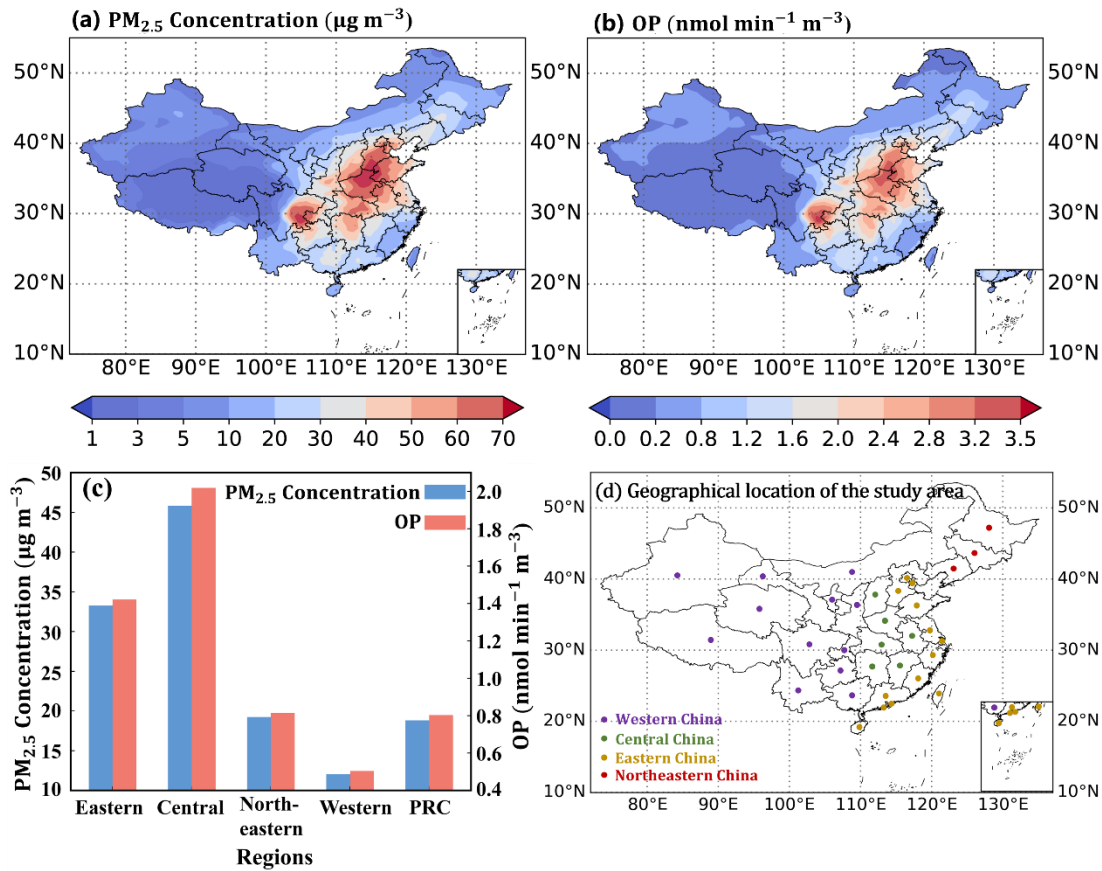

Figure 6. Spatial clustering of annual mean PM<sub>2.5</sub> concentrations (a) and annual mean OP (b) in China, annual mean PM<sub>2.5</sub> concentrations and annual mean OP (c) in different regions of China in 2014 under scenario C<sub>1</sub>, and geographical location of the study area (d); the central region of China comprises Shanxi, Anhui, Jiangxi, Henan, Hubei, and Hunan provinces; the eastern region of China comprises Beijing, Tianjin, Hebei, Shanghai,

Jiangsu, Zhejiang, Fujian, Shandong, Guangdong, Hainan, Hong Kong, Macao, and Taiwan; It should be noted that the eastern region in this study includes Hong Kong, Macao and Taiwan; the western region of China consists of twelve provinces (autonomous regions and municipalities): Inner Mongolia, Guangxi, Chongqing, Sichuan, Guizhou, Yunnan, Tibet, Shaanxi, Gansu, Qinghai, Ningxia and Xinjiang; the northeastern region of China comprises Liaoning, Jilin and Heilongjiang provinces.” (Page 17)

3. The seasonality evaluation plots were interesting and point to good agreement during April – September and poorer agreement during the winter months. I suggest that the authors also separate their analysis between summer, when there is more confidence in the model results, and winter.

**Response:** Thank you very much for your constructive comments. In the model evaluation, we discussed the model performance from both spatial and temporal perspectives to comprehensively assess DEHM’s ability to simulate PM<sub>2.5</sub> in China. While seasonal discussions could provide clearer assessments of PM<sub>2.5</sub> and OP levels in each season, this study focuses on the annual contributions of meteorological conditions and anthropogenic emissions to PM<sub>2.5</sub> concentrations and OP, aiming for an overall assessment over the entire year. Therefore, evaluating the model based on annual average data provides a good overall assessment. Building upon this, we conducted a quantitative assessment of the spatial distribution characteristics and driving factors based on annual average data, exploring the spatial distribution of PM<sub>2.5</sub> and OP in China, as well as the impacts of meteorological conditions and anthropogenic emissions on both. The monthly and seasonal distributions of PM<sub>2.5</sub> and OP that you mention are also the focus of our other study, which we will expand on in more detail there.

4. What role does PM<sub>2.5</sub> from outside China have on PM<sub>2.5</sub> concentrations and oxidation potential? For example, does biomass burning PM<sub>2.5</sub> from Russia affect PM<sub>2.5</sub> in China?

**Response:** Thank you very much for your constructive comments. On the issue of the impact of outside China PM<sub>2.5</sub> on China's air quality, existing studies (Xu et al., 2023) have utilized the GEOS-Chem chemical transport model to investigate the influence of foreign anthropogenic emissions (from Asian countries such as Bangladesh, Indonesia, India, Japan, South Korea, Malaysia, Myanmar, the Philippines, Thailand, and Vietnam) on PM<sub>2.5</sub> pollution in China in 2015. They found that, nationwide, foreign anthropogenic emissions in 2015 contributed approximately 2.4  $\mu\text{g m}^{-3}$  to PM<sub>2.5</sub> in China, accounting for 6.2% of the national average PM<sub>2.5</sub> concentration. Specifically, the contribution of foreign anthropogenic emissions was highest in the Eastern region of China (including Anhui, Hebei, Henan, Jiangsu, Liaoning, Shandong, Beijing, and Tianjin), with 5.0  $\mu\text{g m}^{-3}$  of PM<sub>2.5</sub> (8%); prominent cross-border pollution was also observed along the southwestern border of China, particularly affecting Yunnan Province with 4.9  $\mu\text{g m}^{-3}$  of PM<sub>2.5</sub> (18%), primarily originating from South Asia (i.e., India). Thus, outside China emissions have a certain impact on PM<sub>2.5</sub> concentrations in China. Therefore, in this study, the influence of transboundary transport on Chinese PM<sub>2.5</sub> was considered by setting up a research domain with the Northern Hemisphere as the parent domain and China as the nested domain, better representing the transport of pollutants from the Northern Hemisphere to China. However, it is challenging to isolate the impact of transboundary transport on PM<sub>2.5</sub> pollutions in China, and Xu et al. (2023) 's study revealed a relatively minor impact of transboundary transport on PM<sub>2.5</sub> pollutions in China. Therefore, this work did not separately quantify the influence of transboundary transport and focused on exploring the contributions of meteorological conditions and Chinese anthropogenic emissions to PM<sub>2.5</sub> pollutions.

Xu, J.W., Lin, J., Luo, G., Adeniran, J., Kong, H. (2023). Foreign emissions exacerbate PM<sub>2.5</sub> pollution in China through nitrate chemistry. *Atmos Chem Phys*, 23, 4149-4163. <https://doi.org/10.5194/acp-23->



4149-2023.

Sun, L., Yang, L., Wang, D., Zhang, T. (2023). Influence of the Long-Range Transport of Siberian Biomass Burnings on Air Quality in Northeast China in June 2017. *Sensors (Basel)*, 23. <https://doi.org/10.3390/s23020682>.

5. The study uses 50 km × 50 km horizontal grid spacing and 29 vertical levels to 100 hPa. What impact does this rather coarse resolution have on the results presented? For example, are the urban regions and their emissions well represented or do the emissions and concentrations get diluted by placing them in a grid box bigger than the urban region? Likewise, does the vertical resolution impact the prediction of the boundary layer height affecting the estimated surface concentrations of PM<sub>2.5</sub>? Please add a section discussing uncertainties in the study's results including the choice of the model configuration and other assumptions as noted below in the specific comments.

**Response:** Thank you very much for your constructive comments. The horizontal resolution of 50 km x 50 km used in the nested domain of this study can be considered appropriate. Firstly, previous studies on the distribution of air pollutants and meteorological parameters in urban areas of China have utilized resolutions of 50 km × 50 km (Dai et al., 2021; Wang et al., 2013) or coarser (Gao et al., 2018), with their results indicating that this resolution is sufficient for simulating the distribution of air pollutants and meteorological parameters. Secondly, the validation results of the PM<sub>2.5</sub> prediction model in this study also support this point. Although the regions defined in this study (such as Eastern, Central, Western, and Northeast China) are smaller compared to the entire country, each region still encompasses numerous model grid cells, allowing for the representation of specific characteristics of each area. Therefore, the horizontal resolution of 50 km × 50 km adopted in this study is deemed appropriate. Additionally, vertical resolution affects the prediction of boundary layer height, and a significant body of literature also indicates that vertical resolution can reflect atmospheric thermodynamic environments and the evolution processes of mesoscale systems, which are related to the diffusion and transport of PM<sub>2.5</sub>. Insufficient vertical resolution can hinder the accurate prediction of PM<sub>2.5</sub> surface concentrations (Zhang et al., 2023). Considering this aspect and in line with existing literature (MEE, 2013; Gao et al., 2018), this study configured 29 uneven layers for vertical distribution, with the highest layer reaching 100 hPa and the lowest layer at approximately 20 meters in height. The model evaluation results in Section 3.1 demonstrate that the model and its associated configurations can still predict PM<sub>2.5</sub> levels in various regions of China effectively. To further enhance the rigor of the study results, this study has incorporated discussions on the uncertainties related to model configurations and vertical resolution, as per your suggestion (**Please see Pages 24-26**).

Dai, T., Cheng, Y., Goto, D., Li, Y., Tang, X., Shi, G., Nakajima, T. (2021). Revealing the sulfur dioxide emission reductions in China by assimilating surface observations in WRF-Chem. *Atmos Chem Phys*, 21, 4357-4379. <https://doi.org/10.5194/acp-21-4357-2021>.

Gao, M., Beig, G., Song, S., Zhang, H., Hu, J., Ying, Q., Liang, F., Liu, Y., Wang, H., Lu, X., Zhu, T., Carmichael, G.R., Nielsen, C.P., McElroy, M.B. (2018). The impact of power generation emissions on ambient PM<sub>2.5</sub> pollution and human health in China and India. *Environ Int*, 121, 250-259. <https://doi.org/10.1016/j.envint.2018.09.015>.

MEE. (2013). Technical guide for source analysis of atmospheric particulate matter. <https://www.mee.gov.cn/gkml/hbb/bwj/201308/W020130820340683623095.pdf>. Accessed 11 January, 2023.

Wang, S., Yu, E. (2013). Simulation and projection of changes in rainy season precipitation over China using the WRF model. *Acta Meteorologica Sinica*, 27, 577-584. <https://www.cma.gov.cn/en/NewsReleases/MetInstruments/201308/P020130815575473012331.pdf>.

Zhang, T., Zhang, R., Zhong, J., Shen, X., Wang, Y., Guo, L. (2023). Classification and estimation of unfavourable boundary-layer meteorological conditions in Beijing for PM<sub>2.5</sub> concentration changes using vertical meteorological profiles. *Atmos Res*, 293, 106902. <https://doi.org/10.1016/j.atmosres.2023.106902>.

The detailed revisions in the manuscript are shown below:

### “3.5 Uncertainty of OP estimates

OP is considered an important indicator of PM<sub>2.5</sub> toxicity and is associated with adverse health effects. Linking the predicted health effects of aerosols to OP may be more relevant than considering PM<sub>2.5</sub> mass alone (Alwadei et al., 2020). However, previous studies of OP in China have mainly focused on local areas, and OP and its source are very different in space and time (Wen et al., 2023), which makes the health research of OP challenging. At present, there are two kinds of methods for evaluating OP of PM<sub>2.5</sub>: cellular method and non-cellular method. The reproducibility of cellular methods is poor, and it is difficult to achieve a large sample size analysis. And the choice of cell type or cell line can significantly affect the OP results (Xing et al., 2023). The non-cellular method has the advantages of fast speed, simple operation, high reproducibility, and low cost. The most common non-cellular methods are DTT, AA, GSH, and 2', 7' -dichlorofluorescein (DCFH) assays (Pietrogrande et al., 2019). However, standardized experimental methods for evaluating OP have not been established (Song et al., 2021), and it is difficult to provide more consistent data on OP across samples at different locations and times. Moreover, each non-cellular OP assay is specific for ROS, making none of the methods used as a standard method for assessing the toxicity of environmental particles. Several studies have used a multi-measure approach to compensate for the specificity of a single probe response to ROS (Calas et al., 2018; Puthussery et al., 2020; Yu et al., 2021; Xu et al., 2021). Xu et al. (2021) used three measurement methods (OP<sup>DTT</sup>, OP<sup>AA</sup>, and OP<sup>GSH</sup>) to estimate the Canadian annual mean OP and found that the sensitivity of the three methods to different components varied widely. Choosing a variety of methods for OP measurement can lead to more comprehensive results, but it can also lead to a significant increase in workload.

For this, we propose a hybrid approach combining existing observations of OP with the CTM. So, using OP from assays and their observed links to sources and chemical constituents can then be parameterized and implemented in CTM for a comprehensive assessment of OP exposure over large areas and time periods. The method considers the seasonal characteristics of the chemical composition of PM<sub>2.5</sub> and the DTT activity measurement of PM<sub>2.5</sub>. A positive matrix factorization (PMF) model and multiple linear regression (MLR) model were used to quantify the contribution of PM<sub>2.5</sub> emission sources to OP (the volume-normalized DTT activity, DTT<sub>v</sub>). The normalized regression equation in this study provides the sensitivity of OP to each identified source. The advantage is that directly applying predicted and readily available PM<sub>2.5</sub> data makes it easy to estimate the OP and assess health risks over large regions and across time and space. This approach enables the exploration of spatial and seasonal variations in aerosol OP across China, providing insight into the contribution of sources, atmospheric processes, and meteorological conditions. There are some main limitations to this study that may lead to uncertainty in predicting OP outcomes. Firstly, the OP prediction considered is incomplete and does not include all sources of OP. For example, the transportation sector refers only to road transport, excluding emissions from ships and other mobile sources. And the transportation sector only considers tailpipe emissions in traffic. These lead to some OP uncertainties. Additionally, this study only considers the intrinsic OP of total SOA due to limited long-term measurements of SOA. Different types of SOA may exhibit varied OP responses due to differences in their sources, formation pathways, and chemical compositions. Aging and fresh SOA may also exhibit varying toxicities (Liu et al., 2023). In future research, efforts should be made to comprehensively collect PM<sub>2.5</sub> samples from various sources and fully explore the potential relationships between OP and PM<sub>2.5</sub> components/sources to further improve OP prediction models

and reduce prediction uncertainties. Secondly, the OP prediction model adopted in this paper is based on Liu et al. (2018). The data samples are from DTT experimental measurements conducted in various coastal cities and from different emission sources, with limited data samples. In this study, it is used to predict the OP of cities across the country, which inevitably leads to a slight error in the forecast results. However, due to the spatiotemporal and emission source differences of the data samples were considered, the three cities selected are representative, which reduces the errors caused by the data samples to a certain extent. Thirdly, a significant body of literature also indicates that vertical resolution can reflect atmospheric thermodynamic environments and the evolution processes of mesoscale systems, which are related to the diffusion and transport of PM<sub>2.5</sub>. Insufficient vertical resolution can hinder the accurate prediction of PM<sub>2.5</sub> surface concentrations (HARA, 2011; Li et al., 2022; Li et al., 2023). Therefore, the configuration of the DEHM model (e.g., vertical resolution) also introduces uncertainties to this study. In conclusion, the results calculated by the method proposed in this study are compared with the existing measurement data (Liu et al., 2014; Liu et al., 2018; Wang et al., 2019), and a good agreement is observed. For instance, through DTT measurements, Zhang et al. (2023) reported an average  $OP^{DTTv}$  of  $1.33 \text{ nmol min}^{-1} \text{ m}^{-3}$  from January 2020 to June 2021 in downtown Nanjing, located in the YRD region of China, with a range of  $0.82\sim 2.08 \text{ nmol min}^{-1} \text{ m}^{-3}$ . This is close to our estimated results (Liu et al., 2024) for the YRD region, where the annual mean OP during 2010-2014 was  $1.56 \text{ nmol min}^{-1} \text{ m}^{-3}$ , and the annual mean OP for 2020 under two emission reduction scenarios were  $1.36 \text{ nmol min}^{-1} \text{ m}^{-3}$  and  $1.25 \text{ nmol min}^{-1} \text{ m}^{-3}$ , respectively. The relative errors for the two scenarios were 2.3% and 6.0%. Another study (Liu et al., 2020) investigating the OP of PM<sub>2.5</sub> in Wuhan, located in the CC region, reported a mean  $OP^{DTTv}$  of  $1.8 \text{ nmol min}^{-1} \text{ m}^{-3}$  for the summer of 2012 in downtown Wuhan. This aligns closely with our estimated results (Liu et al., 2024) for the CC region ( $1.73 \text{ nmol min}^{-1} \text{ m}^{-3}$ ), with a relative error of 3.9%. Therefore, the method proposed in this study is reliable. The proposed method provides a possibility to solve the difficulty and high cost of OP measurement.” (Please see Pages 24-26)

- Alwadei, M., Thomson, S., Kramer, L., Shi, Z., Bloss, W., (2020). Oxidative Potential of PM<sub>2.5</sub> in Dammam, Saudi Arabia, and the effect of dust storms.
- Calas, A., Uzu, G., Kelly, F.J., Houdier, S., Martins, J.M.F., Thomas, F., Molton, F., Charron, A., Dunster, C., Oliete, A., Jacob, V., Besombes, J.L., Chevrier, F., Jaffrezo, J.L. (2018). Comparison between five acellular oxidative potential measurement assays performed with detailed chemistry on PM<sub>10</sub> samples from the city of Chamonix (France). *Atmos Chem Phys*, 18, 7863-7875. <https://doi.org/10.5194/acp-18-7863-2018>.
- Liu, F., Joo, T., Ditto, J.C., Saavedra, M.G., Takeuchi, M., Boris, A.J., Yang, Y., Weber, R.J., Dillner, A.M., Gentner, D.R., Ng, N.L. (2023). Oxidized and Unsaturated: Key Organic Aerosol Traits Associated with Cellular Reactive Oxygen Species Production in the Southeastern United States. *Environ Sci Technol*, 57, 14150-14161. <https://doi.org/10.1021/acs.est.3c03641>.
- Liu, J., Ye, Z., Christensen, J.H., Dong, S., Geels, C., Brandt, J., Nenes, A., Yuan, Y., Im, U. (2024). Impact of anthropogenic emission control in reducing future PM<sub>2.5</sub> concentrations and the related oxidative potential across different regions of China. *Sci Total Environ*, 918, 170638. <https://doi.org/10.1016/j.scitotenv.2024.170638>.
- Liu, Q., Baumgartner, J., Zhang, Y., Liu, Y., Sun, Y., Zhang, M. (2014). Oxidative Potential and Inflammatory Impacts of Source Apportioned Ambient Air Pollution in Beijing. *Environ Sci Technol*, 48, 12920-12929. <https://doi.org/10.1021/es5029876>.
- Liu, Q., Lu, Z., Xiong, Y., Huang, F., Zhou, J., Schauer, J.J. (2020). Oxidative potential of ambient PM<sub>2.5</sub> in Wuhan and its comparisons with eight areas of China. *Sci Total Environ*, 701, 134844. <https://doi.org/10.1016/j.scitotenv.2019.134844>.
- Liu, W., Xu, Y., Liu, W., Liu, Q., Yu, S., Liu, Y., Wang, X., Tao, S. (2018). Oxidative potential of ambient

- PM2.5 in the coastal cities of the Bohai Sea, northern China: Seasonal variation and source apportionment. *Environ Pollut*, 236, 514-528. <https://doi.org/10.1016/j.envpol.2018.01.116>.
- Pietrogrande, M.C., Russo, M., Zagatti, E. (2019). Review of PM Oxidative Potential Measured with Acellular Assays in Urban and Rural Sites across Italy. *Atmosphere (Basel)*, 10, 626. <https://doi.org/10.3390/atmos10100626>.
- Puthussery, J.V., Singh, A., Rai, P., Bhattu, D., Kumar, V., Vats, P., Furger, M., Rastogi, N., Slowik, J.G., Ganguly, D., Prevot, A.S.H., Tripathi, S.N., Verma, V. (2020). Real-Time Measurements of PM2.5 Oxidative Potential Using a Dithiothreitol Assay in Delhi, India. *Environ Sci Technol Lett*, 7, 504-510. <https://doi.org/10.1021/acs.estlett.0c00342>.
- Song, M., Oh, S., Park, C., Bae, M. (2021). analytical procedure for dithiothreitol-based oxidative potential of PM2.5. *Asian J Atmos Environ*, 15, 2021015. <https://doi.org/10.5572/ajae.2021.015>.
- Wang, J., Lin, X., Lu, L., Wu, Y., Zhang, H., Lv, Q., Liu, W., Zhang, Y., Zhuang, S. (2019b). Temporal variation of oxidative potential of water soluble components of ambient PM2.5 measured by dithiothreitol (DTT) assay. *Sci Total Environ*, 649, 969-978. <https://doi.org/10.1016/j.scitotenv.2018.08.375>.
- Wen, W., Hua, T., Liu, L., Liu, X., Ma, X., Shen, S., Deng, Z. (2023). Oxidative Potential Characterization of Different PM2.5 Sources and Components in Beijing and the Surrounding Region. *Int J Environ Res Public Health*, 20, 5109. <https://doi.org/10.3390/ijerph20065109>.
- Xing, C., Wang, Y., Yang, X., Zeng, Y., Zhai, J., Cai, B., Zhang, A., Fu, T., Zhu, L., Li, Y., Wang, X., Zhang, Y. (2023). Seasonal variation of driving factors of ambient PM2.5 oxidative potential in Shenzhen, China. *Sci Total Environ*, 862, 160771. <https://doi.org/10.1016/j.scitotenv.2022.160771>.
- Xu, J., Martin, R.V., Evans, G.J., Umbrio, D., Traub, A., Meng, J., van Donkelaar, A., You, H., Kulka, R., Burnett, R.T., Godri Pollitt, K.J., Weichenthal, S. (2021). Predicting Spatial Variations in Multiple Measures of Oxidative Burden for Outdoor Fine Particulate Air Pollution across Canada. *Environ Sci Technol*, 55, 9750-9760. <https://doi.org/10.1021/acs.est.1c01210>.
- Yu, H., Puthussery, J.V., Wang, Y., Verma, V. (2021). Spatiotemporal variability in the oxidative potential of ambient fine particulate matter in the Midwestern United States. *Atmos Chem Phys*, 21, 16363-16386. <https://doi.org/10.5194/acp-21-16363-2021>.
- Zhang, L., Hu, X., Chen, S., Chen, Y., Lian, H. (2023). Characterization and source apportionment of oxidative potential of ambient PM2.5 in Nanjing, a megacity of Eastern China. *Env Pollut Bioavail*, 35, 2175728. <https://doi.org/10.1080/26395940.2023.2175728>.

## Specific Science Comments

1. Lines 28-29 of abstract: What is the meaning of OP values? Is 1 nmol/min/m<sup>3</sup> low, and if so, does that mean there is small potential for health risk? Please explain why it is useful to report the numbers.

**Response:** Thank you very much for your constructive comments. The comments have been answered in detail in the following order:

**First**, following your advice, we have added the definition of OP in the abstract (**Please see Page 2**). The ability of inhaled particles to generate ROS can be quantified by their OP, the ability of specific PM components to deplete antioxidants in assays as a proxy of their in vivo effects (Mylonaki et al., 2024).

**Second**, as mentioned before, Liu et al. (2020) reported  $OP^{DTTv}$  values ranging from as high as 14.0  $nmol\ min^{-1}\ m^{-3}$  to as low as 0.15  $nmol\ min^{-1}\ m^{-3}$  across various regions in China. The study (Brehmer et al., 2019) has shown that the range of  $OP^{DTTv}$  in Sichuan is between 8.5  $nmol\ min^{-1}\ m^{-3}$  and 10.9  $nmol\ min^{-1}\ m^{-3}$ , with an average  $OP^{DTTv}$  of 9.6  $nmol\ min^{-1}\ m^{-3}$ ;  $OP^{DTTv}$  values in Beijing ranged from 0.11  $nmol\ min^{-1}\ m^{-3}$  to 0.49  $nmol\ min^{-1}\ m^{-3}$ , with an average  $OP^{DTTv}$  of 0.19  $nmol\ min^{-1}\ m^{-3}$  (Liu et al., 2014);  $OP^{DTTv}$  values in Xi'an ranged from 0.24  $nmol\ min^{-1}\ m^{-3}$  to 1.1  $nmol\ min^{-1}\ m^{-3}$ , with an average  $OP^{DTTv}$  of 0.51  $nmol\ min^{-1}\ m^{-3}$  (Chen et al., 2019);  $OP^{DTTv}$  values in Nanjing ranged from 1.5  $nmol\ min^{-1}\ m^{-3}$  to 3.82  $nmol\ min^{-1}\ m^{-3}$ , with an average  $OP^{DTTv}$  of 2.42  $nmol\ min^{-1}\ m^{-3}$  (Zhang et al., 2023). Based on the existing literature, there are currently no established criteria for classifying OP values as high or low. Therefore, combining the values of OP data from the existing literature, this study attempts to propose several key values for OP delineation from the distribution interval of OP:  $<1\ nmol\ min^{-1}\ m^{-3}$ ,  $1\ nmol\ min^{-1}\ m^{-3}\sim 2\ nmol\ min^{-1}\ m^{-3}$ ,  $>2\ nmol\ min^{-1}\ m^{-3}$ , which corresponds to low, medium, and high, respectively.

**Third**, generally, lower OP values represent a lower risk of exposure to potentially redox-active aerosols (Liu et al., 2020). Therefore, the OP values reported in this study reflect aerosol toxicity.

Brehmer, C., Lai, A., Clark, S., Shan, M., Ni, K., Ezzati, M., Yang, X., Baumgartner, J., Schauer, J.J., Carter, E. (2019). The Oxidative Potential of Personal and Household PM<sub>2.5</sub> in a Rural Setting in Southwestern China. *Environ Sci Technol*, 53, 2788-2798. <https://doi.org/10.1021/acs.est.8b05120>.

Chen, Q., Wang, M., Wang, Y., Zhang, L., Li, Y., Han, Y. (2019). Oxidative Potential of Water-Soluble Matter Associated with Chromophoric Substances in PM<sub>2.5</sub> over Xi'an, China. *Environ Sci Technol*, 53, 8574-8584. <https://doi.org/10.1021/acs.est.9b01976>.

Liu, Q., Baumgartner, J., Zhang, Y., Liu, Y., Sun, Y., Zhang, M. (2014). Oxidative Potential and Inflammatory Impacts of Source Apportioned Ambient Air Pollution in Beijing. *Environ Sci Technol*, 48, 12920-12929. [10.1021/es5029876](https://doi.org/10.1021/es5029876).

Liu, Q., Lu, Z., Xiong, Y., Huang, F., Zhou, J., Schauer, J.J. (2020). Oxidative potential of ambient PM<sub>2.5</sub> in Wuhan and its comparisons with eight areas of China. *Sci Total Environ*, 701, 134844. <https://doi.org/10.1016/j.scitotenv.2019.134844>.

Mylonaki, M., Gini, M., Georgopoulou, M., Pilou, M., Chalvatzaki, E., Solomos, S., Diapouli, E., Giannakaki, E., Lazaridis, M., Pandis, S.N., Nenes, A., Eleftheriadis, K., Papayannis, A. (2024). Wildfire and African dust aerosol oxidative potential, exposure and dose in the human respiratory tract. *Sci Total Environ*, 913, 169683. <https://doi.org/10.1016/j.scitotenv.2023.169683>.

Zhang, L., Hu, X., Chen, S., Chen, Y., Lian, H. (2023). Characterization and source apportionment of oxidative potential of ambient PM<sub>2.5</sub> in Nanjing, a megacity of Eastern China. *Env Pollut Bioavail*, 35, 2175728. <https://doi.org/10.1080/26395940.2023.2175728>.

The detailed revisions in the manuscript are shown below:

**Abstract (Page 2):**

“China has long-term high PM<sub>2.5</sub> levels, and its Oxidative Potential (OP) is worth studying as it may unravel the impacts of aerosol pollution on public health better than PM<sub>2.5</sub> alone. OP refers to the ability of PM<sub>2.5</sub> to induce oxidative stress (OS).”

2. Section 2.2. It was not clear whether DEHM represents any feedbacks of aerosols on meteorology. Could this be clearly explained in the model description.

**Response:** Thank you very much for your constructive comments. In the DEHM model, the meteorological input files required for both Scenario C<sub>1</sub> and Scenario C<sub>2</sub> are generated by the WRF driven by the ERA5 reanalysis dataset. The meteorological input files required for Scenario C<sub>3</sub> are generated by the WRF driven by global meteorological data from the CESM. The anthropogenic emission inventories required for Scenarios C<sub>2</sub> and C<sub>3</sub> are sourced from Eclipse v6b, while the anthropogenic emission inventory required for Scenario C<sub>1</sub> is sourced from EDGAR-HTAP. The model considers surface layer schemes, boundary layer parameterization schemes, cumulus parameterization schemes, longwave radiation schemes, CAM shortwave radiation schemes, gas-phase chemistry schemes, etc. Following your suggestion, we have provided detailed descriptions of the model configurations in Section 2.3 (**Please see Pages 7-8**).

The detailed revisions in the manuscript are shown below:

**Materials and methods (Pages 7-8):**

“The meteorological fields were simulated using the WRF model (Skamarock et al., 2008) with the same domain and resolution driven by global meteorological data obtained from the ERA5 dataset and the Community Earth System Model (CESM) global model, respectively. The simulations utilized the Revised MM5 surface layer scheme, the Yonsei University (YSU) boundary layer parameterization scheme (Hong et al., 2006), the Multi-scale Kain-Fritsch cumulus parameterization scheme (Zheng et al., 2016), the CAM longwave radiation scheme, the CAM shortwave radiation scheme (Skamarock et al., 2021), etc. The gas-phase chemistry module included 66 species, 9 primary particles (including natural particles such as sea salt), and 138 chemical reactions and was based on the scheme by Strand et al. (1994) (Brandt et al., 2012). The gas-phase species considered in this study included SO<sub>2</sub>, NO<sub>2</sub>, CH<sub>4</sub>, C<sub>2</sub>H<sub>6</sub>, etc. PM<sub>2.5</sub> was formed by BC, OC, sea salt, ammonium (NH<sub>4</sub><sup>+</sup>), nitrate (NO<sub>3</sub><sup>-</sup>), sulfate (SO<sub>4</sub><sup>2-</sup>), and secondary organic aerosols (SOA), among others (Frohn et al., 2022). Biogenic volatile organic compounds (BVOCs), such as isoprene, contributed to the formation of SOA (Zare et al., 2012). Further details on the configuration of the chemical scheme and the list of chemical reactions can refer to the literature (Zare et al., 2012; Brandt et al., 2012; Collin, 2020; Frohn et al., 2022). The SOA were calculated using the volatility basis set (see details in Im et al. (2019)). In addition to the anthropogenic emissions, DEHM also includes emissions from biogenic emissions, such as vegetation, sea salt, lightning, soil, etc. The current version of the DEHM model does not include wind-blown, resuspended dust emissions or road dust. The time resolution of the DEHM model output is one hour.”

Brandt, J., Silver, J.D., Frohn, L.M., Geels, C., Gross, A., Hansen, A.B., Hansen, K.M., Hedegaard, G.B., Skjøth, C.A., Villadsen, H., Zare, A., Christensen, J.H. (2012). An integrated model study for Europe and North America using the Danish Eulerian Hemispheric Model with focus on intercontinental transport of air pollution. *Atmos Environ* (1994), 53, 156-176. <https://doi.org/10.1016/j.atmosenv.2012.01.011>.

Collin, G. (2020). Regional Production, Updated documentation covering all Regional operational systems and the ENSEMBLE. [https://atmosphere.copernicus.eu/sites/default/files/2020-01/CAMS50\\_2018SC1\\_D2.0.2-U1\\_Models\\_documentation\\_201910\\_v1.pdf](https://atmosphere.copernicus.eu/sites/default/files/2020-01/CAMS50_2018SC1_D2.0.2-U1_Models_documentation_201910_v1.pdf). Accessed.

- Frohn, L.M., Geels, C., Andersen, C., Andersson, C., Bennet, C., Christensen, J.H., Im, U., Karvosenoja, N., Kindler, P.A., Kukkonen, J., Lopez-Aparicio, S., Nielsen, O., Palamarchuk, Y., Paunu, V., Plejdrup, M.S., Segersson, D., Sofiev, M., Brandt, J. (2022). Evaluation of multidecadal high-resolution atmospheric chemistry-transport modelling for exposure assessments in the continental Nordic countries. *Atmos Environ* (1994), 290, 119334. <https://doi.org/10.1016/j.atmosenv.2022.119334>.
- Hong, S., Noh, Y., Dudhia, J. (2006). A New Vertical Diffusion Package with an Explicit Treatment of Entrainment Processes. *Mon Weather Rev*, 134, 2318-2341. <https://doi.org/10.1175/MWR3199.1>.
- Im, U., Christensen, J.H., Nielsen, O.K., Sand, M., Makkonen, R., Geels, C., Anderson, C., Kukkonen, J., Lopez-Aparicio, S., Brandt, J. (2019). Contributions of Nordic anthropogenic emissions on air pollution and premature mortality over the Nordic region and the Arctic. *Atmos Chem Phys*, 19, 12975-12992. <https://doi.org/10.5194/acp-19-12975-2019>.
- Skamarock, W.C., Klemp, J.B., Dudhia, J., Gill, D.O., Barker, D.M., Duda, M.G., Huang, X., Wang, W., Powers, J.G. (2008). A description of the advanced research WRF version 3. *NCAR technical note*, 475, 113. <http://dx.doi.org/10.5065/D68S4MVH>.
- Skamarock, W.C., Klemp, J.B., Dudhia, J., Gill, D.O., Liu, Z., Berner, J., Huang, X.Y. (2021). A Description of the Advanced Research WRF Model Version 4.3 (No. NCAR/TN-556+STR). <http://dx.doi.org/10.5065/1dfh-6p97>.
- Strand, A., Hov, Ø. (1994). A two-dimensional global study of tropospheric ozone production. *Journal of Geophysical Research: Atmospheres*, 99, 22877-22895. <https://doi.org/10.1029/94JD01945>.
- Zare, A., Christensen, J.H., Irannejad, P., Brandt, J. (2012). Evaluation of two isoprene emission models for use in a long-range air pollution model. *Atmos Chem Phys*, 12, 7399-7412. <https://doi.org/10.5194/acp-12-7399-2012>.
- Zheng, Y., Alapaty, K., Herwehe, J.A., Del Genio, A.D., Niyogi, D. (2016). Improving High-Resolution Weather Forecasts Using the Weather Research and Forecasting (WRF) Model with an Updated Kain-Fritsch Scheme. *Mon Weather Rev*, 144, 833-860. <https://doi.org/10.1175/MWR-D-15-0005.1>.

3. Equation 1 (line 151) gives the calculation for oxidative potential as a function of PM<sub>2.5</sub> concentrations. If I understand correctly, this equation comes from Liu et al. (2018) cited in the paper and is based on positive matrix factorization performed on samples from coastal cities. Could an explanation be added stating 1) units of the terms, and 2) the reliability of using this equation outside of an industrial coastal region. To me, this is another uncertainty embedded in this study.

**Response:** Thank you very much for your constructive comments. As you understand, the OP prediction model (Equation (1)) used in this study is based on the work of Liu et al. (2018), which quantifies the contribution of coastal city PM<sub>2.5</sub> emission sources to DTT<sub>v</sub> activity by jointly using Positive Matrix Factorization and Multiple Linear Regression models. This model considers the population density of different coastal cities and the impact of different emission sources. Therefore, we assume that this model provides quantitative contributions of different emission sources to PM<sub>2.5</sub> mass concentrations, and we apply it to areas outside coastal cities. We have evaluated this model, and the results show that it performs well in areas outside coastal regions too. It should be acknowledged that the model is indeed more suitable for coastal cities. Following your suggestion, we have discussed the reliability of using this equation outside coastal areas in the uncertainty analysis in Section 3.5 (**Please see Pages 24-26**). We appreciate your kind reminder, and we have added units for terms in Section 2.2 (**Please see Page 6**).

Liu, W., Xu, Y., Liu, W., Liu, Q., Yu, S., Liu, Y., Wang, X., Tao, S. (2018). Oxidative potential of ambient PM<sub>2.5</sub> in the coastal cities of the Bohai Sea, northern China: Seasonal variation and source apportionment. *Environ Pollut*, 236, 514-528. <https://doi.org/10.1016/j.envpol.2018.01.116>.

The detailed revisions in the manuscript are shown below:

## Materials and methods (Page 6):

“Most of current data on OP of PM<sub>2.5</sub> in China are obtained by means of measurement, and the research objects are basically limited to specific cities, which to some extent hinders the conduct of research on OP in a large-scale region. Considering that Liu et al. (2018) collected samples across four seasons from multiple representative locations in China, their developed OP prediction model (Equation (1)) can support us in estimating OP (with a unit of  $nmol\ min^{-1}\ m^{-3}$ ) in China, thereby exploring the spatial distribution characteristics of OP and the contributions of different anthropogenic sources to OP. In the present study, we have used this relationship, in combination with the sensitivity simulations (Sect. 2.4), to calculate the OP.

$$OP = 0.088 \times re + 0.076 \times bi + 0.041 \times se + 0.034 \times in + 0.017 \times tr \quad (1)$$

where, *re*, *bi*, *in*, and *tr* represent the primary PM<sub>2.5</sub> concentrations (with a unit of  $\mu g\ m^{-3}$ ) for coal combustion, biomass burning, industry source, and transportation source, respectively. *se* (secondary aerosol formation) refers to the concentrations of secondary organic and inorganic (SOA and SIA, respectively) components (with a unit of  $\mu g\ m^{-3}$ ). In this study, the coal combustion refers to coal heating from the residential sector. Biomass burning includes open burning of agricultural biomass, domestic biomass burning for cooking and heating, and biomass burning from biomass power plants and coal-fired power plants. Industry source is mainly derived from specific industrial processes in the iron and steel industrial base, metallurgical production plants for non-ferrous metals (e.g., titanium and molybdenum), and so on. Transportation source primarily comes from tailpipe emissions. It's worth mentioning that secondary aerosol formation originates from a series of atmospheric reactions. Some identified sources (i.e., coal combustion, biomass burning, industrial processes, and transportation) may generate secondary inorganic and organic aerosols through the emission of their precursor components. The coefficient (with a unit of  $nmol\ min^{-1}\ m^{-3}\ source^{-1}$ ) reflect the intrinsic OP of each source.”

## Results and discussion (Pages 24-26):

### “3.5 Uncertainty of OP estimates

OP is considered an important indicator of PM<sub>2.5</sub> toxicity and is associated with adverse health effects. Linking the predicted health effects of aerosols to OP may be more relevant than considering PM<sub>2.5</sub> mass alone (Alwadei et al., 2020). However, previous studies of OP in China have mainly focused on local areas, and OP and its source are very different in space and time (Wen et al., 2023), which makes the health research of OP challenging. At present, there are two kinds of methods for evaluating OP of PM<sub>2.5</sub>: cellular method and non-cellular method. The reproducibility of cellular methods is poor, and it is difficult to achieve a large sample size analysis. And the choice of cell type or cell line can significantly affect the OP results (Xing et al., 2023). The non-cellular method has the advantages of fast speed, simple operation, high reproducibility, and low cost. The most common non-cellular methods are DTT, AA, GSH, and 2', 7' -dichlorofluorescein (DCFH) assays (Pietrogrande et al., 2019). However, standardized experimental methods for evaluating OP have not been established (Song et al., 2021), and it is difficult to provide more consistent data on OP across samples at different locations and times. Moreover, each non-cellular OP assay is specific for ROS, making none of the methods used as a standard method for assessing the toxicity of environmental particles. Several studies have used a multi-measure approach to compensate for the specificity of a single probe response to ROS (Calas et al., 2018; Puthussery et al., 2020; Yu et al., 2021; Xu et al., 2021). Xu et al. (2021) used three measurement methods (OP<sup>DTT</sup>, OP<sup>AA</sup>, and OP<sup>GSH</sup>) to estimate the Canadian annual mean OP and found that the sensitivity of the three methods to different components varied widely. Choosing a variety of methods for OP measurement can lead to more comprehensive results, but it can also lead to a significant increase in workload.

For this, we propose a hybrid approach combining existing observations of OP with the CTM. So, using



OP from assays and their observed links to sources and chemical constituents can then be parameterized and implemented in CTM for a comprehensive assessment of OP exposure over large areas and time periods. The method considers the seasonal characteristics of the chemical composition of PM<sub>2.5</sub> and the DTT activity measurement of PM<sub>2.5</sub>. A positive matrix factorization (PMF) model and multiple linear regression (MLR) model were used to quantify the contribution of PM<sub>2.5</sub> emission sources to OP (the volume-normalized DTT activity, DTT<sub>v</sub>). The normalized regression equation in this study provides the sensitivity of OP to each identified source. The advantage is that directly applying predicted and readily available PM<sub>2.5</sub> data makes it easy to estimate the OP and assess health risks over large regions and across time and space. This approach enables the exploration of spatial and seasonal variations in aerosol OP across China, providing insight into the contribution of sources, atmospheric processes, and meteorological conditions. There are some main limitations to this study that may lead to uncertainty in predicting OP outcomes. Firstly, the OP prediction considered is incomplete and does not include all sources of OP. For example, the transportation sector refers only to road transport, excluding emissions from ships and other mobile sources. And the transportation sector only considers tailpipe emissions in traffic. These lead to some OP uncertainties. Additionally, this study only considers the intrinsic OP of total SOA due to limited long-term measurements of SOA. Different types of SOA may exhibit varied OP responses due to differences in their sources, formation pathways, and chemical compositions. Aging and fresh SOA may also exhibit varying toxicities (Liu et al., 2023). In future research, efforts should be made to comprehensively collect PM<sub>2.5</sub> samples from various sources and fully explore the potential relationships between OP and PM<sub>2.5</sub> components/sources to further improve OP prediction models and reduce prediction uncertainties. Secondly, the OP prediction model adopted in this paper is based on Liu et al. (2018). The data samples are from DTT experimental measurements conducted in various coastal cities and from different emission sources, with limited data samples. In this study, it is used to predict the OP of cities across the country, which inevitably leads to a slight error in the forecast results. However, due to the spatiotemporal and emission source differences of the data samples were considered, the three cities selected are representative, which reduces the errors caused by the data samples to a certain extent. Thirdly, a significant body of literature also indicates that vertical resolution can reflect atmospheric thermodynamic environments and the evolution processes of mesoscale systems, which are related to the diffusion and transport of PM<sub>2.5</sub>. Insufficient vertical resolution can hinder the accurate prediction of PM<sub>2.5</sub> surface concentrations (HARA, 2011; Li et al., 2022; Li et al., 2023). Therefore, the configuration of the DEHM model (e.g., vertical resolution) also introduces uncertainties to this study. In conclusion, the results calculated by the method proposed in this study are compared with the existing measurement data (Liu et al., 2014; Liu et al., 2018; Wang et al., 2019), and a good agreement is observed. For instance, through DTT measurements, Zhang et al. (2023) reported an average  $OP^{DTTv}$  of  $1.33 \text{ nmol min}^{-1} \text{ m}^{-3}$  from January 2020 to June 2021 in downtown Nanjing, located in the YRD region of China, with a range of  $0.82\sim 2.08 \text{ nmol min}^{-1} \text{ m}^{-3}$ . This is close to our estimated results (Liu et al., 2024) for the YRD region, where the annual mean OP during 2010-2014 was  $1.56 \text{ nmol min}^{-1} \text{ m}^{-3}$ , and the annual mean OP for 2020 under two emission reduction scenarios were  $1.36 \text{ nmol min}^{-1} \text{ m}^{-3}$  and  $1.25 \text{ nmol min}^{-1} \text{ m}^{-3}$ , respectively. The relative errors for the two scenarios were 2.3% and 6.0%. Another study (Liu et al., 2020) investigating the OP of PM<sub>2.5</sub> in Wuhan, located in the CC region, reported a mean  $OP^{DTTv}$  of  $1.8 \text{ nmol min}^{-1} \text{ m}^{-3}$  for the summer of 2012 in downtown Wuhan. This aligns closely with our estimated results (Liu et al., 2024) for the CC region ( $1.73 \text{ nmol min}^{-1} \text{ m}^{-3}$ ), with a relative error of 3.9%. Therefore, the method proposed in this study is reliable. The proposed method provides a possibility to solve the difficulty and high cost of OP measurement.”

Alwadei, M., Thomson, S., Kramer, L., Shi, Z., Bloss, W., (2020). Oxidative Potential of PM<sub>2.5</sub> in Dammam, Saudi Arabia, and the effect of dust storms.

- Calas, A., Uzu, G., Kelly, F.J., Houdier, S., Martins, J.M.F., Thomas, F., Molton, F., Charron, A., Dunster, C., Oliete, A., Jacob, V., Besombes, J.L., Chevrier, F., Jaffrezo, J.L. (2018). Comparison between five acellular oxidative potential measurement assays performed with detailed chemistry on PM10 samples from the city of Chamonix (France). *Atmos Chem Phys*, 18, 7863-7875. <https://doi.org/10.5194/acp-18-7863-2018>.
- Liu, F., Joo, T., Ditto, J.C., Saavedra, M.G., Takeuchi, M., Boris, A.J., Yang, Y., Weber, R.J., Dillner, A.M., Gentner, D.R., Ng, N.L. (2023). Oxidized and Unsaturated: Key Organic Aerosol Traits Associated with Cellular Reactive Oxygen Species Production in the Southeastern United States. *Environ Sci Technol*, 57, 14150-14161. <https://doi.org/10.1021/acs.est.3c03641>.
- Liu, J., Ye, Z., Christensen, J.H., Dong, S., Geels, C., Brandt, J., Nenes, A., Yuan, Y., Im, U. (2024). Impact of anthropogenic emission control in reducing future PM2.5 concentrations and the related oxidative potential across different regions of China. *Sci Total Environ*, 918, 170638. <https://doi.org/10.1016/j.scitotenv.2024.170638>.
- Liu, Q., Baumgartner, J., Zhang, Y., Liu, Y., Sun, Y., Zhang, M. (2014). Oxidative Potential and Inflammatory Impacts of Source Apportioned Ambient Air Pollution in Beijing. *Environ Sci Technol*, 48, 12920-12929. <https://doi.org/10.1021/es5029876>.
- Liu, Q., Lu, Z., Xiong, Y., Huang, F., Zhou, J., Schauer, J.J. (2020). Oxidative potential of ambient PM2.5 in Wuhan and its comparisons with eight areas of China. *Sci Total Environ*, 701, 134844. <https://doi.org/10.1016/j.scitotenv.2019.134844>.
- Liu, W., Xu, Y., Liu, W., Liu, Q., Yu, S., Liu, Y., Wang, X., Tao, S. (2018). Oxidative potential of ambient PM2.5 in the coastal cities of the Bohai Sea, northern China: Seasonal variation and source apportionment. *Environ Pollut*, 236, 514-528. <https://doi.org/10.1016/j.envpol.2018.01.116>.
- Pietrogrande, M.C., Russo, M., Zagatti, E. (2019). Review of PM Oxidative Potential Measured with Acellular Assays in Urban and Rural Sites across Italy. *Atmosphere (Basel)*, 10, 626. <https://doi.org/10.3390/atmos10100626>.
- Puthussery, J.V., Singh, A., Rai, P., Bhattu, D., Kumar, V., Vats, P., Furger, M., Rastogi, N., Slowik, J.G., Ganguly, D., Prevot, A.S.H., Tripathi, S.N., Verma, V. (2020). Real-Time Measurements of PM2.5 Oxidative Potential Using a Dithiothreitol Assay in Delhi, India. *Environ Sci Technol Lett*, 7, 504-510. <https://doi.org/10.1021/acs.estlett.0c00342>.
- Song, M., Oh, S., Park, C., Bae, M. (2021). analytical procedure for dithiothreitol-based oxidative potential of PM2.5. *Asian J Atmos Environ*, 15, 2021015. <https://doi.org/10.5572/ajae.2021.015>.
- Wang, J., Lin, X., Lu, L., Wu, Y., Zhang, H., Lv, Q., Liu, W., Zhang, Y., Zhuang, S. (2019b). Temporal variation of oxidative potential of water soluble components of ambient PM2.5 measured by dithiothreitol (DTT) assay. *Sci Total Environ*, 649, 969-978. <https://doi.org/10.1016/j.scitotenv.2018.08.375>.
- Wen, W., Hua, T., Liu, L., Liu, X., Ma, X., Shen, S., Deng, Z. (2023). Oxidative Potential Characterization of Different PM2.5 Sources and Components in Beijing and the Surrounding Region. *Int J Environ Res Public Health*, 20, 5109. <https://doi.org/10.3390/ijerph20065109>.
- Xing, C., Wang, Y., Yang, X., Zeng, Y., Zhai, J., Cai, B., Zhang, A., Fu, T., Zhu, L., Li, Y., Wang, X., Zhang, Y. (2023). Seasonal variation of driving factors of ambient PM2.5 oxidative potential in Shenzhen, China. *Sci Total Environ*, 862, 160771. <https://doi.org/10.1016/j.scitotenv.2022.160771>.
- Xu, J., Martin, R.V., Evans, G.J., Umbrio, D., Traub, A., Meng, J., van Donkelaar, A., You, H., Kulka, R., Burnett, R.T., Godri Pollitt, K.J., Weichenthal, S. (2021). Predicting Spatial Variations in Multiple Measures of Oxidative Burden for Outdoor Fine Particulate Air Pollution across Canada. *Environ Sci Technol*, 55, 9750-9760. <https://doi.org/10.1021/acs.est.1c01210>.
- Yu, H., Puthussery, J.V., Wang, Y., Verma, V. (2021). Spatiotemporal variability in the oxidative potential of ambient fine particulate matter in the Midwestern United States. *Atmos Chem Phys*, 21, 16363-16386. <https://doi.org/10.5194/acp-21-16363-2021>.

Zhang, L., Hu, X., Chen, S., Chen, Y., Lian, H. (2023). Characterization and source apportionment of oxidative potential of ambient PM<sub>2.5</sub> in Nanjing, a megacity of Eastern China. *Env Pollut Bioavail*, 35, 2175728. <https://doi.org/10.1080/26395940.2023.2175728>.

4. Line 207. Why is the emissions reduction 30% and not another number? Please justify. Have any tests been done to learn about the response to different assumed emission reduction values? Perhaps this could be included in a section discussing uncertainties of the study's results.

**Response:** Thank you very much for your constructive comments. The choice of 30 % was motivated by the consideration that the perturbation would be large enough to produce a sizeable impact (i.e., more than numerical noise) even at long distances, while small enough to be in the near-linear atmospheric chemistry regime (Im et al., 2019). Based on past testing and experience, it has been demonstrated that setting the emissions reduction at 30% ensures the reliability of the results. Therefore, this study did not discuss the uncertainty of the 30% emission reduction setting. Following your suggestion, we have clarified the reasons for setting the emission reduction value at 30% in Section 2.4.2 (**Please see Page 10**).

The detailed revisions in the manuscript are shown below:

**Materials and methods (Page 10):**

“The emission from each individual source is reduced by 30%. The choice of 30 % was motivated by the consideration that the perturbation would be large enough to produce a sizeable impact (i.e., more than numerical noise) even at long distances, while small enough to be in the near-linear atmospheric chemistry regime (Galmarini et al., 2017; Im et al., 2019).”

Galmarini, S., Koffi, B., Solazzo, E., Keating, T., Hogrefe, C., Schulz, M., Benedictow, A., Griesfeller, J.J., Janssens-Maenhout, G., Carmichael, G., Fu, J., Dentener, F. (2017). Technical note: Coordination and harmonization of the multi-scale, multi-model activities HTAP2, AQMEII3, and MICS-Asia3: simulations, emission inventories, boundary conditions, and model output formats. *Atmos Chem Phys*, 17, 1543-1555. <https://doi.org/10.5194/acp-17-1543-2017>.

Im, U., Christensen, J.H., Nielsen, O.K., Sand, M., Makkonen, R., Geels, C., Anderson, C., Kukkonen, J., Lopez-Aparicio, S., Brandt, J. (2019). Contributions of Nordic anthropogenic emissions on air pollution and premature mortality over the Nordic region and the Arctic. *Atmos Chem Phys*, 19, 12975-12992. <https://doi.org/10.5194/acp-19-12975-2019>.

5. Line 207. Could the authors clarify whether only PM<sub>2.5</sub> emissions are reduced or if any precursors (e.g. SO<sub>2</sub>) also have emission reductions. If I understand the methods correctly, it appears that only primary PM<sub>2.5</sub> emissions are perturbed for each sector. Since about half the aerosol is produced by chemistry (line 227) and emission controls can be placed on PM<sub>2.5</sub> precursors (e.g., SO<sub>2</sub> and NO<sub>x</sub>), it seems that additional calculations for reducing precursor species from different sectors is warranted. Could the authors please justify why only primary PM<sub>2.5</sub> anthropogenic emission reductions are investigated, or add results presenting the impact of reducing PM<sub>2.5</sub> precursors on the oxidative potential is examined.

**Response:** Thank you very much for your constructive comments. We implemented uniform emission controls on primary particles and gas emissions from specific emission sectors. Literature (Hodan et al., 2004; Chen et al., 2018; Zhang et al., 2022) has shown that in China, the proportion of secondary and primary PM<sub>2.5</sub> mass to total PM<sub>2.5</sub> mass is approximately equal; therefore, we assumed that they each constitute 50% (as presented on Page 11). In this study, by implementing uniform emission controls on primary particles and gas emissions from specific emission sectors, we conducted perturbation simulations for these emission sectors. Subsequently, we estimated the respective contributions of these emission sectors to PM<sub>2.5</sub> concentration/OP using Equations (9~11). In summary, this study perturbed both primary particles and gas emissions

simultaneously.

Chen, P., Wang, T., Kasoar, M., Xie, M., Li, S., Zhuang, B., Li, M. (2018). Source Apportionment of PM<sub>2.5</sub> during Haze and Non-Haze Episodes in Wuxi, China. *Atmosphere (Basel)*, 9, 267. <https://doi.org/10.3390/atmos9070267>.

Hodan, W.M., Barnard, W.R. (2004). Evaluating the contribution of PM<sub>2.5</sub> precursor gases and re-entrained road emissions to mobile source PM<sub>2.5</sub> particulate matter emissions. *MACTEC Federal Programs, Research Triangle Park, NC*. <https://www3.epa.gov/ttnchie1/conference/ei13/mobile/hodan.pdf>.

Zhang, H., Li, N., Tang, K., Liao, H., Shi, C., Huang, C., Wang, H., Guo, S., Hu, M., Ge, X. (2022). Estimation of secondary PM<sub>2.5</sub> in China and the United States using a multi-tracer approach. *Atmos Chem Phys*, 22, 5495-5514. <https://doi.org/10.5194/acp-2021-683>.

6. Lines 218-225. Could information on the fraction of each sub-sector's contribution to  $E_{re}$  and  $E_{pp}$  be added?

**Response:** Thank you very much for your constructive comments. As introduced in Section 2.4.2, the percentage contribution ( $PC_{re_j}$ ) of PM<sub>2.5</sub> emissions from residential subsector  $j$  ( $E_{re_j}$ ) to the total PM<sub>2.5</sub> emissions from the residential sector ( $E_{re}$ ) is calculated using Equation (6). The values for  $E_{re_j}$  and  $E_{re}$  can be obtained from the literature (Yun et al., 2020). After calculation, the values for  $PC_{re_{coal\ cooking}}$ ,  $PC_{re_{coal\ heating}}$ ,  $PC_{re_{biomass\ cooking}}$ , and  $PC_{re_{biomass\ heating}}$  are determined to be 21%, 27%, 33%, and 19%, respectively. The percentage contributions ( $PC_{pp_{bi_{cf}}}$ ) of PM<sub>2.5</sub> emissions from biomass power plants ( $E_{pp_{bi}}$ ) and coal-fired power plants ( $E_{pp_{cf}}$ ) to the total PM<sub>2.5</sub> emissions from power plants ( $E_{pp}$ ) are calculated using Equations (7~8), where  $EF$ ,  $FQ$ ,  $E_{pp_{cf}}$ , and  $E_{pp}$  are obtained from the literature (Zheng et al., 2018; Tong et al., 2018; Yun et al., 2020; MEE, 2020; Wang et al., 2020; Tang et al., 2020; Lin et al., 2021; Chen et al., 2022). After calculation,  $PC_{pp_{bi_{cf}}}$  is determined to be 54%. Following your suggestion, we have added the percentage contributions of sub-sectors to  $E_{re}$  and  $E_{pp}$  in Section 2.4.2 (**Please see Page 11**).

The detailed revisions in the manuscript are shown below:

**Materials and methods (Page 11):**

“The values of  $E_{re_j}$  and  $E_{re}$  are obtained from the literature (Yun et al., 2020). After calculation, the values for  $PC_{re_{coal\ cooking}}$ ,  $PC_{re_{coal\ heating}}$ ,  $PC_{re_{biomass\ cooking}}$ , and  $PC_{re_{biomass\ heating}}$  are determined to be 21%, 27%, 33%, and 19%, respectively.”

“ $EF$ ,  $FQ$ ,  $E_{pp_{cf}}$ , and  $E_{pp}$  are obtained from the literature (Zheng et al., 2018; Tong et al., 2018; Yun et al., 2020; MEE, 2020; Wang et al., 2020; Tang et al., 2020; Lin et al., 2021; Chen et al., 2022). After calculation,  $PC_{pp_{bi_{cf}}}$  is determined to be 54%.”

Yun, X., Shen, G.F., Shen, H.Z., Meng, W.J., Chen, Y.L., Xu, H.R., Ren, Y., Zhong, Q.R., Du, W., Ma, J.M., Cheng, H.F., Wang, X.L., Liu, J.F., Wang, X.J., Li, B.G., Hu, J.Y., Wan, Y., Tao, S. (2020). Residential solid fuel emissions contribute significantly to air pollution and associated health impacts in China. *Sci Adv*, 6. <https://www-science-org.ez.statsbiblioteket.dk/doi/10.1126/sciadv.aba7621>.

Zheng, B., Tong, D., Li, M., Liu, F., Hong, C.P., Geng, G.N., Li, H.Y., Li, X., Peng, L.Q., Qi, J., Yan, L., Zhang, Y.X., Zhao, H.Y., Zheng, Y.X., He, K.B., Zhang, Q. (2018). Trends in China's anthropogenic emissions since 2010 as the consequence of clean air actions. *Atmos Chem Phys*, 18, 14095-14111. <https://doi.org/10.5194/acp-18-14095-2018>.

Tong, D., Zhang, Q., Liu, F., Geng, G., Zheng, Y., Xue, T., Hong, C., Wu, R., Qin, Y., Zhao, H., Yan, L., He, K. (2018). Current Emissions and Future Mitigation Pathways of Coal-Fired Power Plants in China from 2010 to 2030. *Environ Sci Technol*, 52, 12905-12914. <https://doi.org/10.1021/acs.est.8b02919>.

- Yun, X., Shen, G.F., Shen, H.Z., Meng, W.J., Chen, Y.L., Xu, H.R., Ren, Y., Zhong, Q.R., Du, W., Ma, J.M., Cheng, H.F., Wang, X.L., Liu, J.F., Wang, X.J., Li, B.G., Hu, J.Y., Wan, Y., Tao, S. (2020). Residential solid fuel emissions contribute significantly to air pollution and associated health impacts in China. *Sci Adv*, 6. <https://www-science-org.ez.statsbiblioteket.dk/doi/10.1126/sciadv.aba7621>.
- MEE. (2020). Bulletin of the second National Survey of pollution sources. [http://www.gov.cn/xinwen/2020-06/10/content\\_5518391.htm](http://www.gov.cn/xinwen/2020-06/10/content_5518391.htm). Accessed 11 January, 2023.
- Wang, G., Deng, J., Zhang, Y., Zhang, Q., Duan, L., Hao, J., Jiang, J. (2020). Air pollutant emissions from coal-fired power plants in China over the past two decades. *Sci Total Environ*, 741, 140326. <https://doi.org/10.1016/j.scitotenv.2020.140326>.
- Tang, L., Xue, X., Qu, J., Mi, Z., Bo, X., Chang, X., Wang, S., Li, S., Cui, W., Dong, G. (2020). Air pollution emissions from Chinese power plants based on the continuous emission monitoring systems network. *Sci Data*, 7, 325. <https://doi.org/10.1038/s41597-020-00665-1>.
- Lin, S., Tian, H., Hao, Y., Wu, B., Liu, S., Luo, L., Bai, X., Liu, W., Zhao, S., Hao, J., Guo, Z., Lv, Y. (2021). Atmospheric emission inventory of hazardous air pollutants from biomass direct-fired power plants in China: Historical trends, spatial variation characteristics, and future perspectives. *Sci Total Environ*, 767, 144636. <https://doi.org/10.1016/j.scitotenv.2020.144636>.
- Chen, L., Wang, T., Bo, X., Zhuang, Z., Qu, J., Xue, X., Tian, J., Huang, M., Wang, P., Sang, M. (2022). Thermal Power Industry Emissions and Their Contribution to Air Quality on the Fen-Wei Plain. *Atmosphere (Basel)*, 13. <https://doi.org/10.3390/atmos13050652>.

7. Equation 9. Could the authors explain the 30% term in this equation? If it is the percentage reduction, then wouldn't this term change depending on which sourcesector is perturbed?

**Response:** Thank you very much for your constructive comments. In this study, perturbation simulations were conducted by implementing a 30% emission reduction ratio for specific emission sources to calculate the corresponding response to a 30% reduction. These responses were then converted into contributions of the emission sources to PM<sub>2.5</sub> concentration/OP using Equations (9~11). Considering that the implementation of emission reductions may affect atmospheric dynamic processes, we set the emission reduction ratio to 30% based on previous tests and experience. As previously replied, the choice of 30% was motivated by the consideration that the perturbation would be large enough to produce a sizeable impact (i.e., more than numerical noise) even at long distances, while small enough to be in the near-linear atmospheric chemistry regime (Im et al., 2019). This also indicates that this value will not change due to different perturbed sectors.

Im, U., Christensen, J.H., Nielsen, O.K., Sand, M., Makkonen, R., Geels, C., Anderson, C., Kukkonen, J., Lopez-Aparicio, S., Brandt, J. (2019). Contributions of Nordic anthropogenic emissions on air pollution and premature mortality over the Nordic region and the Arctic. *Atmos Chem Phys*, 19, 12975-12992. <https://doi.org/10.5194/acp-19-12975-2019>.

8. Figure 3. Are the results shown for simulation C1? Why not also show the evaluation for simulations C2 and C3? Throughout the manuscript, it would be informative to see the figures for all three scenarios. Please add these figures in either the main manuscript or the supplement.

**Response:** Thank you for this kind reminding and suggestions. As you understand, Figure 3 presents the model evaluation results for Scenario C<sub>1</sub>. To comprehensively assess the overall performance of the models under three scenarios, we have supplemented density scatter plots for Scenarios C<sub>2</sub> and C<sub>3</sub> in the supplemental materials (as shown in Figure S2) as per your suggestion and discussed them in Section 3.1 (**Please see Pages 13-14 in the manuscript and Page 4 in the supplemental materials**).

The detailed revisions in the manuscript are shown below:

**Results and discussion (Pages 13-14):**

“The density scatter plot of model performance and evaluation for China in scenario C<sub>1</sub> based on annual mean PM<sub>2.5</sub> observations from MEE and PM<sub>2.5</sub> derived from the Dalhousie dataset are shown in Figure 3. Overall, the model performance in terms of correlation coefficient (R) and normalized mean error (NME) calculated based on annual mean observations met the performance criteria suggested by Emery et al. (2017) (NME<0.5, R>0.4), and the normalized mean bias (NMB) was also close to the performance criteria suggested by Emery et al. (2017) (NMB<±0.3). Compared to the observations, the model performance in terms of R, NME, and NMB calculated based on the Dalhousie dataset was slightly poorer but still close to the performance criteria suggested by Emery et al. (2017). Additionally, this study also evaluated the model performance in scenarios C<sub>2</sub> and C<sub>3</sub>, as illustrated in Figures S2. Figures S2a (c) and S2b (d) depicted density scatter plots of model performance and evaluation in scenarios C<sub>2</sub> (C<sub>3</sub>) based on annual mean observations and the Dalhousie dataset, respectively. It was found that under scenarios C<sub>2</sub> and C<sub>3</sub>, the model performance in terms of R and NME, calculated based on both annual mean observations and Dalhousie dataset met the performance criteria suggested by Emery et al. (2017). The NMB under scenarios C<sub>2</sub> and C<sub>3</sub> calculated based on both annual mean observations and Dalhousie dataset were also close to the performance criteria suggested by Emery et al. (2017). Therefore, the simulated annual mean PM<sub>2.5</sub> concentrations in scenarios C<sub>1</sub>, C<sub>2</sub> and C<sub>3</sub> is considered reliable.

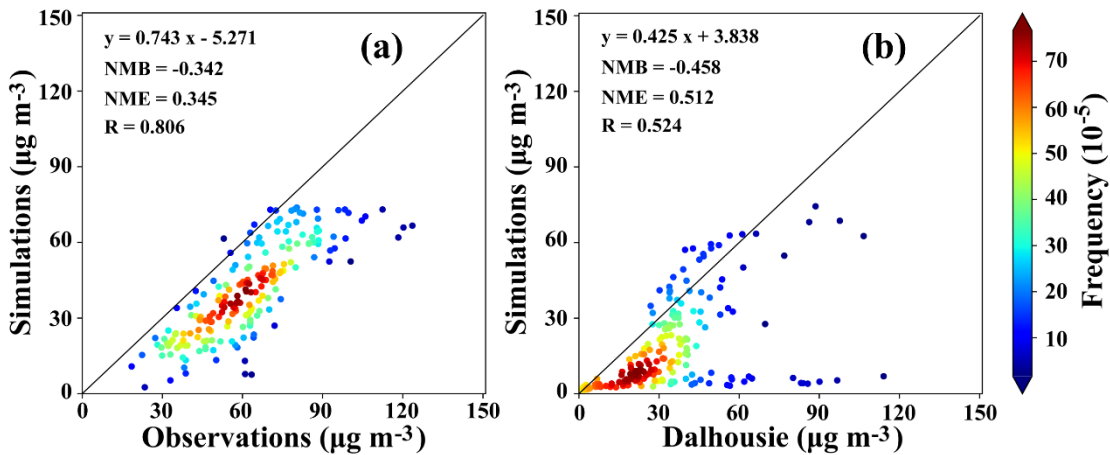

Figure 3. Density scatterplots of model performance and validation for China in scenario C<sub>1</sub> based on (a) annual mean PM<sub>2.5</sub> observations from MEE and (b) annual mean PM<sub>2.5</sub> derived from the Dalhousie dataset in 2014.”

The detailed revisions in the supplemental materials are shown below (Page 4):

“

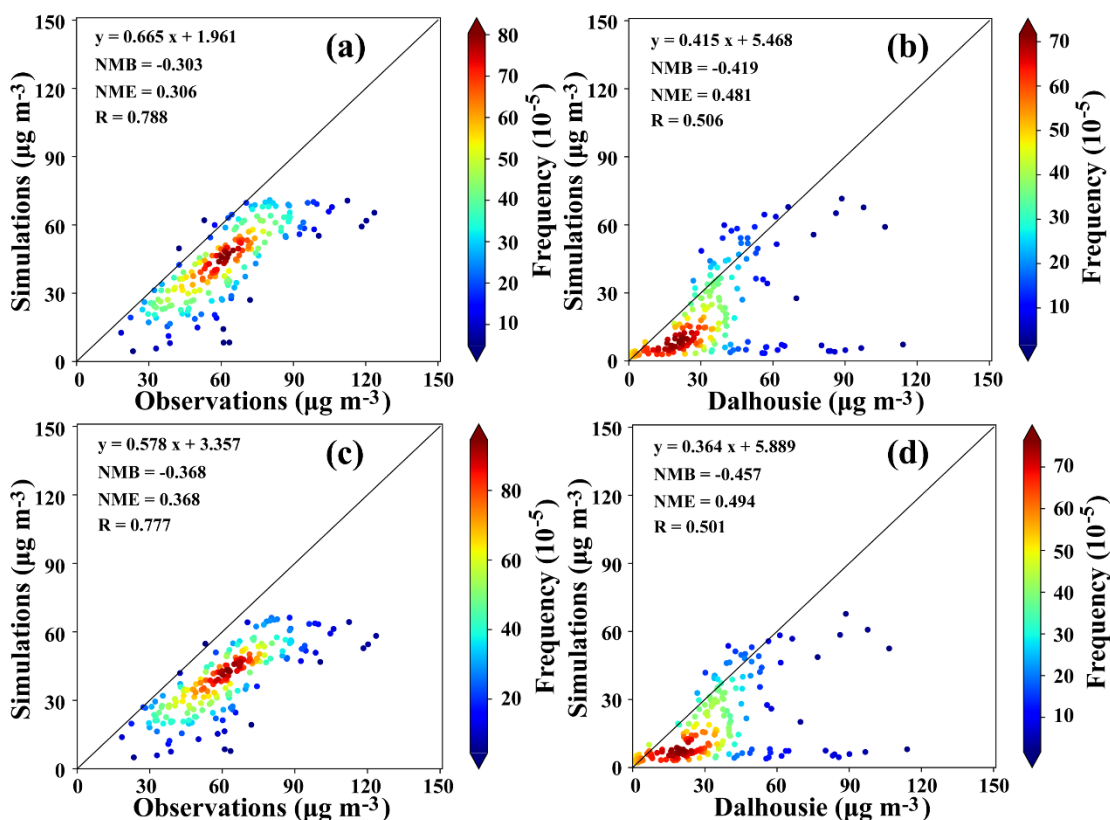

Figure S2. Density scatterplots of model performance and validation in scenario C<sub>2</sub> and C<sub>3</sub> for China in 2014; (a) and (b) represent the results in scenario C<sub>2</sub> based on annual mean PM<sub>2.5</sub> observations and annual mean PM<sub>2.5</sub> derived from the Dalhousie dataset, respectively; (c) and (d) represent the results in scenario C<sub>3</sub> based on annual mean PM<sub>2.5</sub> observations and annual mean PM<sub>2.5</sub> derived from the Dalhousie dataset, respectively.”

Emery, C., Liu, Z., Russell, A.G., Odman, M.T., Yarwood, G., Kumar, N. (2017). Recommendations on statistics and benchmarks to assess photochemical model performance. *J Air Waste Manag Assoc*, 67, 582-598. <https://doi-org.ez.statsbiblioteket.dk/10.1080/10962247.2016.1265027>.

9. Are the Figure 4 results for the annual mean? If so, please state this and explain if it is subtracting the annual mean of the simulation results from the annual mean of the observations. In contrast, it could be differencing individual time points for each location and then taking an annual mean of the difference.

**Response:** Thank you very much for your constructive comments. Figure 4 depicted the spatial distribution of the annual mean simulated minus annual mean observed values, as well as the spatial distribution of the annual mean simulated values minus the Dalhousie dataset. Following your suggestion, we have clarified the content of Figure 4 in Section 3.1 and the figure caption (**Please see Pages 14-15**).

The detailed revisions in the manuscript are shown below:

**Results and discussion:**

“Figure 4 showed the spatial distribution of the annual mean simulated minus annual mean observed values (denoted as  $diff_{si-ob}$ ) (Figure 4a), as well as the spatial distribution of the annual mean simulated values minus the Dalhousie dataset (denoted as  $diff_{si-DH}$ ) (Figure 4b).” (**Page 14**)

“

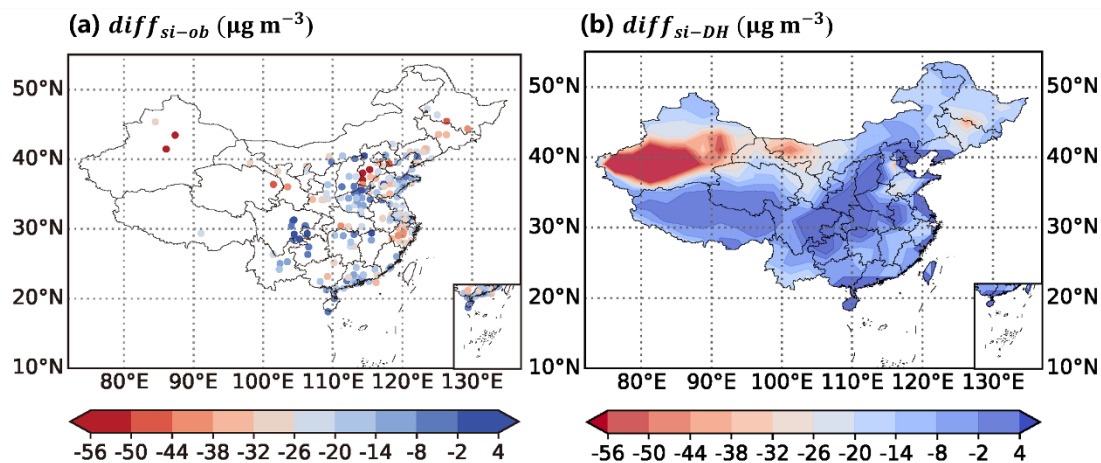

Figure 4. Spatial distribution of the annual mean simulated minus annual mean observed values (a), as well as the spatial distribution of the annual mean simulated values minus the Dalhousie dataset (b) for China in 2014 under scenario C<sub>1</sub>.” (Page 15)

10. Figure 4 shows differences of up to 18 ug/m3 in central China. How does this compare to the annual mean concentrations? It would be helpful to also see a percent difference map.

**Response:** Thank you very much for your constructive comments. Thank you very much for your suggestion. Figure 4 showed differences as high as  $-18\mu\text{g m}^{-3}$  in central and eastern China, which is an underestimation of 37% compared to the average annual observations. While it is indeed true that supplementing with percentage difference maps could provide a better comparison of the bias between simulated and observed (Dalhousie dataset) values, considering that this study has already divided China into four regions, a comparison from a regional perspective may be more appropriate. Therefore, we have supplemented the bias between simulated and observed (Dalhousie dataset) values for the four regions (Please see Pages 14-15). The simulated PM<sub>2.5</sub> concentrations in eastern, central, northeastern, and western China were 37%, 21%, -49%, and 41% lower than the observations, respectively; the simulated values were 28%, 3%, 54%, and 48% higher than the Dalhousie dataset, respectively. The disparities in model performance across regions may be attributed to uncertainties in the simulation of meteorological fields, coupled with insufficient consideration of species in the reaction processes within the model. Considering the existing literature (Huang et al., 2021; Jia et al., 2021), it is known that bias within approximately 50% is acceptable. For example, the PM<sub>2.5</sub> concentrations in East China in 2014 simulated by Jia et al. (2021) was overestimated by 48%. Shi et al. (2021) also reported PM<sub>2.5</sub> concentrations being overestimated or underestimated by 40% compared to observed values. Hence, the simulated bias in this study falls within an acceptable range, meeting the research requirements.

The detailed revisions in the manuscript are shown below:

#### Results and discussion (Pages 14-15):

“Both Figure 4a and Figure 4b indicated that the majority of regions (central and eastern China) exhibited differences ranging from  $-18\mu\text{g m}^{-3}$  to  $0\mu\text{g m}^{-3}$ , which is an underestimation of 37% compared to the average annual observations. The simulated PM<sub>2.5</sub> concentrations in eastern, central, northeastern, and western China were 37%, 21%, -49%, and 41% lower than the observations, respectively; the simulated values were 28%, 3%, 54%, and 48% higher than the Dalhousie dataset, respectively. The disparities in model performance across regions may be attributed to uncertainties in the simulation of meteorological fields, coupled with insufficient consideration of species in the reaction processes within the model. Considering the



existing literature (Huang et al., 2021; Jia et al., 2021), it is known that bias within approximately 50% is acceptable. For example, the PM<sub>2.5</sub> concentrations in East China in 2014 simulated by Jia et al. (2021) was overestimated by 48%. Shi et al. (2021) also reported PM<sub>2.5</sub> concentrations being overestimated or underestimated by 40% compared to observed values. Hence, the simulated bias in this study falls within an acceptable range, meeting the research requirements.”

Huang, L., Zhu, Y., Zhai, H., Xue, S., Zhu, T., Shao, Y., Liu, Z., Emery, C., Yarwood, G., Wang, Y., Fu, J., Zhang, K., Li, L. (2021). Recommendations on benchmarks for numerical air quality model applications in China – Part 1: PM<sub>2.5</sub> and chemical species. *Atmos Chem Phys*, 21, 2725-2743. <https://doi.org/10.5194/acp-21-2725-2021>.

Jia, W., Zhang, X. (2021). Impact of modified turbulent diffusion of PM<sub>2.5</sub> aerosol in WRF-Chem simulations in eastern China. *Atmos Chem Phys*, 21, 16827-16841. <https://doi.org/10.5194/acp-21-16827-2021>.

Shi, X., Zheng, Y., Lei, Y., Xue, W., Yan, G., Liu, X., Cai, B., Tong, D., Wang, J. (2021). Air quality benefits of achieving carbon neutrality in China. *Sci Total Environ*, 795, 148784. <https://doi.org/10.1016/j.scitotenv.2021.148784>.

11. Line 297. I disagree with the statement, “We conclude that the model performs well ...”, which is stated just after noting the poor agreement in northwest China (which is for good reasons). Please qualify this statement. I suggest limiting the remainder of the analysis to all of China except northwest China. See also my comments about performing calculations for specified regions.

**Response:** Thank you very much for your constructive comments. We apologize for drawing unscientific conclusions. Based on your reminder, we have rewritten the conclusion (**Please see Page 15**). The purpose of plotting Figures S1 and 5 in this study was to assess the performance of the DEHM model in China as a whole on a temporal scale. From Figure 5, it can be observed that the simulated values closely align with the observed values from April to September. However, in other months, there was a slightly poorer alignment between simulated and observed values. Nonetheless, considering the overall performance throughout the year, as analyzed in conjunction with Figure S1, it can be deduced that both the correlation R and NME met the performance criteria suggested by Emery et al. (2017) for all months except December. Furthermore, the results in Figure 4 indicated that the bias across various regions in DEHM is acceptable. Consequently, on an aggregate level for China, the model demonstrates acceptable performance in simulating monthly average PM<sub>2.5</sub> concentrations.

The detailed revisions in the manuscript are shown below:

**Results and discussion (Page 15):**

“From Figure 5, it can be observed that the simulated values closely align with the observed values from April to September. However, in other months, there was a slightly poorer alignment between simulated and observed values. Nonetheless, considering the overall performance throughout the year, as analyzed in conjunction with Figure S1, it can be deduced that both the correlation R and NME met the performance criteria suggested by Emery et al. (2017) for all months except December. Furthermore, the results in Figure 4 indicated that the bias across various regions in DEHM is acceptable. Consequently, on an aggregate level for China, the model demonstrates acceptable performance in simulating monthly average PM<sub>2.5</sub> concentrations.”

Emery, C., Liu, Z., Russell, A.G., Odman, M.T., Yarwood, G., Kumar, N. (2017). Recommendations on statistics and benchmarks to assess photochemical model performance. *J Air Waste Manag Assoc*, 67, 582-598. <https://doi-org.ez.statsbiblioteket.dk/10.1080/10962247.2016.1265027>.

12. Lines 309-320. Do the maps of PM<sub>2.5</sub> concentration and OP reflect the anthropogenic emissions map of PM<sub>2.5</sub>? As written, this text does not tell me anything new, but I think the authors were hinting at some useful information in the last few lines. I suggest adding maps of anthropogenic emissions for each sector to support why we see the spatial distribution in Figure 6. Then rewrite these lines to focus on these connections.

**Response:** Thank you very much for your constructive comments. Figure 6 illustrates the spatial distribution of overall PM<sub>2.5</sub> concentration and overall OP across China. The purpose is to reveal the spatial distribution characteristics of overall PM<sub>2.5</sub> concentration and overall OP, identifying areas of low and high values for both. Additionally, as suggested by you earlier, we have provided the overall annual average PM<sub>2.5</sub> concentration and overall annual average OP for different regions in numerical form to more intuitively present the pollution levels and differences across regions. We have also considered your suggestion to provide spatial distribution maps for PM<sub>2.5</sub> concentration and OP for each sector, and this is discussed in Section 3.4 and presented in Figure 11 (**Please see Pages 22-24**). Since Section 3.4 focuses on investigating the influence of anthropogenic emission sectors on PM<sub>2.5</sub> concentration and OP, we discuss the levels of PM<sub>2.5</sub> and OP for each emission sector here, along with the reasons for spatial variations. Furthermore, following your suggestion, we have emphasized the sources of relevant information in the respective positions of Section 3.2 (**Please see Pages 16-17**).

The detailed revisions in the manuscript are shown below:

### 3.2 Spatial distribution characteristics of PM<sub>2.5</sub> and OP (Pages 16-17):

“To learn about the spatial distributions of PM<sub>2.5</sub> concentrations and OP, we plot maps of surface PM<sub>2.5</sub> and OP for scenario C<sub>1</sub> (Figure 6a and 6b) and quantified the average annual PM<sub>2.5</sub> concentrations and OP across different regions of China (Figure 6c). Figure 6d depicted the geographical location of the study area. High PM<sub>2.5</sub> concentrations and High OP are mainly located in central and eastern urban clusters. Low PM<sub>2.5</sub> concentrations and Low OP are mainly distributed in northeastern and western China. The results in Figure 6c indicated that the annual average PM<sub>2.5</sub> concentrations/OP in eastern, central, northeastern, and western China are  $33 \mu\text{g m}^{-3} / 1.4 \text{ nmol min}^{-1} \text{ m}^{-3}$ ,  $46 \mu\text{g m}^{-3} / 2.0 \text{ nmol min}^{-1} \text{ m}^{-3}$ ,  $19 \mu\text{g m}^{-3} / 0.8 \text{ nmol min}^{-1} \text{ m}^{-3}$ , and  $12 \mu\text{g m}^{-3} / 0.5 \text{ nmol min}^{-1} \text{ m}^{-3}$ , respectively.

Due to differences in city types, pollutant emission intensities, and pollutant chemical components in different regions, there are significant spatial heterogeneity in PM<sub>2.5</sub> concentrations and therefore in OP (see Sect. 3.4 and Figure 11 for details). Due to high population density, socio-economic activities and winter heating needs, large amounts of anthropogenic emissions, especially from industry, transportation, coal burning and biomass burning, exacerbate PM<sub>2.5</sub> and redox active component pollution.

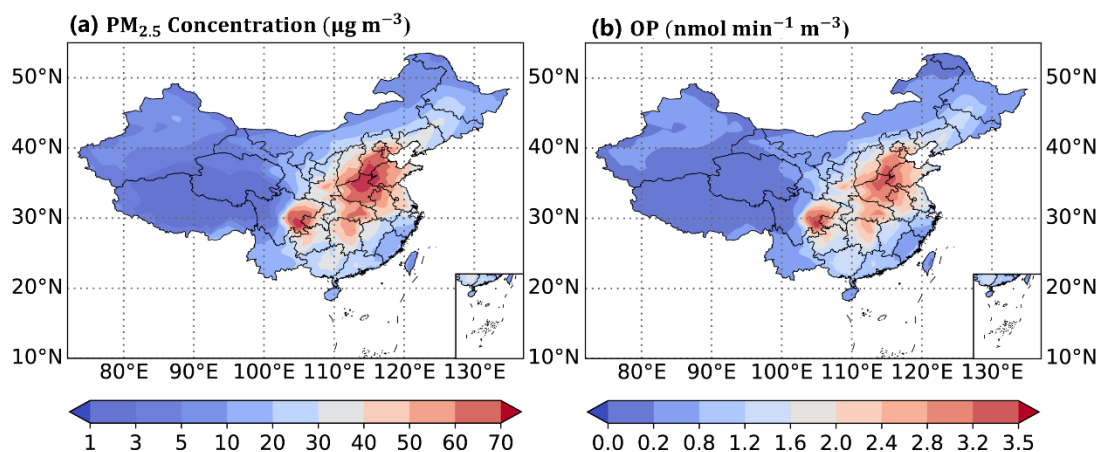

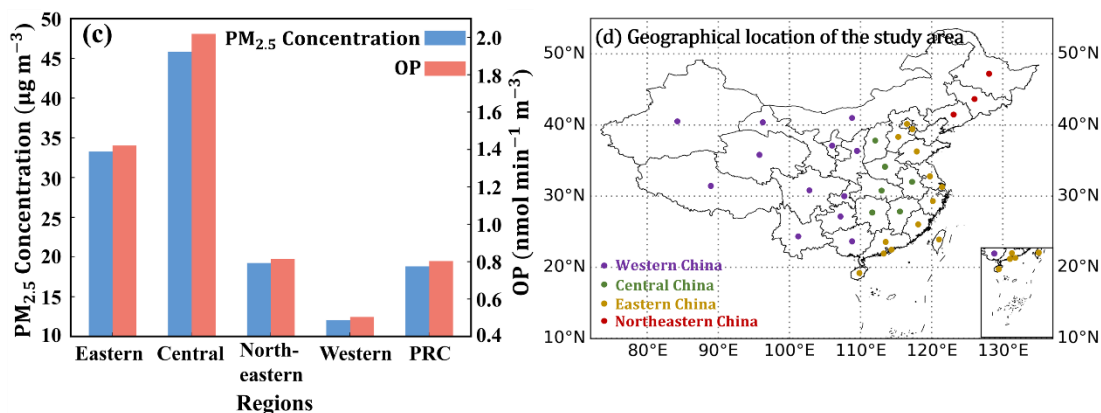

Figure 6. Spatial clustering of annual mean PM<sub>2.5</sub> concentrations (a) and annual mean OP (b) in China, annual mean PM<sub>2.5</sub> concentrations and annual mean OP (c) in different regions of China in 2014 under scenario C<sub>1</sub>, and geographical location of the study area (d); the central region of China comprises Shanxi, Anhui, Jiangxi, Henan, Hubei, and Hunan provinces; the eastern region of China comprises Beijing, Tianjin, Hebei, Shanghai, Jiangsu, Zhejiang, Fujian, Shandong, Guangdong, Hainan, Hong Kong, Macao, and Taiwan; It should be noted that the eastern region in this study includes Hong Kong, Macao and Taiwan; the western region of China consists of twelve provinces (autonomous regions and municipalities): Inner Mongolia, Guangxi, Chongqing, Sichuan, Guizhou, Yunnan, Tibet, Shaanxi, Gansu, Qinghai, Ningxia and Xinjiang; the northeastern region of China comprises Liaoning, Jilin and Heilongjiang provinces.”

### 3.4 Contribution of anthropogenic emission sources to PM<sub>2.5</sub> and OP (Pages 22-24):

“Thus, we explored the spatial distribution characteristics of PM<sub>2.5</sub> and OP from different anthropogenic sources to reveal the spatial contributions of PM<sub>2.5</sub> concentrations and OP, as shown in Figure 11. It was observed that the spatial distribution features of PM<sub>2.5</sub> concentrations and OP from each emission source are similar to those in Figure 6, and they all adhere to the principle that the eastern region is higher than the western.

It can be seen from Figure 11 that the main reason that secondary aerosol formation is the main anthropogenic source of both PM<sub>2.5</sub> concentrations and OP in China is due to the higher pollution levels, more contributions to mass, and toxicity in the central and eastern regions. Relevant study (Molina et al., 2023) has highlighted the significant contribution of secondary aerosol formation to particle mass and intrinsic OP.

Due to Chinese crops, especially corn straw, and power plants are mainly concentrated in central and eastern regions, northeast and part of the western region, as well as the bigger intrinsic OP (Equation (1)), this results in biomass burning becoming the second contribution.

In this study, coal combustion refers to coal heating from the residential sector. Coal burning increases secondary inorganic and organic aerosols in the air (Liu et al., 2018) which leads to stronger oxidative toxicity. Thus, due to greater heating demand in locations with high population density and chilly winters (e.g., the northern part of the central and eastern China), PM<sub>2.5</sub> concentrations and OP linked to coal burning are higher.

Industrial emissions are mainly derived from specific industrial processes in the iron and steel industrial base, metallurgical production plants for non-ferrous metals (e.g., titanium and molybdenum), and so on. This is one main source for metals. Due to the correlation between these transition metals and OP (Fang et al., 2017; Liu et al., 2018), China's four industrial zones (Liaozhong-South Heavy Industry Base, Beijing-Tianjin-Tangshan Industrial Base, Shanghai-Nanjing-Hangzhou Industrial Base, and Pearl River Delta Light Industry Base) are important contributors to PM<sub>2.5</sub> and OP emissions from industrial sources.

The transportation sector in the DEHM model only considers tailpipe emissions, excluding non-exhaust emissions from vehicles like road dust, brake dust, and tire wear, which is a main reason that the traffic sources exhibit the lowest contribution to  $PM_{2.5}$  concentrations/OP. Moreover, it can be observed from Figure 11 that the sector's emissions are mainly concentrated in a small number of regions, such as Henan, Hebei, and Shandong. This is valid for the top three provinces in terms of vehicle particulate matter and nitrogen oxide emissions in 2014 according to China Annual Vehicle Pollution Prevention and Control Report (MEE, 2015).

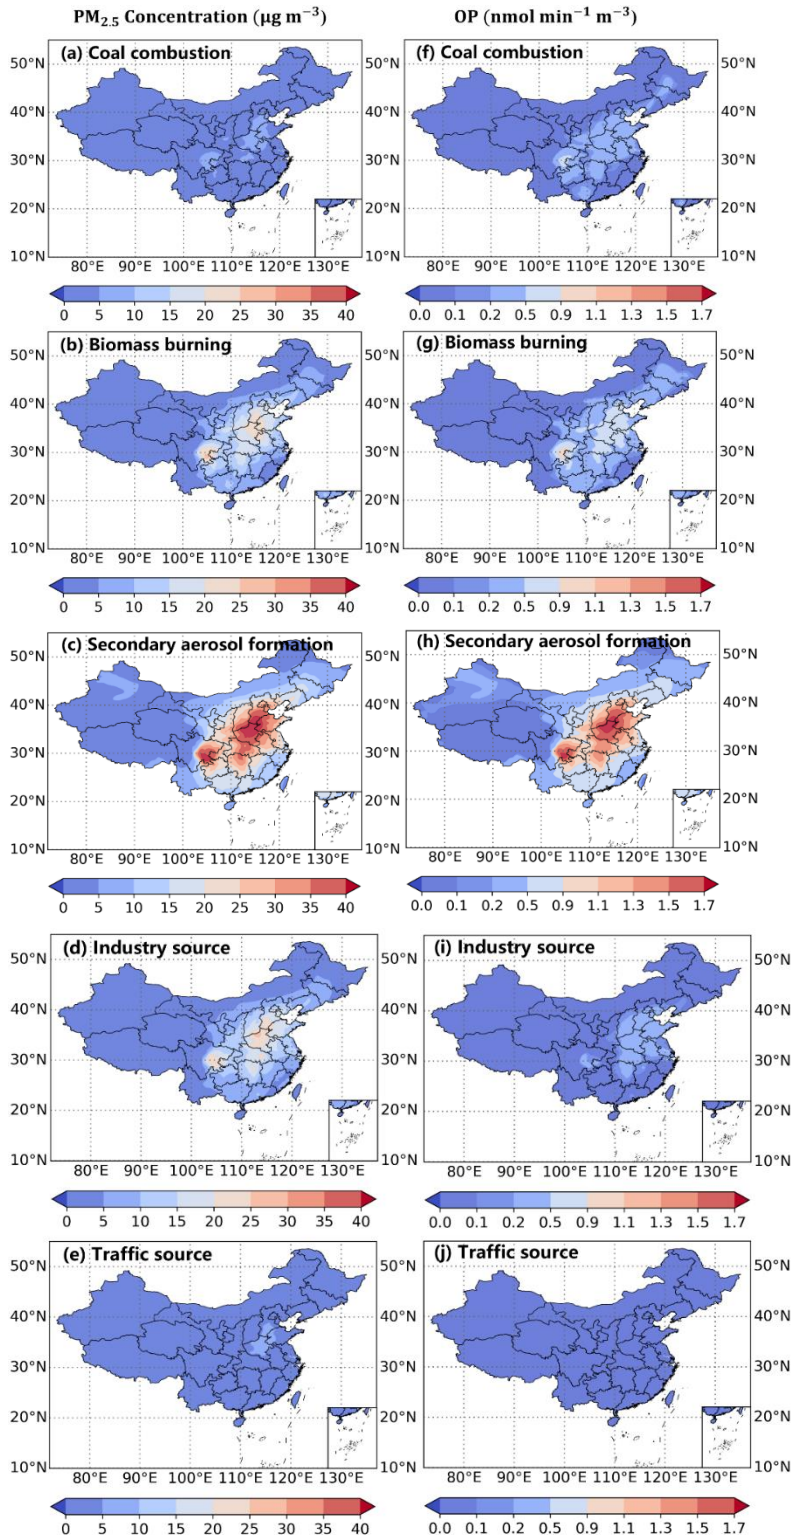

Figure 11. Spatial distribution of annual mean PM<sub>2.5</sub> concentrations and annual mean OP from different anthropogenic sources for China in 2014 under scenario C<sub>1</sub>; (a)~(e) are PM<sub>2.5</sub> concentrations derived from coal combustion for residential heating, biomass burning, secondary aerosol formation, industry, and traffic respectively; (f)~(j) are the OP derived from coal combustion for residential heating, biomass burning, secondary aerosol formation, industry, and traffic respectively.”

Fang, T., Guo, H., Zeng, L., Verma, V., Nenes, A., Weber, R.J. (2017). Highly Acidic Ambient Particles, Soluble Metals, and Oxidative Potential: A Link between Sulfate and Aerosol Toxicity. *Environ Sci Technol*, 51, 2611-2620. <https://doi.org/10.1021/acs.est.6b06151>.

Liu, W., Xu, Y., Liu, W., Liu, Q., Yu, S., Liu, Y., Wang, X., Tao, S. (2018). Oxidative potential of ambient PM<sub>2.5</sub> in the coastal cities of the Bohai Sea, northern China: Seasonal variation and source apportionment. *Environ Pollut*, 236, 514-528. <https://doi.org/10.1016/j.envpol.2018.01.116>.

Liu, W., Xu, Y., Liu, W., Liu, Q., Yu, S., Liu, Y., Wang, X., Tao, S. (2018). Oxidative potential of ambient PM<sub>2.5</sub> in the coastal cities of the Bohai Sea, northern China: Seasonal variation and source apportionment. *Environ Pollut*, 236, 514-528. <https://doi.org/10.1016/j.envpol.2018.01.116>.

MEE. (2015). China Vehicle Emission Control Annual Report. <https://www.mee.gov.cn/hjzl/sthjzk/ydyhjgl/201605/P020160513584304398771.pdf>. Accessed 11 January, 2023.

Molina, C., Manzano, C.A., Toro A., R., Leiva G, M.A. (2023). The oxidative potential of airborne particulate matter in two urban areas of Chile: More than meets the eye. *Environ Int*, 173, 107866. <https://doi.org/10.1016/j.envint.2023.107866>.

13. Section 3.4 provides good conclusions and interesting points but does not complete the analysis of their model output to explain the results. Instead of going into detail on each panel shown in Figure 10, I suggest highlighting what is learned. What I learned is that secondary aerosol formation is the primary contributor to PM<sub>2.5</sub>, while biomass burning and industrial sources each contribute moderately to PM<sub>2.5</sub> and residential and traffic emissions are small (negligible?) contributions. I also learned that residential burning has more of an impact on the oxidative potential because it is weighted more (based on equation 1) than the other terms. What I did not learn is why secondary aerosol formation is the largest contributor to PM<sub>2.5</sub> and oxidative potential. Are precursor emissions much greater than PM<sub>2.5</sub> emissions? What role do oxidants play in controlling secondary aerosol formation? As a consequence of this result, should studies on source attribution to oxidative potential focus on precursor emissions and their source sectors? I did not see any DEHM results focused on carbonaceous aerosols or metals and the oxidative potential equation does not make use of that information. Although these aerosols are key culprits affecting human health, I do not understand

why the text about biomass combustion, coal burning, and traffic emissions discusses these details without supporting information from the DEHM results.

**Response:** We sincerely apologize for any confusion caused by our insufficiently clear explanations regarding the spatial distribution of contributions from various anthropogenic sources. In response to your suggestion, we have thoroughly revised the discussion of the spatial distribution maps, incorporating information from DEHM model outputs, model configurations, and the OP prediction equations (**Please see Pages 21-24**). The comments have been answered in detail in the following order:

**First**, we apologize for any confusion you may have had about the contributions of the various emission sectors due to our lack of clarity. To address this, we have swapped the positions of the percentage contribution map (Figure 11) and the spatial distribution maps (Figure 10). By presenting the percentage contribution map first, we clarify the extent of influence of each emission sector on PM<sub>2.5</sub> concentration and

OP. Subsequently, we explain the reasons for spatial contribution differences through the spatial distribution maps. As depicted in the percentage contribution map, the percentage contributions of secondary aerosol formation, biomass burning, industrial sectors, coal combustion for residential heating, and transportation to  $PM_{2.5}$  concentration are 48%, 21%, 21%, 6%, and 4%, respectively. Similarly, the percentage contributions of secondary aerosol formation, biomass burning, coal combustion for residential heating, industrial sectors, and transportation to OP are 58%, 21%, 11%, 9%, and 1%, respectively. Despite the relatively low contributions from coal combustion for residential heating and transportation sectors, attention is still required due to their emission contributions.

**Second**, it can be seen from Figure 11 that the main reason that secondary aerosol formation is the main anthropogenic source of both  $PM_{2.5}$  concentrations and OP in China is due to the higher pollution levels, more contributions to mass, and toxicity in the central and eastern regions. Relevant study (Molina et al., 2023) has highlighted the significant contribution of secondary aerosol formation to particle mass and intrinsic OP. In this study, *se* represents the sum of concentrations of secondary organic aerosols (SOA) and secondary inorganic aerosols (SIA), which we define as secondary aerosol formation. The DEHM model does not consider all sources of  $PM_{2.5}$  emissions. For example, as outlined in Sections 2.2 and Sections 3.4, the transportation sector only considers tailpipe emissions and coal combustion represents only the part used for residential heating during cold seasons. The contribution results in Figures 10 and 11 are based on the anthropogenic emission sources that we considered. Therefore, further investigation is needed to determine whether precursor emissions are larger than  $PM_{2.5}$  emissions, based on a more comprehensive consideration of anthropogenic sources. As understood, the main components of *se* (such as sulfate, nitrate, ammonium, and water-soluble organic carbon) are primarily formed through atmospheric reactions of precursor species (such as  $SO_2$ ,  $NO_x$ , and volatile organic compounds). This implies that controlling precursor emissions would be beneficial in reducing the concentrations of SOA and SIA. Given the anthropogenic source types considered and the results obtained, enhancing research on precursor emissions and their source sectors in China would be advantageous in reducing OP.

**Third**, following your suggestion, we have comprehensively discussed the spatial contribution differences of various anthropogenic sources by integrating the output results of the DEHM model, model configurations, and relevant information regarding the OP prediction equation (**Please see Pages 21-24**). Due to Chinese crops, especially corn straw, and power plants are mainly concentrated in central and eastern regions, northeast and part of the western region, as well as the bigger intrinsic OP (Equation (1)), this results in biomass burning becoming the second contribution. In this study, coal combustion refers to coal heating from the residential sector. According to Equation (1), OP is determined by both intrinsic OP and emissions. Although the intrinsic OP weight of coal combustion for local cold-season heating is high, the total emissions from this source are relatively low. Therefore, the contribution of coal combustion for local cold-season heating is smaller than that of secondary aerosols and biomass burning. While our study did not separately analyze the contributions of carbonaceous aerosols or metals, we attempted to explain the main reasons for the contribution of industrial processes based on the simulation results. China's four industrial zones (Liaozhong-South Heavy Industry Base, Beijing-Tianjin-Tangshan Industrial Base, Shanghai-Nanjing-Hangzhou Industrial Base, and Pearl River Delta Light Industry Base) are important contributors to  $PM_{2.5}$  and OP emissions from industrial sources. These areas are predominantly steel industry bases, with more  $PM_{2.5}$  emissions from industrial sources. We speculate that metals from the steel industry bases are a major factor contributing to the high OP from industrial sources. Furthermore, we surveyed previous studies (Fang et al., 2017; Liu et al., 2018), which confirmed that metals are indeed the primary factors contributing to industrial  $PM_{2.5}$ /OP emissions. The transportation sector in the DEHM model only considers tailpipe emissions,

excluding non-exhaust emissions from vehicles like road dust, brake dust, and tire wear, which is a main reason that the traffic sources exhibit the lowest contribution to PM<sub>2.5</sub> concentrations/OP. Moreover, it can be observed from Figure 11 that the sector's emissions are mainly concentrated in a small number of regions, such as Henan, Hebei, and Shandong. This is valid for the top three provinces in terms of vehicle particulate matter and nitrogen oxide emissions in 2014 according to China Annual Vehicle Pollution Prevention and Control Report (MEE, 2015).

The detailed revisions in the manuscript are shown below:

### 3.4 Contribution of anthropogenic emission sources to PM<sub>2.5</sub> and OP (Pages 21-24):

“To determine the impact of anthropogenic emissions on PM<sub>2.5</sub> and OP, we quantified their percent contribution (Figure 10). Secondary aerosol formation, biomass burning, industrial, coal combustion for residential heating, and transportation sources contributed 48%, 21%, 21%, 6% and 4% to PM<sub>2.5</sub>, respectively. Secondary aerosol formation, biomass burning, coal combustion for residential heating, industrial sources, and transportation sources contributed 58%, 21%, 11%, 9% and 1% to OP, respectively. This means that secondary aerosol formation and biomass burning are the main sources of PM<sub>2.5</sub> and OP.

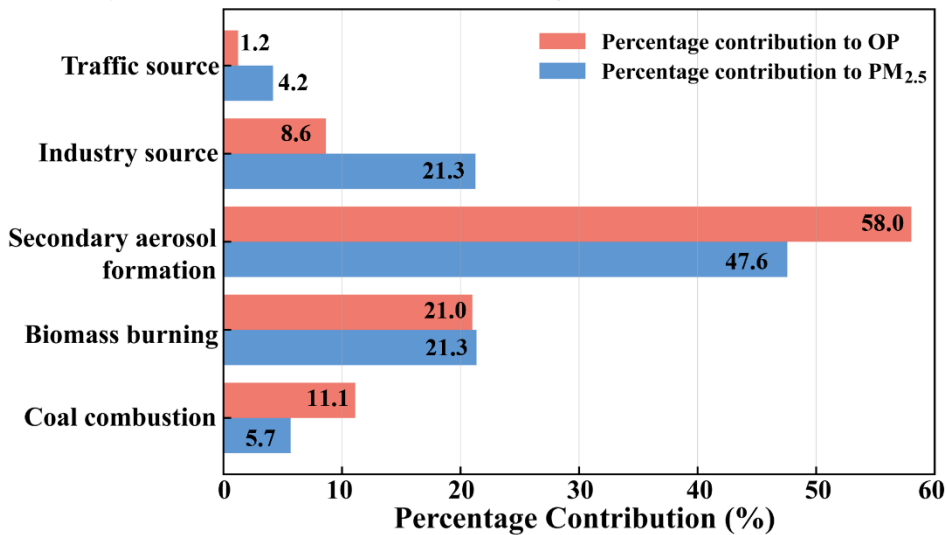

Figure 10. Percentage contribution of different anthropogenic sources (coal combustion for residential heating, biomass burning, secondary aerosol formation, industry, and traffic) to total PM<sub>2.5</sub> concentrations and OP for China in 2014 under scenario C<sub>1</sub>.

Thus, we explored the spatial distribution characteristics of PM<sub>2.5</sub> and OP from different anthropogenic sources to reveal the spatial contributions of PM<sub>2.5</sub> concentrations and OP, as shown in Figure 11. It was observed that the spatial distribution features of PM<sub>2.5</sub> concentrations and OP from each emission source are similar to those in Figure 6, and they all adhere to the principle that the eastern region is higher than the western.

It can be seen from Figure 11 that the main reason that secondary aerosol formation is the main anthropogenic source of both PM<sub>2.5</sub> concentrations and OP in China is due to the higher pollution levels, more contributions to mass, and toxicity in the central and eastern regions. Relevant study (Molina et al., 2023) has highlighted the significant contribution of secondary aerosol formation to particle mass and intrinsic OP.

Due to Chinese crops, especially corn straw, and power plants are mainly concentrated in central and eastern regions, northeast and part of the western region, as well as the bigger intrinsic OP (Equation (1)), this results in biomass burning becoming the second contribution.

In this study, coal combustion refers to coal heating from the residential sector. Coal burning increases secondary inorganic and organic aerosols in the air (Liu et al., 2018) which leads to stronger oxidative toxicity.

Thus, due to greater heating demand in locations with high population density and chilly winters (e.g., the northern part of the central and eastern China),  $PM_{2.5}$  concentrations and OP linked to coal burning are higher.

Industrial emissions are mainly derived from specific industrial processes in the iron and steel industrial base, metallurgical production plants for non-ferrous metals (e.g., titanium and molybdenum), and so on. This is one main source for metals. Due to the correlation between these transition metals and OP (Fang et al., 2017; Liu et al., 2018), China's four industrial zones (Liaozhong-South Heavy Industry Base, Beijing-Tianjin-Tangshan Industrial Base, Shanghai-Nanjing-Hangzhou Industrial Base, and Pearl River Delta Light Industry Base) are important contributors to  $PM_{2.5}$  and OP emissions from industrial sources.

The transportation sector in the DEHM model only considers tailpipe emissions, excluding non-exhaust emissions from vehicles like road dust, brake dust, and tire wear, which is a main reason that the traffic sources exhibit the lowest contribution to  $PM_{2.5}$  concentrations/OP. Moreover, it can be observed from Figure 11 that the sector's emissions are mainly concentrated in a small number of regions, such as Henan, Hebei, and Shandong. This is valid for the top three provinces in terms of vehicle particulate matter and nitrogen oxide emissions in 2014 according to China Annual Vehicle Pollution Prevention and Control Report (MEE, 2015).

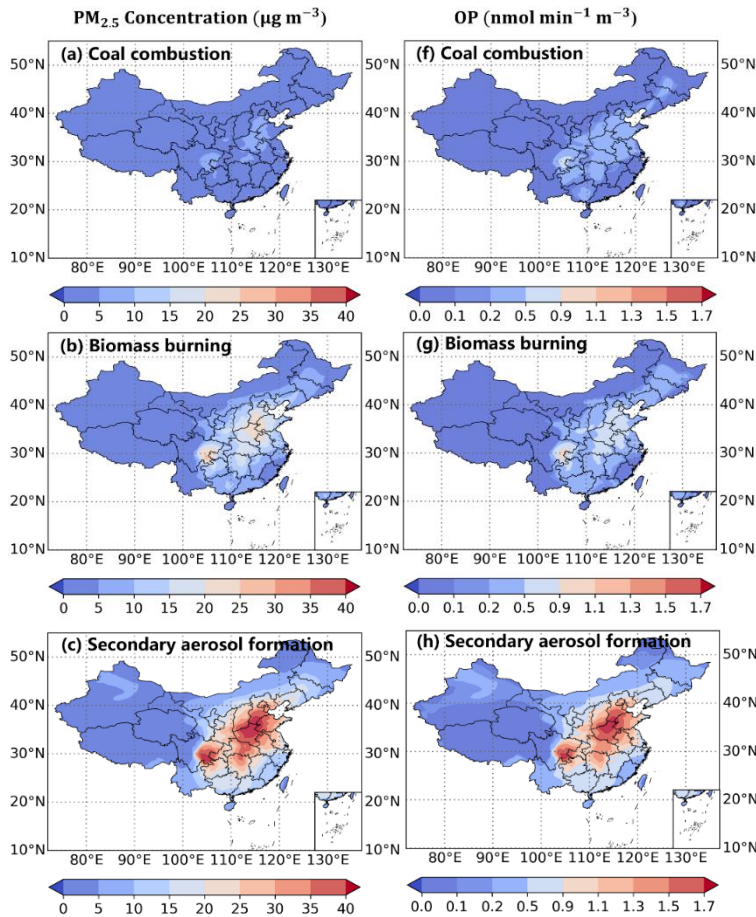



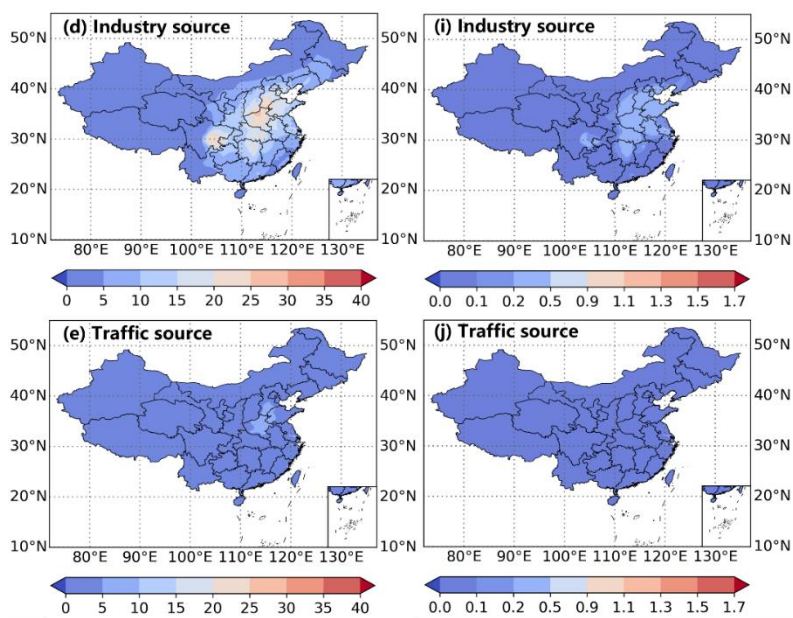

Figure 11. Spatial distribution of annual mean  $PM_{2.5}$  concentrations and annual mean OP from different anthropogenic sources for China in 2014 under scenario  $C_1$ ; (a)~(e) are  $PM_{2.5}$  concentrations derived from coal combustion for residential heating, biomass burning, secondary aerosol formation, industry, and traffic respectively; (f)~(j) are the OP derived from coal combustion for residential heating, biomass burning, secondary aerosol formation, industry, and traffic respectively.”

Fang, T., Guo, H., Zeng, L., Verma, V., Nenes, A., Weber, R.J. (2017). Highly Acidic Ambient Particles, Soluble Metals, and Oxidative Potential: A Link between Sulfate and Aerosol Toxicity. *Environ Sci Technol*, 51, 2611-2620. <https://doi.org/10.1021/acs.est.6b06151>.

Liu, W., Xu, Y., Liu, W., Liu, Q., Yu, S., Liu, Y., Wang, X., Tao, S. (2018). Oxidative potential of ambient  $PM_{2.5}$  in the coastal cities of the Bohai Sea, northern China: Seasonal variation and source apportionment. *Environ Pollut*, 236, 514-528. <https://doi.org/10.1016/j.envpol.2018.01.116>.

Liu, W., Xu, Y., Liu, W., Liu, Q., Yu, S., Liu, Y., Wang, X., Tao, S. (2018). Oxidative potential of ambient  $PM_{2.5}$  in the coastal cities of the Bohai Sea, northern China: Seasonal variation and source apportionment. *Environ Pollut*, 236, 514-528. <https://doi.org/10.1016/j.envpol.2018.01.116>.

MEE. (2015). China Vehicle Emission Control Annual Report. <https://www.mee.gov.cn/hjzl/sthjzk/ydyhjgl/201605/P020160513584304398771.pdf>. Accessed 11 January, 2023.

Molina, C., Manzano, C.A., Toro A., R., Leiva G, M.A. (2023). The oxidative potential of airborne particulate matter in two urban areas of Chile: More than meets the eye. *Environ Int*, 173, 107866. <https://doi.org/10.1016/j.envint.2023.107866>.

## Organization, Clarity, Technical Comments

1. Lines 29-31. Please write this sentence more clearly: meteorological conditions contributed 46% and 65% to PM<sub>2.5</sub> concentrations and oxidative potential, respectively, while anthropogenic emissions contributed 54% and 35% to PM<sub>2.5</sub> concentrations and oxidative potential, respectively.

**Response:** Thank you very much for your constructive comments. Following your suggestion, we have rewritten the sentence. The detailed revisions in the manuscript are shown below:

“Analysis of the simulations indicate that meteorological conditions contributed 46% and 65% to PM<sub>2.5</sub> concentrations and OP variability, respectively, while anthropogenic emissions contributed 54% and 35% to PM<sub>2.5</sub> concentrations and OP variability, respectively.” (Page 2)

2. Line 87. “combing” should be “combining”.

**Response:** Thank you very much for your constructive comments. Following your suggestion, we have modified the term. The detailed revisions in the manuscript are shown below:

“For this, we propose a hybrid approach combining existing observations of OP with a chemistry transport model (CTM)” (Page 4)

3. Line 105. Please explain further how the DTT measurements are brought into this study. Do you mean via the positive matrix factorization done in a previous study?

**Response:** Thank you very much for your constructive comments. Liu et al. (2018) first used the PM<sub>2.5</sub> chemical compositional data set to obtain the quantitative contribution of different emission sources to PM<sub>2.5</sub> mass concentrations. Then, the contributions of different PM<sub>2.5</sub> sources acquired from the positive matrix factorization analysis were applied, as the independent variables (in concentration unit), to establish a multiple linear regression equation that accounted for DTT<sub>v</sub> activity. Finally, A prediction model of OP was obtained (Equation (1)). In this study, the spatial-scale estimation of OP was estimated by incorporating simulated values of primary and secondary PM<sub>2.5</sub> concentrations from various anthropogenic sources into Equation (1). Following your suggestion, we have rewritten the sentence. The detailed revisions in the manuscript are shown below:

“From these simulations, the spatial-scale estimation of OP was estimated by incorporating simulated values of primary and secondary PM<sub>2.5</sub> concentrations from various anthropogenic sources into Equation (1) (see Sect.2.2 for detail).” (Page 5)

Liu, W., Xu, Y., Liu, W., Liu, Q., Yu, S., Liu, Y., Wang, X., Tao, S. (2018). Oxidative potential of ambient PM<sub>2.5</sub> in the coastal cities of the Bohai Sea, northern China: Seasonal variation and source apportionment. *Environ Pollut*, 236, 514-528. <https://doi.org/10.1016/j.envpol.2018.01.116>.

4. Section 2. I think it would be good to reorganize the section. Currently section 2.3 interrupts the discussion of model simulations in 2.2 and 2.4. Perhaps the explanation of oxidative potential could be presented first followed by the control and sensitivity simulation configurations.

**Response:** Thank you very much for your constructive comments. Following your suggestion, we first present the estimation of the OP (Sect. 2.2) and then describe the configuration of the DEHM model (Sect. 2.3).

The detailed revisions in the manuscript are shown below (Please see Pages 6-8):

“2.2 Estimation of OP

Most of current data on OP of PM<sub>2.5</sub> in China are obtained by means of measurement, and the research objects are basically limited to specific cities, which to some extent hinders the conduct of research on OP in a large-scale region. Considering that Liu et al. (2018) collected samples across four seasons from multiple representative locations in China, their developed OP prediction model (Equation (1)) can support us in estimating OP (with a unit of  $nmol\ min^{-1}\ m^{-3}$ ) in China, thereby exploring the spatial distribution characteristics of OP and the contributions of different anthropogenic sources to OP. In the present study, we have used this relationship, in combination with the sensitivity simulations (Sect. 2.4), to calculate the OP.

$$OP = 0.088 \times re + 0.076 \times bi + 0.041 \times se + 0.034 \times in + 0.017 \times tr \quad (1)$$

where, *re*, *bi*, *in*, and *tr* represent the primary PM<sub>2.5</sub> concentrations (with a unit of  $\mu g\ m^{-3}$ ) for coal combustion, biomass burning, industry source, and transportation source, respectively. *se* (secondary aerosol formation) refers to the concentrations of secondary organic and inorganic (SOA and SIA, respectively) components (with a unit of  $\mu g\ m^{-3}$ ). In this study, the coal combustion refers to coal heating from the residential sector. Biomass burning includes open burning of agricultural biomass, domestic biomass burning for cooking and heating, and biomass burning from biomass power plants and coal-fired power plants. Industry source is mainly derived from specific industrial processes in the iron and steel industrial base, metallurgical production plants for non-ferrous metals (e.g., titanium and molybdenum), and so on. Transportation source primarily comes from tailpipe emissions. It's worth mentioning that secondary aerosol formation originates from a series of atmospheric reactions. Some identified sources (i.e., coal combustion, biomass burning, industrial processes, and transportation) may generate secondary inorganic and organic aerosols through the emission of their precursor components. The coefficient (with a unit of  $nmol\ min^{-1}\ m^{-3}\ source^{-1}$ ) reflect the intrinsic OP of each source.

### 2.3 Model setup

The DEHM can well capture many features of PM and its precursors' changes in large-scale space (Christensen, 1997; Brandt et al., 2012; Im et al., 2019). To date, the DEHM model has been widely used in air pollution and health risk assessment research in Europe and Asia (Brandt et al., 2013a; b; Zare et al., 2014; Geels et al., 2015; Im et al., 2018; Im et al., 2019; Lehtomäki et al., 2020; Cramer et al., 2020; Liu et al., 2021; Geels et al., 2021; Thomas et al., 2022; Im et al., 2023), but this will be the first time that DEHM is applied to estimate OP. Thus, The DEHM model system was used to simulate the pollutant concentrations in 2014 by using a two-way nested domain in this study (Kumar et al., 2016). A mother domain with a resolution of 150 km × 150 km was employed on a polar stereographic projection, true at 60°N to cover the entire Northern Hemisphere. The nested domain covered the whole of China consisting of 150 × 150 grid cells with a resolution of 50 km × 50 km, which was used for the analysis. The mother domain provided initial and boundary conditions for the nested domain. Vertically, there were 29 unevenly distributed layers, with the highest level reaching 100 hPa, and the lowest layer was approximately 20 m in height. The meteorological fields were simulated using the WRF model (Skamarock et al., 2008) with the same domain and resolution driven by global meteorological data obtained from the ERA5 dataset and the Community Earth System Model (CESM) global model, respectively. The simulations utilized the Revised MM5 surface layer scheme, the Yonsei University (YSU) boundary layer parameterization scheme (Hong et al., 2006), the Multi-scale Kain-Fritsch cumulus parameterization scheme (Zheng et al., 2016), the CAM longwave radiation scheme, the CAM shortwave radiation scheme (Skamarock et al., 2021), etc. The gas-phase chemistry module included 66 species, 9 primary particles (including natural particles such as sea salt), and 138 chemical reactions and was based on the scheme by Strand et al. (1994) (Brandt et al., 2012). The gas-phase species considered in this study included SO<sub>2</sub>, NO<sub>2</sub>, CH<sub>4</sub>, C<sub>2</sub>H<sub>6</sub>, etc. PM<sub>2.5</sub> was formed by BC, OC, sea salt, ammonium (NH<sub>4</sub><sup>+</sup>), nitrate (NO<sub>3</sub><sup>-</sup>), sulfate (SO<sub>4</sub><sup>2-</sup>), and secondary organic aerosols (SOA), among others

(Frohn et al., 2022). Biogenic volatile organic compounds (BVOCs), such as isoprene, contributed to the formation of SOA (Zare et al., 2012). Further details on the configuration of the chemical scheme and the list of chemical reactions can refer to the literature (Zare et al., 2012; Brandt et al., 2012; Collin, 2020; Frohn et al., 2022). The SOA were calculated using the volatility basis set (see details in Im et al. (2019)). In addition to the anthropogenic emissions, DEHM also includes emissions from biogenic emissions, such as vegetation, sea salt, lightning, soil, etc. The current version of the DEHM model does not include wind-blown, resuspended dust emissions or road dust. The time resolution of the DEHM model output is one hour.

In the current study, the DEHM model used anthropogenic emissions from the Emissions Database for Global Atmospheric Research – Hemispheric Transport of Air Pollution (EDGAR-HTAP) database and Eclipse V6. The biomass burning emissions are obtained from the Global Fire Assimilation System (GFAS) from ECMWF (Kaiser et al., 2012), which has a horizontal resolution of a  $0.1^\circ \times 0.1^\circ$  on a daily time basis. Natural emissions for DEHM are based on the Global Emissions Initiative (GEIA, Zare et al., 2012; Frost et al., 2013) with monthly inventories for emissions of nitrogen oxides from soil and lightning, and annual inventories for emissions of ammonia from natural sources. The production of sea salt (Soares et al., 2016) and biogenic volatile organic compounds (Zare et al., 2014) are calculated online in the model as a function of meteorological parameters like wind speed and temperature (Frohn et al., 2022).”

Brandt, J., Silver, J.D., Christensen, J.H., Andersen, M.S., B O N I O Kke, J.H., Sigsgaard, T., Geels, C., Gross, A., Hansen, A.B., Hansen, K.M., Hedegaard, G.B., Kaas, E., Frohn, L.M. (2013a). Contribution from the ten major emission sectors in Europe and Denmark to the health-cost externalities of air pollution using the EVA model system – an integrated modelling approach. *Atmos Chem Phys*, 13, 7725-7746. <https://doi.org/10.5194/acp-13-7725-2013>.

Brandt, J., Silver, J.D., Christensen, J.H., Andersen, M.S., B O N I O Kke, J.H., Sigsgaard, T., Geels, C., Gross, A., Hansen, A.B., Hansen, K.M., Hedegaard, G.B., Kaas, E., Frohn, L.M. (2013b). Assessment of past, present and future health-cost externalities of air pollution in Europe and the contribution from international ship traffic using the EVA model system. *Atmos Chem Phys*, 13, 7747-7764. <https://doi.org/10.5194/acp-13-7747-2013>.

Brandt, J., Silver, J.D., Frohn, L.M., Geels, C., Gross, A., Hansen, A.B., Hansen, K.M., Hedegaard, G.B., Skjøth, C.A., Villadsen, H., Zare, A., Christensen, J.H. (2012). An integrated model study for Europe and North America using the Danish Eulerian Hemispheric Model with focus on intercontinental transport of air pollution. *Atmos Environ (1994)*, 53, 156-176. <https://doi.org/10.1016/j.atmosenv.2012.01.011>.

Christensen, J.H. (1997). The Danish eulerian hemispheric model — a three-dimensional air pollution model used for the arctic. *Atmos Environ (1994)*, 31, 4169-4191. [https://doi.org/10.1016/S1352-2310\(97\)00264-1](https://doi.org/10.1016/S1352-2310(97)00264-1).

Collin, G. (2020). Regional Production, Updated documentation covering all Regional operational systems and the ENSEMBLE. [https://atmosphere.copernicus.eu/sites/default/files/2020-01/CAMS50\\_2018SC1\\_D2.0.2-U1\\_Models\\_documentation\\_201910\\_v1.pdf](https://atmosphere.copernicus.eu/sites/default/files/2020-01/CAMS50_2018SC1_D2.0.2-U1_Models_documentation_201910_v1.pdf). Accessed.

Cramer, J., Jorgensen, J.T., Hoffmann, B., Loft, S., Brauner, E.V., Prescott, E., Ketzler, M., Hertel, O., Brandt, J., Jensen, S.S., Backalarz, C., Simonsen, M.K., Andersen, Z.J. (2020). Long-Term Exposure to Air Pollution and Incidence of Myocardial Infarction: A Danish Nurse Cohort Study. *Environ Health Perspect*, 128. <https://doi.org/10.1289/EHP5818>.

Frohn, L.M., Geels, C., Andersen, C., Andersson, C., Bennet, C., Christensen, J.H., Im, U., Karvosenoja, N., Kindler, P.A., Kukkonen, J., Lopez-Aparicio, S., Nielsen, O., Palamarchuk, Y., Paunu, V., Plejdrup, M.S., Segersson, D., Sofiev, M., Brandt, J. (2022). Evaluation of multidecadal high-resolution atmospheric chemistry-transport modelling for exposure assessments in the continental Nordic countries. *Atmos Environ (1994)*, 290, 119334. <https://doi.org/10.1016/j.atmosenv.2022.119334>.

Frost, G.J., Middleton, P., Tarrasón, L., Granier, C., Guenther, A., Cardenas, B., Denier Van Der Gon, H.,

- Janssens-Maenhout, G., Kaiser, J.W., Keating, T., Klimont, Z., Lamarque, J., Lioussé, C., Nickovic, S., Ohara, T., Schultz, M.G., Skiba, U., van Aardenne, J., Wang, Y. (2013). New Directions: GEIA's 2020 vision for better air emissions information. *Atmos Environ (1994)*, 81, 710-712. <https://doi.org/10.1016/j.atmosenv.2013.08.063>.
- Geels, C., Andersson, C., Hänninen, O., Lansø, A.S., Schwarze, P.E., Skjøth, C.A., Brandt, J. (2015). Future Premature Mortality Due to O<sub>3</sub>, Secondary Inorganic Aerosols and Primary PM in Europe — Sensitivity to Changes in Climate, Anthropogenic Emissions, Population and Building Stock. *International Journal of Environmental Research and Public Health*, 12, 2837-2869. <https://doi.org/10.3390/ijerph120302837>.
- Geels, C., Winther, M., Andersson, C., Jalkanen, J.P., Brandt, J., Frohn, L.M., Im, U., Leung, W., Christensen, J.H. (2021). Projections of shipping emissions and the related impact on air pollution and human health in the Nordic region. *Atmos Chem Phys*, 21, 12495-12519. <https://doi.org/10.5194/acp-21-12495-2021>.
- Hong, S., Noh, Y., Dudhia, J. (2006). A New Vertical Diffusion Package with an Explicit Treatment of Entrainment Processes. *Mon Weather Rev*, 134, 2318-2341. <https://doi.org/10.1175/MWR3199.1>.
- Im, U., Bauer, S.E., Frohn, L.M., Geels, C., Tsigaridis, K., Brandt, J. (2023). Present-day and future PM<sub>2.5</sub> and O<sub>3</sub>-related global and regional premature mortality in the EVA<sub>v6.0</sub> health impact assessment model. *Environ Res*, 216, 114702. <https://doi.org/10.1016/j.envres.2022.114702>.
- Im, U., Brandt, J., Geels, C., Hansen, K.M., Christensen, J.H., Andersen, M.S., Solazzo, E., Kioutsioukis, I., Alyuz, U., Balzarini, A., Baro, R., Bellasio, R., Bianconi, R., Bieser, J., Colette, A., Curci, G., Farrow, A., Flemming, J., Fraser, A., Jimenez-Guerrero, P., Kitwiroon, N., Liang, C.K., Nopmongkol, U., Pirovano, G., Pozzoli, L., Prank, M., Rose, R., Sokhi, R., Tuccella, P., Unal, A., Vivanco, M.G., West, J., Yarwood, G., Hogrefe, C., Galmarini, S. (2018). Assessment and economic valuation of air pollution impacts on human health over Europe and the United States as calculated by a multi-model ensemble in the framework of AQMEII3. *Atmos Chem Phys*, 18, 5967-5989. <https://doi.org/10.5194/acp-18-5967-2018>.
- Im, U., Christensen, J.H., Nielsen, O.K., Sand, M., Makkonen, R., Geels, C., Anderson, C., Kukkonen, J., Lopez-Aparicio, S., Brandt, J. (2019). Contributions of Nordic anthropogenic emissions on air pollution and premature mortality over the Nordic region and the Arctic. *Atmos Chem Phys*, 19, 12975-12992. <https://doi.org/10.5194/acp-19-12975-2019>.
- Kaiser, J.W., Heil, A., Andreae, M.O., Benedetti, A., Chubarova, N., Jones, L., Morcrette, J.J., Razinger, M., Schultz, M.G., Suttie, M., van der Werf, G.R. (2012). Biomass burning emissions estimated with a global fire assimilation system based on observed fire radiative power. *Biogeosciences*, 9, 527-554. <https://doi.org/10.5194/bg-9-527-2012>.
- Kumar, A., Patil, R.S., Dikshit, A.K., Kumar, R., Brandt, J., Hertel, O. (2016). Assessment of impact of unaccounted emission on ambient concentration using DEHM and AERMOD in combination with WRF. *Atmos Environ (1994)*, 142, 406-413. <https://doi.org/10.1016/j.atmosenv.2016.08.024>.
- Lehtomäki, H., Geels, C., Brandt, J., Rao, S., Yaramenka, K., Åström, S., Andersen, M.S., Frohn, L.M., Im, U., Hänninen, O. (2020). Deaths Attributable to Air Pollution in Nordic Countries: Disparities in the Estimates. *Atmosphere (Basel)*, 11. <https://doi.org/10.3390/atmos11050467>.
- Liu, S., Lim, Y., Pedersen, M., Jørgensen, J.T., Amini, H., Cole-Hunter, T., Mehta, A.J., So, R., Mortensen, L.H., Westendorp, R.G.J., Loft, S., Bräuner, E.V., Ketzler, M., Hertel, O., Brandt, J., Jensen, S.S., Christensen, J.H., Sigsgaard, T., Geels, C., Frohn, L.M., Brborić, M., Radonić, J., Sekulic, M.T., Bønnelykke, K., Backalarz, C., Simonsen, M.K., Andersen, Z.J. (2021). Long-term exposure to ambient air pollution and road traffic noise and asthma incidence in adults: The Danish Nurse cohort. *Environ Int*, 152, 106464. <https://doi.org/10.1016/j.envint.2021.106464>.
- Liu, W., Xu, Y., Liu, W., Liu, Q., Yu, S., Liu, Y., Wang, X., Tao, S. (2018). Oxidative potential of ambient PM<sub>2.5</sub> in the coastal cities of the Bohai Sea, northern China: Seasonal variation and source apportionment. *Environ Pollut*, 236, 514-528. <https://doi.org/10.1016/j.envpol.2018.01.116>.
- Skamarock, W.C., Klemp, J.B., Dudhia, J., Gill, D.O., Barker, D.M., Duda, M.G., Huang, X., Wang, W., Powers, J.G. (2008). A description of the advanced research WRF version 3. *NCAR technical note*, 475,

113. <http://dx.doi.org/10.5065/D68S4MVH>.

Skamarock, W.C., Klemp, J.B., Dudhia, J., Gill, D.O., Liu, Z., Berner, J., Huang, X.Y. (2021). A Description of the Advanced Research WRF Model Version 4.3 (No. NCAR/TN-556+STR). <http://dx.doi.org/10.5065/1dfh-6p97>.

Soares, J., Sofiev, M., Geels, C., Christensen, J.H., Andersson, C., Tsyro, S., Langner, J. (2016). Impact of climate change on the production and transport of sea salt aerosol on European seas. *Atmos Chem Phys*, 16, 13081-13104. <https://doi.org/10.5194/acp-16-13081-2016>.

Strand, A., Hov, Ø. (1994). A two-dimensional global study of tropospheric ozone production. *Journal of Geophysical Research: Atmospheres*, 99, 22877-22895. <https://doi.org/10.1029/94JD01945>.

Thomas, D.C., Christensen, J.H., Massling, A., Pernov, J.B., Skov, H. (2022). The effect of the 2020 COVID-19 lockdown on atmospheric black carbon levels in northeastern Greenland. *Atmos Environ (1994)*, 269, 118853. <https://doi.org/10.1016/j.atmosenv.2021.118853>.

Zare, A., Christensen, J.H., Gross, A., Irannejad, P., Glasius, M., Brandt, J. (2014). Quantifying the contributions of natural emissions to ozone and total fine PM concentrations in the Northern Hemisphere. *Atmos Chem Phys*, 14, 2735-2756. <https://doi.org/10.5194/acp-14-2735-2014>.

Zare, A., Christensen, J.H., Irannejad, P., Brandt, J. (2012). Evaluation of two isoprene emission models for use in a long-range air pollution model. *Atmos Chem Phys*, 12, 7399-7412. <https://doi.org/10.5194/acp-12-7399-2012>.

Zheng, Y., Alapaty, K., Herwehe, J.A., Del Genio, A.D., Niyogi, D. (2016). Improving High-Resolution Weather Forecasts Using the Weather Research and Forecasting (WRF) Model with an Updated Kain-Fritsch Scheme. *Mon Weather Rev*, 144, 833-860. <https://doi.org/10.1175/MWR-D-15-0005.1>.

5. Section 2.2, meteorology setup. Please give more detail. I assume the nested domain at 50 km x 50 km horizontal grid spacing was used for the analysis, but this was not stated explicitly. I also assume that the outer domain provided initial and boundary conditions for the nested domain, but it was not stated. Was there a spin-up period for the simulations before conducting the analysis for 2014? How frequently was the meteorology data updated to reanalysis (or nudged to reanalysis)? Why was ERA5 chosen to drive the WRF model and not another global reanalysis product like MERRA or NCEP?

**Response:** Thank you very much for your constructive comments. The comments have been answered in detail in the following order:

**First**, following your suggestion, we have stated in Section 2.3 that the nested domain with a horizontal grid spacing of 50 km × 50 km was employed for analysis. Furthermore, we have elaborated on how the outer domain provided initial conditions and boundary conditions for the nested domain (**Please see Page 7**).

**Second**, to minimize the impact of initial conditions, a spin-up period was configured for the simulations. In this study, the meteorological input files required by the DEHM model were generated using WRF driven by either ERA5 reanalysis datasets or global meteorological data output by CESM. Therefore, the frequency of meteorological data updates to the reanalysis (or nudged to the reanalysis) depends on the specific meteorological data utilized.

**Third**, studies (Thomas et al., 2021; Xu et al., 2022) have demonstrated that ERA5 performs well relative to MERRA, NCEP, and ERA-Interim, with higher temporal and spatial resolutions. Therefore, this study chose ERA5 to drive the WRF model. Considering the sensitivity experiments regarding meteorological conditions and emissions outlined in Section 2.4.1, we elucidate here the reasons for the selection of ERA5 (**Please see Page 8**).

The detailed revisions in the manuscript are shown below:

**Materials and methods:**

“The nested domain covered the whole of China consisting of  $150 \times 150$  grid cells with a resolution of 50 km  $\times$  50 km, which was used for the analysis. The mother domain provided initial and boundary conditions for the nested domain.” (Page 7)

“Table 1 summarizes the scenarios for assessing the relative contributions of meteorological conditions and emissions to PM<sub>2.5</sub> and OP variability in 2014. ERA5 (Hersbach et al., 2020; ERA, 2023) is a global reanalysis dataset that is based on the assimilation of historical observations and model data. Studies (Thomas et al., 2021; Xu et al., 2022) have demonstrated that ERA5 performs well relative to MERRA, NCEP, and ERA-Interim, with higher temporal and spatial resolutions. Therefore, Scenarios C<sub>1</sub> and C<sub>2</sub> used ERA5 as input to WRF. Considering the robust representation of aerosol effective radiative forcing and good predictive capabilities for key surface variables in CESM (2023) (García-Martínez et al., 2020; Richter et al., 2022), Scenario C<sub>3</sub> utilized meteorological data based on CESM version 2.1.1 (Danabasoglu et al., 2020) climate model as input for WRF. Scenarios C<sub>2</sub> and C<sub>3</sub> employed the Eclipse V6 emissions inventory, while Scenario C<sub>1</sub> used the EDGAR-HTAP inventory.” (Page 8)

CESM. (2023). Community Earth System Model. <https://www.cesm.ucar.edu/>. Accessed 7 May, 2023.

Danabasoglu, G., Lamarque, J.F., Bacmeister, J., Bailey, D.A., DuVivier, A.K., Edwards, J., Emmons, L.K., Fasullo, J., Garcia, R., Gettelman, A., Hannay, C., Holland, M.M., Large, W.G., Lauritzen, P.H., Lawrence, D.M., Lenaerts, J.T.M., Lindsay, K., Lipscomb, W.H., Mills, M.J., Neale, R., Oleson, K.W., Otto-Bliesner, B., Phillips, A.S., Sacks, W., Tilmes, S., van Kampenhout, L., Vertenstein, M., Bertini, A., Dennis, J., Deser, C., Fischer, C., Fox-Kemper, B., Kay, J.E., Kinnison, D., Kushner, P.J., Larson, V.E., Long, M.C., Mickelson, S., Moore, J.K., Nienhouse, E., Polvani, L., Rasch, P.J., Strand, W.G. (2020). The Community Earth System Model Version 2 (CESM2). *J Adv Model Earth Syst*, 12, e2019MS001916. <https://doi.org/10.1029/2019MS001916>.

ERA. (2023). ECMWF Reanalysis v5. <https://www.ecmwf.int/en/forecasts/dataset/ecmwf-reanalysis-v5>. Accessed 22 May, 2023.

García-Martínez, I.M., Bollasina, M.A., Undorf, S. (2020). Strong large-scale climate response to North American sulphate aerosols in CESM. *Environ Res Lett*, 15, 114051. <https://iopscience.iop.org/article/10.1088/1748-9326/abbe45>.

Hersbach, H., Bell, B., Berrisford, P., Hirahara, S., Horányi, A., Muñoz-Sabater, J., Nicolas, J., Peubey, C., Radu, R., Schepers, D., Simmons, A., Soci, C., Abdalla, S., Abellan, X., Balsamo, G., Bechtold, P., Biavati, G., Bidlot, J., Bonavita, M., De Chiara, G., Dahlgren, P., Dee, D., Diamantakis, M., Dragani, R., Flemming, J., Forbes, R., Fuentes, M., Geer, A., Haimberger, L., Healy, S., Hogan, R.J., Hólm, E., Janisková, M., Keeley, S., Laloyaux, P., Lopez, P., Lupu, C., Radnoti, G., de Rosnay, P., Rozum, I., Vamborg, F., Villaume, S., Thépaut, J. (2020). The ERA5 global reanalysis. *Q J R Meteorol Soc*, 146, 1999-2049. <https://doi.org/10.1002/qj.3803>.

Richter, J.H., Glanville, A.A., Edwards, J., Kauffman, B., Davis, N.A., Jaye, A., Kim, H., Pedatella, N.M., Sun, L., Berner, J., Kim, W.M., Yeager, S.G., Danabasoglu, G., Caron, J.M., Oleson, K.W. (2022). Subseasonal Earth System Prediction with CESM2. *Weather Forecast*, 37, 797-815. <https://doi.org/10.1175/WAF-D-21-0163.1>.

Thomas, S.R., Nicolau, S., Martínez-Alvarado, O., Drew, D.J., Bloomfield, H.C. (2021). How well do atmospheric reanalyses reproduce observed winds in coastal regions of Mexico? *Meteorol Appl*, 28, e2023. <https://doi.org/10.1002/met.2023>.

Xu, X., Frey, S.K., Ma, D. (2022). Hydrological performance of ERA5 and MERRA-2 precipitation products over the Great Lakes Basin. *Journal of Hydrology: Regional Studies*, 39, 100982. <https://doi.org/10.1016/j.ejrh.2021.100982>.

6. Section 2.2, chemistry configuration. It would be useful to give a description of the gas-phase chemistry and how PM<sub>2.5</sub> is formed. For example, what hydrocarbons are included that would contribute to SOA formation? What sulfur chemistry and nitrogen oxides chemistry are represented that make sulfate and nitrate aerosol? Consider including the list of chemical reactions in the supplement. Are the aerosols represented with a bulk aerosol scheme?

**Response:** Thank you very much for your constructive comments. The gas-phase species considered in this study included SO<sub>2</sub>, NO<sub>2</sub>, CH<sub>4</sub>, C<sub>2</sub>H<sub>6</sub>, etc. PM<sub>2.5</sub> was formed by BC, OC, sea salt, ammonium (NH<sub>4</sub><sup>+</sup>), nitrate (NO<sub>3</sub><sup>-</sup>), sulfate (SO<sub>4</sub><sup>2-</sup>), and secondary organic aerosols (SOA), among others (Frohn et al., 2022). Biogenic volatile organic compounds (BVOCs), such as isoprene, contributed to the formation of SOA (Zare et al., 2012). Considering that the configuration of the specific chemical scheme and the list of chemical reactions have been described in detail in previous work (Zare et al., 2012; Brandt et al., 2012; Collin, 2020; Frohn et al., 2022), in order to respect the efforts and achievements of previous research, appropriate citations have been included in the main text. Additionally, the basic chemical scheme in DEHM was based on the scheme by Strand et al. (1994). In accordance with your suggestion, corresponding modifications have been made to Section 2.3 (**Please see Page 7**).

The detailed revisions in the manuscript are shown below:

**Materials and methods (Page 7):**

“The gas-phase chemistry module included 66 species, 9 primary particles (including natural particles such as sea salt), and 138 chemical reactions and was based on the scheme by Strand et al. (1994) (Brandt et al., 2012). The gas-phase species considered in this study included SO<sub>2</sub>, NO<sub>2</sub>, CH<sub>4</sub>, C<sub>2</sub>H<sub>6</sub>, etc. PM<sub>2.5</sub> was formed by BC, OC, sea salt, ammonium (NH<sub>4</sub><sup>+</sup>), nitrate (NO<sub>3</sub><sup>-</sup>), sulfate (SO<sub>4</sub><sup>2-</sup>), and secondary organic aerosols (SOA), among others (Frohn et al., 2022). Biogenic volatile organic compounds (BVOCs), such as isoprene, contributed to the formation of SOA (Zare et al., 2012). Further details on the configuration of the chemical scheme and the list of chemical reactions can refer to the literature (Zare et al., 2012; Brandt et al., 2012; Collin, 2020; Frohn et al., 2022).”

Strand, A., Hov, Ø. (1994). A two-dimensional global study of tropospheric ozone production. *Journal of Geophysical Research: Atmospheres*, 99, 22877-22895. <https://doi.org/10.1029/94JD01945>.

Brandt, J., Silver, J.D., Frohn, L.M., Geels, C., Gross, A., Hansen, A.B., Hansen, K.M., Hedegaard, G.B., Skjøth, C.A., Villadsen, H., Zare, A., Christensen, J.H. (2012). An integrated model study for Europe and North America using the Danish Eulerian Hemispheric Model with focus on intercontinental transport of air pollution. *Atmos Environ (1994)*, 53, 156-176. <https://doi.org/10.1016/j.atmosenv.2012.01.011>.

Collin, G. (2020). Regional Production, Updated documentation covering all Regional operational systems and the ENSEMBLE. [https://atmosphere.copernicus.eu/sites/default/files/2020-01/CAMS50\\_2018SC1\\_D2.0.2-U1\\_Models\\_documentation\\_201910\\_v1.pdf](https://atmosphere.copernicus.eu/sites/default/files/2020-01/CAMS50_2018SC1_D2.0.2-U1_Models_documentation_201910_v1.pdf). Accessed.

Frohn, L.M., Geels, C., Andersen, C., Andersson, C., Bennet, C., Christensen, J.H., Im, U., Karvosenoja, N., Kindler, P.A., Kukkonen, J., Lopez-Aparicio, S., Nielsen, O., Palamarchuk, Y., Paunu, V., Plejdrup, M.S., Segersson, D., Sofiev, M., Brandt, J. (2022). Evaluation of multidecadal high-resolution atmospheric chemistry-transport modelling for exposure assessments in the continental Nordic countries. *Atmos Environ (1994)*, 290, 119334. <https://doi.org/10.1016/j.atmosenv.2022.119334>.

Zare, A., Christensen, J.H., Irannejad, P., Brandt, J. (2012). Evaluation of two isoprene emission models for use in a long-range air pollution model. *Atmos Chem Phys*, 12, 7399-7412. <https://doi.org/10.5194/acp-12-7399-2012>.



7. Section 2.2, emissions. I suggest giving short descriptions of each emissions source: How are biogenic emissions, sea salt emission, lightning emissions calculated and what are they emitting? Is biomass burning from wildfires included? For anthropogenic emissions, it states EDGAR-HTAP is used, but it does not include a description of what that inventory emits and what grid spacing the inventory has. Yet, in section 2.4 there is a paragraph giving that information for the ECLIPSE emissions. It would be good to have similar information about each inventory so that the reader can better understand why there may be differences between simulation C1 and simulation C2. Especially useful would be to report the emission inventories' annual values for China for PM<sub>2.5</sub> and key precursors (e.g. SO<sub>2</sub>) as this will provide quantitative information on how EDGAR-HTAP and Eclipse differ.

**Response:** Thank you very much for your constructive comments. The comments have been answered in detail in the following order:

**First**, following your suggestion, we have provided a brief description of each emission source (**Please see Page 8**).

**Second**, during the simulation process, we included all biomass-burning sources, including wildfires, agricultural burning, and biofuel combustion.

**Third**, following your suggestion, we have added the description of emissions from Eclipse v6 and EDGAR-HTAP inventories and grid spacing of the inventories in Section 2.4.1 (**Please see Pages 8-9**).

**Fourth**, your suggestion is excellent. It would be more helpful to provide annual emission inventories for Chinese PM<sub>2.5</sub> and key precursors (such as sulfur dioxide) under two scenarios. However, these two inventories are from different official sources, and their inventory emission types and values do not correspond one-to-one. This discrepancy results in the PM<sub>2.5</sub> outcomes being determined by the entire inventory. Reporting only the annual values for Chinese PM<sub>2.5</sub> and key precursors (such as sulfur dioxide) from these two inventories might give the impression of neglecting the role of other emissions in PM<sub>2.5</sub> formation. To avoid misunderstandings among readers and considering the difficulty in statistical comparison, we refrained from quantifying specific emissions. Additionally, we have provided inventory links, which include detailed information for each pollutant.

The detailed revisions in the manuscript are shown below:

**Materials and methods:**

“In the current study, the DEHM model used anthropogenic emissions from the Emissions Database for Global Atmospheric Research – Hemispheric Transport of Air Pollution (EDGAR-HTAP) database and Eclipse V6. The biomass burning emissions are obtained from the Global Fire Assimilation System (GFAS) from ECMWF (Kaiser et al., 2012), which has a horizontal resolution of a  $0.1^\circ \times 0.1^\circ$  on a daily time basis. Natural emissions for DEHM are based on the Global Emissions Initiative (GEIA, Zare et al., 2012; Frost et al., 2013) with monthly inventories for emissions of nitrogen oxides from soil and lightning, and annual inventories for emissions of ammonia from natural sources. The production of sea salt (Soares et al., 2016) and biogenic volatile organic compounds (Zare et al., 2014) are calculated online in the model as a function of meteorological parameters like wind speed and temperature (Frohn et al., 2022).” (**Page 8**)

“The ECLIPSE project by the International Institute for Applied Systems Analysis (IIASA) aims to generate a global gridded anthropogenic emission inventory for various emission scenarios. The Greenhouse Gas - Air Pollution Interactions and Synergies (GAINS) model has been employed to estimate emissions of air pollutants and GHGs (such as SO<sub>2</sub>, NO<sub>x</sub>, NH<sub>3</sub>, NMVOC, BC, OC, OM, PM<sub>2.5</sub>, PM<sub>10</sub>, CO, CH<sub>4</sub>) using source characteristics and emission factors at a resolution of  $0.5^\circ \times 0.5^\circ$  latitude-longitude (Upadhyay et al., 2020; Eclipse, 2020). The following sector-layers are available: energy, industry, solvent use, transport, domestic combustion, agriculture, open burning of agricultural waste, waste treatment. a number of scenarios are

provided for which the key economic assumptions and energy use originate from IEA World Energy Outlook (IEA, 2011), the POLES model, or Energy Technology Perspectives (IEA, 2012) for the period 2010-2050, while statistical data for the period 1990-2010 came from IEA. For agriculture the FAO databases and long-term global projections were used (Alexandratos et al., 2012). It is noteworthy that this inventory considers China's 13th 5-year plan. The EDGAR-HTAP (Joint et al., 2011; Crippa et al., 2023) emission inventory endeavors to employ official or scientific inventories within a national or regional scale, with a spatial resolution of  $0.1^\circ \times 0.1^\circ$ . EDGAR-HTAP comprehensively accounts for all major emission sectors, including residential, transportation, industrial, energy, and agricultural sectors. EDGAR offers independent emission estimates for various pollutants, including CO, CH<sub>4</sub>, SO<sub>2</sub>, NO<sub>x</sub>, NMVOC, NH<sub>3</sub>, PM<sub>2.5</sub>, PM<sub>10</sub>, BC, and OC. These estimates follow a standardized methodology provided by the Intergovernmental Panel on Climate Change (IPCC). The data from EDGAR allows for comparisons with emission reports published by European Member States or Parties under the United Nations Framework Convention on Climate Change (UNFCCC) (Kumar et al., 2023).” **(Please see Pages 8-9)**

Alexandratos, N., Bruinsma, J., 2012. World agriculture towards 2030/2050, the 2012 revision (No. No. 12-03), ESA Working Paper. World Food and Agricultural Organization, Rome, Italy.

Crippa, M., Guizzardi, D., Butler, T., Keating, T., Wu, R., Kaminski, J., Kuenen, J., Kurokawa, J., Chatani, S., Morikawa, T., Pouliot, G., Racine, J., Moran, M.D., Klimont, Z., Manseau, P.M., Mashayekhi, R., Henderson, B.H., Smith, S.J., Suchyta, H., Muntean, M., Solazzo, E., Banja, M., Schaaf, E., Pagani, F., Woo, J.H., Kim, J., Monforti-Ferrario, F., Pisoni, E., Zhang, J., Niemi, D., Sassi, M., Ansari, T., Foley, K. (2023). The HTAP\_v3 emission mosaic: merging regional and global monthly emissions (2000--2018) to support air quality modelling and policies. *Earth Syst Sci Data*, 15, 2667-2694. <https://doi.org/10.5194/essd-15-2667-2023>.

Eclipse. (2020). Global emission fields of air pollutants and GHGs. <https://iiasa.ac.at/models-tools-data/global-emission-fields-of-air-pollutants-and-ghgs>. Accessed 7 May, 2023.

Frohn, L.M., Geels, C., Andersen, C., Andersson, C., Bennet, C., Christensen, J.H., Im, U., Karvosenoja, N., Kindler, P.A., Kukkonen, J., Lopez-Aparicio, S., Nielsen, O., Palamarchuk, Y., Paunu, V., Plejdrup, M.S., Segersson, D., Sofiev, M., Brandt, J. (2022). Evaluation of multidecadal high-resolution atmospheric chemistry-transport modelling for exposure assessments in the continental Nordic countries. *Atmos Environ (1994)*, 290, 119334. <https://doi.org/10.1016/j.atmosenv.2022.119334>.

Frost, G.J., Middleton, P., Tarrasón, L., Granier, C., Guenther, A., Cardenas, B., Denier Van Der Gon, H., Janssens-Maenhout, G., Kaiser, J.W., Keating, T., Klimont, Z., Lamarque, J., Liousse, C., Nickovic, S., Ohara, T., Schultz, M.G., Skiba, U., van Aardenne, J., Wang, Y. (2013). New Directions: GEIA's 2020 vision for better air emissions information. *Atmos Environ (1994)*, 81, 710-712. <https://doi.org/10.1016/j.atmosenv.2013.08.063>.

IEA, 2011. World Energy Outlook 2011. International Energy Agency, Paris, France.

IEA, 2012. Energy Technology Perspectives. 2012 - Pathways to a Clean Energy System. OECD/IEA, International Energy Agency, Paris.

Joint, R.C., Institute, F.E.A.S., Orlandini, L., Kurokawa, J., Monni, S., Akimoto, H., Grano, D., Battye, B., Zuber, A., Pagliari, V., Janssens-Maenhout, G., Van Aardenne, J., Dentener, F., Keating, T., Klimont, Z., Wankmüller, R., Ohara, T. (2011). EDGAR-HTAP – A harmonized gridded air pollution emission dataset based on national inventories. <https://pure.iiasa.ac.at/id/eprint/10114/>.

Kaiser, J.W., Heil, A., Andreae, M.O., Benedetti, A., Chubarova, N., Jones, L., Morcrette, J.J., Razinger, M., Schultz, M.G., Suttie, M., van der Werf, G.R. (2012). Biomass burning emissions estimated with a global fire assimilation system based on observed fire radiative power. *Biogeosciences*, 9, 527-554. <https://doi.org/10.5194/bg-9-527-2012>.

Kumar, P., Beig, G., Singh, V., Sahu, S.K., Siingh, D., Bamniya, B.R. (2023). Model simulation of carbonaceous fine particulate matter using SAFAR emission inventory and comparison with EDGAR-

HTAP simulations. *Atmos Environ* (1994), 315, 120147. <https://doi.org/10.1016/j.atmosenv.2023.120147>.

Soares, J., Sofiev, M., Geels, C., Christensen, J.H., Andersson, C., Tsyro, S., Langner, J. (2016). Impact of climate change on the production and transport of sea salt aerosol on European seas. *Atmos Chem Phys*, 16, 13081-13104. <https://doi.org/10.5194/acp-16-13081-2016>.

Upadhyay, A., Dey, S., Goyal, P. (2020). A comparative assessment of regional representativeness of EDGAR and ECLIPSE emission inventories for air quality studies in India. *Atmos Environ* (1994), 223, 117182. <https://doi.org/10.1016/j.atmosenv.2019.117182>.

Zare, A., Christensen, J.H., Gross, A., Irannejad, P., Glasius, M., Brandt, J. (2014). Quantifying the contributions of natural emissions to ozone and total fine PM concentrations in the Northern Hemisphere. *Atmos Chem Phys*, 14, 2735-2756. <https://doi.org/10.5194/acp-14-2735-2014>.

Zare, A., Christensen, J.H., Irannejad, P., Brandt, J. (2012). Evaluation of two isoprene emission models for use in a long-range air pollution model. *Atmos Chem Phys*, 12, 7399-7412. <https://doi.org/10.5194/acp-12-7399-2012>.

8. Line 152. Please add *se* and its definition.

**Response:** Thank you very much for your constructive comments. Following your suggestion, we have added *se* and its definition. The detailed revisions in the manuscript are shown below:

“where, *re*, *bi*, *in*, and *tr* represent the primary PM<sub>2.5</sub> concentrations (with a unit of  $\mu\text{g m}^{-3}$ ) for coal combustion, biomass burning, industry source, and transportation source, respectively. *se* (secondary aerosol formation) refers to the concentrations of secondary organic and inorganic (SOA and SIA, respectively) components (with a unit of  $\mu\text{g m}^{-3}$ ).” (Page 6)

9. Line 155. “Industry source is primarily from specific industry processes” is not providing any insight as to what kind of industry or specific types of emissions. Please give more information.

**Response:** Thank you very much for your constructive comments. In this study, the selection and limitation of anthropogenic emission sources are determined by the anthropogenic sources in the OP prediction model (Equation (1)) developed by Liu et al. (2018). Therefore, following your suggestion and Liu et al. (2018)'s research, we have provided additional information regarding industrial sources.

The detailed revisions in the manuscript are shown below:

“Industry source is mainly derived from specific industrial processes in the iron and steel industrial base, metallurgical production plants for non-ferrous metals (e.g., titanium and molybdenum), and so on.” (Page 6)

Liu, W., Xu, Y., Liu, W., Liu, Q., Yu, S., Liu, Y., Wang, X., Tao, S. (2018). Oxidative potential of ambient PM<sub>2.5</sub> in the coastal cities of the Bohai Sea, northern China: Seasonal variation and source apportionment. *Environ Pollut*, 236, 514-528. <https://doi.org/10.1016/j.envpol.2018.01.116>.

10. Section 2.4.1. There are a number of reanalysis datasets available (e.g., ERA5, MERRA, NCEP FNL). Why were ERA5 and CESM chosen?

**Response:** Thank you very much for your constructive comments. We have elaborated on the reasons for choosing ERA5 and CESM in Section 2.4.1 of the study. The detailed revisions in the manuscript are shown below:

“Table 1 summarizes the scenarios for assessing the relative contributions of meteorological conditions and emissions to PM<sub>2.5</sub> and OP variability in 2014. ERA5 (Hersbach et al., 2020; ERA, 2023) is a global reanalysis dataset that is based on the assimilation of historical observations and model data. Studies (Thomas et al.,

2021; Xu et al., 2022) have demonstrated that ERA5 performs well relative to MERRA, NCEP, and ERA-Interim, with higher temporal and spatial resolutions. Therefore, Scenarios C<sub>1</sub> and C<sub>2</sub> used ERA5 as input to WRF. Considering the robust representation of aerosol effective radiative forcing and good predictive capabilities for key surface variables in CESM (2023) (García-Martínez et al., 2020; Richter et al., 2022), Scenario C<sub>3</sub> utilized meteorological data based on CESM version 2.1.1 (Danabasoglu et al., 2020) climate model as input for WRF. Scenarios C<sub>2</sub> and C<sub>3</sub> employed the Eclipse V6 emissions inventory, while Scenario C<sub>1</sub> used the EDGAR-HTAP inventory.” (Page 8)

CESM. (2023). Community Earth System Model. <https://www.cesm.ucar.edu/>. Accessed 7 May, 2023.

Danabasoglu, G., Lamarque, J.F., Bacmeister, J., Bailey, D.A., DuVivier, A.K., Edwards, J., Emmons, L.K., Fasullo, J., Garcia, R., Gettelman, A., Hannay, C., Holland, M.M., Large, W.G., Lauritzen, P.H., Lawrence, D.M., Lenaerts, J.T.M., Lindsay, K., Lipscomb, W.H., Mills, M.J., Neale, R., Oleson, K.W., Otto-Bliessner, B., Phillips, A.S., Sacks, W., Tilmes, S., van Kampenhout, L., Vertenstein, M., Bertini, A., Dennis, J., Deser, C., Fischer, C., Fox-Kemper, B., Kay, J.E., Kinnison, D., Kushner, P.J., Larson, V.E., Long, M.C., Mickelson, S., Moore, J.K., Nienhouse, E., Polvani, L., Rasch, P.J., Strand, W.G. (2020). The Community Earth System Model Version 2 (CESM2). *J Adv Model Earth Syst*, 12, e2019MS001916. <https://doi.org/10.1029/2019MS001916>.

ERA. (2023). ECMWF Reanalysis v5. <https://www.ecmwf.int/en/forecasts/dataset/ecmwf-reanalysis-v5>. Accessed 22 May, 2023.

García-Martínez, I.M., Bollasina, M.A., Undorf, S. (2020). Strong large-scale climate response to North American sulphate aerosols in CESM. *Environ Res Lett*, 15, 114051. <https://iopscience.iop.org/article/10.1088/1748-9326/abbe45>.

Hersbach, H., Bell, B., Berrisford, P., Hirahara, S., Horányi, A., Muñoz-Sabater, J., Nicolas, J., Peubey, C., Radu, R., Schepers, D., Simmons, A., Soci, C., Abdalla, S., Abellan, X., Balsamo, G., Bechtold, P., Biavati, G., Bidlot, J., Bonavita, M., De Chiara, G., Dahlgren, P., Dee, D., Diamantakis, M., Dragani, R., Flemming, J., Forbes, R., Fuentes, M., Geer, A., Haimberger, L., Healy, S., Hogan, R.J., Hólm, E., Janisková, M., Keeley, S., Laloyaux, P., Lopez, P., Lupu, C., Radnoti, G., de Rosnay, P., Rozum, I., Vamborg, F., Villaume, S., Thépaut, J. (2020). The ERA5 global reanalysis. *Q J R Meteorol Soc*, 146, 1999-2049. <https://doi.org/10.1002/qj.3803>.

Richter, J.H., Glanville, A.A., Edwards, J., Kauffman, B., Davis, N.A., Jaye, A., Kim, H., Pedatella, N.M., Sun, L., Berner, J., Kim, W.M., Yeager, S.G., Danabasoglu, G., Caron, J.M., Oleson, K.W. (2022). Subseasonal Earth System Prediction with CESM2. *Weather Forecast*, 37, 797-815. <https://doi.org/10.1175/WAF-D-21-0163.1>.

Thomas, S.R., Nicolau, S., Martínez-Alvarado, O., Drew, D.J., Bloomfield, H.C. (2021). How well do atmospheric reanalyses reproduce observed winds in coastal regions of Mexico? *Meteorol Appl*, 28, e2023. <https://doi.org/10.1002/met.2023>.

Xu, X., Frey, S.K., Ma, D. (2022). Hydrological performance of ERA5 and MERRA-2 precipitation products over the Great Lakes Basin. *Journal of Hydrology: Regional Studies*, 39, 100982. <https://doi.org/10.1016/j.ejrh.2021.100982>.

#### 11. Line 167. “reanalyse” should be “reanalysis”

**Response:** Thank you for your correction. Taking into account your previous comments, we have reorganized this section accordingly. The detailed revisions in the manuscript are shown below:

“Table 1 summarizes the scenarios for assessing the relative contributions of meteorological conditions and emissions to PM<sub>2.5</sub> and OP variability in 2014. ERA5 (Hersbach et al., 2020; ERA, 2023) is a global reanalysis dataset that is based on the assimilation of historical observations and model data. Studies (Thomas et al., 2021; Xu et al., 2022) have demonstrated that ERA5 performs well relative to MERRA, NCEP, and ERA-Interim, with higher temporal and spatial resolutions. Therefore, Scenarios C<sub>1</sub> and C<sub>2</sub> used ERA5 as input to

WRF.” (Page 8)

ERA. (2023). ECMWF Reanalysis v5. <https://www.ecmwf.int/en/forecasts/dataset/ecmwf-reanalysis-v5>. Accessed 22 May, 2023.

Hersbach, H., Bell, B., Berrisford, P., Hirahara, S., Horányi, A., Muñoz-Sabater, J., Nicolas, J., Peubey, C., Radu, R., Schepers, D., Simmons, A., Soci, C., Abdalla, S., Abellan, X., Balsamo, G., Bechtold, P., Biavati, G., Bidlot, J., Bonavita, M., De Chiara, G., Dahlgren, P., Dee, D., Diamantakis, M., Dragani, R., Flemming, J., Forbes, R., Fuentes, M., Geer, A., Haimberger, L., Healy, S., Hogan, R.J., Hólm, E., Janisková, M., Keeley, S., Laloyaux, P., Lopez, P., Lupu, C., Radnoti, G., de Rosnay, P., Rozum, I., Vamborg, F., Villaume, S., Thépaut, J. (2020). The ERA5 global reanalysis. *Q J R Meteorol Soc*, 146, 1999-2049. <https://doi.org/10.1002/qj.3803>.

12. Line 172. “was first ran” should be “was first run”

**Response:** Thank you for your correction. Taking into account your previous comments, we have reorganized this section accordingly. The detailed revisions in the manuscript are shown below:

“Considering the robust representation of aerosol effective radiative forcing and good predictive capabilities for key surface variables in CESM (2023) (García-Martínez et al., 2020; Richter et al., 2022), Scenario C3 utilized meteorological data based on CESM version 2.1.1 (Danabasoglu et al., 2020) climate model as input for WRF.” (Page 8)

CESM. (2023). Community Earth System Model. <https://www.cesm.ucar.edu/>. Accessed 7 May, 2023.

Danabasoglu, G., Lamarque, J.F., Bacmeister, J., Bailey, D.A., DuVivier, A.K., Edwards, J., Emmons, L.K., Fasullo, J., Garcia, R., Gettelman, A., Hannay, C., Holland, M.M., Large, W.G., Lauritzen, P.H., Lawrence, D.M., Lenaerts, J.T.M., Lindsay, K., Lipscomb, W.H., Mills, M.J., Neale, R., Oleson, K.W., Otto-Bliesner, B., Phillips, A.S., Sacks, W., Tilmes, S., van Kampenhout, L., Vertenstein, M., Bertini, A., Dennis, J., Deser, C., Fischer, C., Fox-Kemper, B., Kay, J.E., Kinnison, D., Kushner, P.J., Larson, V.E., Long, M.C., Mickelson, S., Moore, J.K., Nienhouse, E., Polvani, L., Rasch, P.J., Strand, W.G. (2020). The Community Earth System Model Version 2 (CESM2). *J Adv Model Earth Syst*, 12, e2019MS001916. <https://doi.org/10.1029/2019MS001916>.

García-Martínez, I.M., Bollasina, M.A., Undorf, S. (2020). Strong large-scale climate response to North American sulphate aerosols in CESM. *Environ Res Lett*, 15, 114051. <https://iopscience.iop.org/article/10.1088/1748-9326/abbe45>.

Richter, J.H., Glanville, A.A., Edwards, J., Kauffman, B., Davis, N.A., Jaye, A., Kim, H., Pedatella, N.M., Sun, L., Berner, J., Kim, W.M., Yeager, S.G., Danabasoglu, G., Caron, J.M., Oleson, K.W. (2022). Subseasonal Earth System Prediction with CESM2. *Weather Forecast*, 37, 797-815. <https://doi.org/10.1175/WAF-D-21-0163.1>.

13. Line 195. I suggest putting the sentence, “abs represents the absolute value” at the end of the paragraph, and rewrite to something more readable, e.g. “In the equations, the abs function represents the absolute value of the quantity in parentheses.”

**Response:** Thank you very much for your constructive comments. Following your suggestion, we have added explanations for abs and the abs function. The detailed revisions in the manuscript are shown below:

“abs represents the absolute value. In the equations, the abs function represents the absolute value of the quantity in parentheses.” (Page 10)

14. Line 203. I suggest using “described” instead of “proposed”.

**Response:** Thank you very much for your constructive comments. Following your suggestion, we have used “described” instead of “proposed”. The detailed revisions in the manuscript are shown below:

“These experiments were carried out within the three scenarios described in Section 2.4.1” (Page 10)

15. Line 225. Change “More and more” to “Previous”.

**Response:** Thank you very much for your constructive comments. Following your suggestion, we have changed “More and more” to “Previous”. The detailed revisions in the manuscript are shown below:

“Previous studies (Hodan et al., 2004; Chen et al., 2018; Zhang et al., 2022) showed that in China, the proportion of secondary and primary PM<sub>2.5</sub> mass to the total PM<sub>2.5</sub> mass is close, so we assume that they account for 50% respectively” (Page 11)

Chen, P., Wang, T., Kasoar, M., Xie, M., Li, S., Zhuang, B., Li, M. (2018). Source Apportionment of PM<sub>2.5</sub> during Haze and Non-Haze Episodes in Wuxi, China. *Atmosphere (Basel)*, 9, 267. <https://doi.org/10.3390/atmos9070267>.

Hodan, W.M., Barnard, W.R. (2004). Evaluating the contribution of PM<sub>2.5</sub> precursor gases and re-entrained road emissions to mobile source PM<sub>2.5</sub> particulate matter emissions. *MACTEC Federal Programs, Research Triangle Park, NC*. <https://www3.epa.gov/ttnchie1/conference/ei13/mobile/hodan.pdf>.

Zhang, H., Li, N., Tang, K., Liao, H., Shi, C., Huang, C., Wang, H., Guo, S., Hu, M., Ge, X. (2022). Estimation of secondary PM<sub>2.5</sub> in China and the United States using a multi-tracer approach. *Atmos Chem Phys*, 22, 5495-5514. <https://doi.org/10.5194/acp-2021-683>.

16. Line 257. Please maintain the same verb tense. I suggest “are mainly ... are limited”.

**Response:** Thank you very much for your constructive comments. Following your suggestion, we have modified the verb tense. The detailed revisions in the manuscript are shown below:

“In 2014, the observation stations are mainly concentrated in eastern China, while stations in western China are limited.” (Page 13)

17. Line 263. Change “were” to “are”.

**Response:** Thank you very much for your constructive comments. Following your suggestion, we have changed “were” to “are”. The detailed revisions in the manuscript are shown below:

“The density scatter plot of model performance and evaluation for China in scenario C<sub>1</sub> based on annual mean PM<sub>2.5</sub> observations from MEE and PM<sub>2.5</sub> derived from the Dalhousie dataset are shown in Figure 3.” (Page 13)

18. Section 3.1. Please specify which model domain is being evaluated.

**Response:** Thank you very much for your constructive comments. Following your advice, we have specified the model domain for evaluation in Section 3.1. The detailed revisions in the manuscript are shown below:

“The density scatter plot of model performance and evaluation for China in scenario C<sub>1</sub> based on annual mean PM<sub>2.5</sub> observations from MEE and PM<sub>2.5</sub> derived from the Dalhousie dataset are shown in Figure 3.” (Page 13)

19. Line 275. Is it MME or MEE?

**Response:** We sincerely apologize for the oversight in incorrectly stating the data source as "MME." We have now corrected it to "MEE." The detailed revisions in the manuscript are shown below:

“To verify the spatial accuracy, a comparison of the spatial distribution of simulated and observed PM<sub>2.5</sub>, both from MEE and Dalhousie, was conducted.” (Page 14)

20. Diff\_si-ob is used to express the difference between simulated and observed values. The way this term is written implies that it equals the simulation value minus the observations value. However, the values in Figure 4 appear to be observations minus simulated values. Could the authors clean up the terminology please.

**Response:** Thank you very much for your constructive comments. We have clarified the meaning of  $diff_{si-ob}$  in the main text and rewritten the caption for Figure 4 accordingly. The detailed revisions in the manuscript are shown below:

“Figure 4 showed the spatial distribution of the annual mean simulated minus annual mean observed values (denoted as  $diff_{si-ob}$ ) (Figure 4a), as well as the spatial distribution of the annual mean simulated values minus the Dalhousie dataset (denoted as  $diff_{si-DH}$ ) (Figure 4b).” (Page 14)

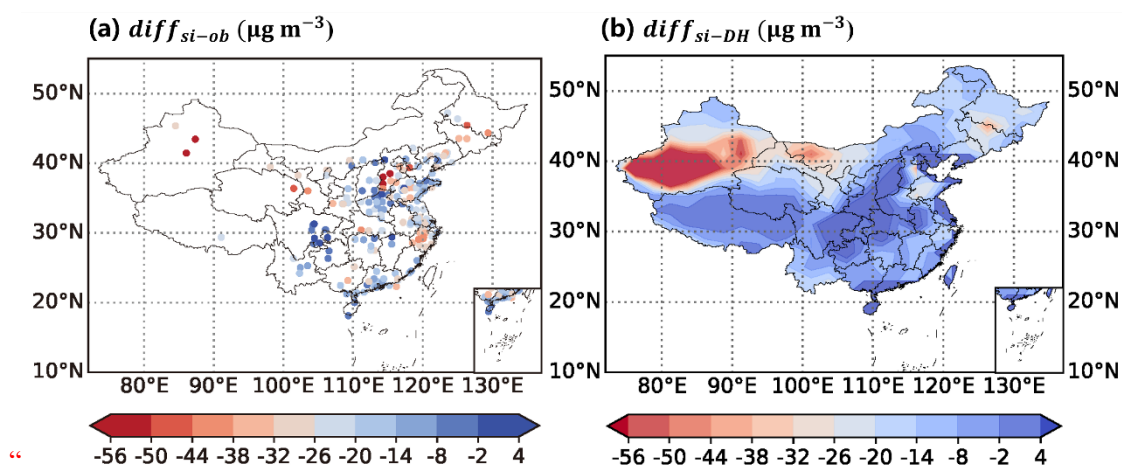

Figure 4. Spatial distribution of the annual mean simulated minus annual mean observed values (a), as well as the spatial distribution of the annual mean simulated values minus the Dalhousie dataset (b) for China in 2014 under scenario C1.” (Page 15)

21. Line 293. Change “are” to “were.

**Response:** Thank you very much for your constructive comments. In accordance with your previous comments, we have rewritten the section discussing the performance of the model on a temporal scale. The detailed revisions in the manuscript are shown below:

“Similarly, the model performance over time scales was also investigated. Scatter density plots and distribution characteristics of monthly average observations and simulations for all monitoring sites in 2014 were depicted in Figure S1 and Figure 5, respectively. From Figure 5, it can be observed that the simulated values closely align with the observed values from April to September. However, in other months, there was a slightly poorer alignment between simulated and observed values. Nonetheless, considering the overall performance throughout the year, as analyzed in conjunction with Figure S1, it can be deduced that both the correlation R and NME met the performance criteria suggested by Emery et al. (2017) for all months except December. Furthermore, the results in Figure 4 indicated that the bias across various regions in DEHM is acceptable. Consequently, on an aggregate level for China, the model demonstrates acceptable performance in simulating monthly average  $PM_{2.5}$  concentrations.” (Page 15)

Emery, C., Liu, Z., Russell, A.G., Odman, M.T., Yarwood, G., Kumar, N. (2017). Recommendations on statistics and benchmarks to assess photochemical model performance. *J Air Waste Manag Assoc*, 67, 582-598. <https://doi-org.ez.statsbiblioteket.dk/10.1080/10962247.2016.1265027>.

22. Line 293-294. Remove “with Figure S1a ... December”.

**Response:** Thank you very much for your constructive comments. Following your advice, we have removed “with Figure S1a ... December”. The detailed revisions in the manuscript are shown below:

“Scatter density plots and distribution characteristics of monthly average observations and simulations for all monitoring sites in 2014 were depicted in Figure S1 and Figure 5, respectively.” (Page 15)

23. Line 306-307. First sentence needs to be written better to something like: To learn about the spatial distributions of PM<sub>2.5</sub> concentrations and OP, we plot maps of surface PM<sub>2.5</sub> and OP for scenario C1 (Figure 6).

**Response:** Thank you very much for your constructive comments. Following your advice, we have rewritten the first sentence. The detailed revisions in the manuscript are shown below:

“To learn about the spatial distributions of PM<sub>2.5</sub> concentrations and OP, we plot maps of surface PM<sub>2.5</sub> and OP for scenario C<sub>1</sub> (Figure 6a and 6b) and quantified the average annual PM<sub>2.5</sub> concentrations and OP across different regions of China (Figure 6c).” (Page 16)

24. Line 308. The sentence, “The findings ... and OP” is not needed.

**Response:** Thank you very much for your constructive comments. Following your advice, we have removed this sentence.

25. Line 313. Is the term “urban areas” for low OP meant? Or is this area more rural?

**Response:** Thank you very much for your constructive comments. Based on your previous comments, we have rewritten this conclusion. The detailed revisions in the manuscript are shown below:

“Low PM<sub>2.5</sub> concentrations and Low OP are mainly distributed in northeastern and western China.” (Page 16)

26. Line 318. “northern residents in China right region” does not make sense to me.

**Response:** Thank you very much for your constructive comments. Following your advice, we have removed this sentence. The detailed revisions in the manuscript are shown below:

“Due to high population density, socio-economic activities and winter heating needs, large amounts of anthropogenic emissions, especially from industry, transportation, coal burning and biomass burning, exacerbate PM<sub>2.5</sub> and redox active component pollution.” (Pages 16-17)

27. Lines 336-340. I do not think so many significant digits are needed. I suggest using 85% instead of 84.8%, and likewise for the other numbers used here.

**Response:** Thank you very much for your constructive comments. Following your suggestion, we have reduced the number of significant digits. The detailed revisions in the manuscript are shown below:

“The PDF and CDF results showed that 85% of the total area was above the primary concentrations limit and 40% was above the secondary concentrations limit. In addition, 36% of regions in China have an OP below 1.00 nmol min<sup>-1</sup> m<sup>-3</sup>, 41% have an OP between 1.00 and 2.00 nmol min<sup>-1</sup> m<sup>-3</sup>, and 23% have an OP above 2.00 nmol min<sup>-1</sup> m<sup>-3</sup>.” (Page 18)

28. Line 349. Change to “illustrates”. Line 351. Change to “presents”.



**Response:** Thank you very much for your constructive comments. Based on your suggestion, we have adjusted the tense of the corresponding verbs accordingly. The detailed revisions in the manuscript are shown below:

“Figure 8 illustrates the spatial distribution maps of  $PM_{2.5}$  concentrations and OP under scenarios  $C_1$ ,  $C_2$ , and  $C_3$ . Figure 9a presents the annual average  $PM_{2.5}$  concentrations and OP under different scenarios, and Figure 9b shows the relative contributions of meteorological conditions and emission inventories.” (Page 19)

29. Line 350-351. The sentence is not needed as it repeats the figure caption.

**Response:** Thank you very much for your constructive comments. Following your advice, we have removed this sentence.

30. Line 392. Change “are” to “is”.

**Response:** Thank you very much for your constructive comments. Considering your previous comments, we have rewritten this conclusion. The detailed revisions in the manuscript are shown below:

“It can be seen from Figure 11 that the main reason that secondary aerosol formation is the main anthropogenic source of both  $PM_{2.5}$  concentrations and OP in China is due to the higher pollution levels, more contributions to mass, and toxicity in the central and eastern regions.” (Page 22)

31. Line 430 and line 432. I recommend reducing the number of significant digits.

**Response:** Thank you very much for your constructive comments. Following your suggestion, we have reduced the number of significant digits. The detailed revisions in the manuscript are shown below:

“Secondary aerosol formation, biomass burning, industrial, coal combustion for residential heating, and transportation sources contributed 48%, 21%, 21%, 6% and 4% to  $PM_{2.5}$ , respectively. Secondary aerosol formation, biomass burning, coal combustion for residential heating, industrial sources, and transportation sources contributed 58%, 21%, 11%, 9% and 1% to OP, respectively. This means that secondary aerosol formation and biomass burning are the main sources of  $PM_{2.5}$  and OP.” (Page 21)

## Figures and Tables

1. In all figure captions that show results, please include information on the time period shown (e.g., annual average) and spatial region shown (where appropriate).

**Response:** Thank you very much for your constructive comments. Following your suggestion, we have added the study time, region, and scenarios to the titles of the figures and tables. The detailed revisions in the manuscript are shown below:

“Figure 3. Density scatterplots of model performance and validation for China in scenario  $C_1$  based on (a) annual mean  $PM_{2.5}$  observations from MEE and (b) annual mean  $PM_{2.5}$  derived from the Dalhousie dataset in 2014.” (Page 14 in the manuscript)

“Figure 4. Spatial distribution of the annual mean simulated minus annual mean observed values (a), as well as the spatial distribution of the annual mean simulated values minus the Dalhousie dataset (b) for China in 2014 under scenario  $C_1$ .” (Page 15 in the manuscript)

“Figure 5. Violin plots of monthly average from MEE observations and simulations averaged over various observation stations for China in 2014 under scenario  $C_1$ ; The red and blue colors represent the statistical distribution of simulated and observations, respectively; The width of the violin represents the sample size; The solid black line inside the violin indicates the median. The upper and lower dashed black lines within the violin indicate the upper quartile (the 75th percentile) and lower quartile (the 25th percentile), respectively.” (Page 16 in the manuscript)

“Figure 6. Spatial clustering of annual mean  $PM_{2.5}$  concentrations (a) and annual mean OP (b) in China, annual mean  $PM_{2.5}$  concentrations and annual mean OP (c) in different regions of China in 2014 under scenario  $C_1$ , and geographical location of the study area (d); the central region of China comprises Shanxi, Anhui, Jiangxi, Henan, Hubei, and Hunan provinces; the eastern region of China comprises Beijing, Tianjin, Hebei, Shanghai, Jiangsu, Zhejiang, Fujian, Shandong, Guangdong, Hainan, Hong Kong, Macao, and Taiwan; It should be noted that the eastern region in this study includes Hong Kong, Macao and Taiwan; the western region of China consists of twelve provinces (autonomous regions and municipalities): Inner Mongolia, Guangxi, Chongqing, Sichuan, Guizhou, Yunnan, Tibet, Shaanxi, Gansu, Qinghai, Ningxia and Xinjiang; the northeastern region of China comprises Liaoning, Jilin and Heilongjiang provinces.” (Page 17 in the manuscript)

“Table 2. Goodness-of-fit test results for China in 2014 under scenario  $C_1$ ” (Page 18 in the manuscript)

“Figure 7. Probability distribution of (a) annual mean  $PM_{2.5}$  concentrations and (b) annual mean OP for China in 2014 under scenario  $C_1$ .” (Pages 18-19 in the manuscript)

“Figure 8. Spatial distribution of annual mean  $PM_{2.5}$  concentrations and annual mean OP for China in 2014 under different scenarios; (a)~(c) are  $PM_{2.5}$  concentrations in scenarios  $C_1$ ,  $C_2$  and  $C_3$ , respectively; (d)~(f) is the OP in scenarios  $C_1$ ,  $C_2$ , and  $C_3$ , respectively; The meteorological datasets (emission inventories) employed for scenarios  $C_1$ ,  $C_2$ , and  $C_3$  are ERA5 (EDGAR-HTAP), ERA5 (Eclipse V6), and CESM (Eclipse V6), respectively.” (Page 20 in the manuscript)

“Figure 9. (a) Average annual  $PM_{2.5}$  concentrations and Average annual OP for China in 2014 under different scenarios; (b) The relative contribution of meteorological conditions and emission inventories to Average annual  $PM_{2.5}$  and Average annual OP for China in 2014, with the outer circle representing  $PM_{2.5}$  and the inner circle representing OP; The meteorological datasets (emission inventories) employed for scenarios  $C_1$ ,  $C_2$ , and  $C_3$  are ERA5 (EDGAR-HTAP), ERA5 (Eclipse V6), and CESM (Eclipse V6), respectively.” (Page 21

**in the manuscript)**

“Figure 10. Percentage contribution of different anthropogenic sources (coal combustion for residential heating, biomass burning, secondary aerosol formation, industry, and traffic) to total  $PM_{2.5}$  concentrations and OP for China in 2014 under scenario  $C_1$ .” (Pages 21-22 in the manuscript)

“Figure 11. Spatial distribution of annual mean  $PM_{2.5}$  concentrations and annual mean OP from different anthropogenic sources for China in 2014 under scenario  $C_1$ ; (a)~(e) are  $PM_{2.5}$  concentrations derived from coal combustion for residential heating, biomass burning, secondary aerosol formation, industry, and traffic respectively; (f)~(j) are the OP derived from coal combustion for residential heating, biomass burning, secondary aerosol formation, industry, and traffic respectively.” (Pages 23-24 in the manuscript)

“Figure S1. Density scatterplots of model performance and validation based on monthly mean  $PM_{2.5}$  observations for China in 2014 under scenario  $C_1$ ; (a) to (l) are the results from January to December.” (Page 3 in the supplemental materials)

“Figure S2. Density scatterplots of model performance and validation in scenario  $C_2$  and  $C_3$  for China in 2014; (a) and (b) represent the results in scenario  $C_2$  based on annual mean  $PM_{2.5}$  observations and annual mean  $PM_{2.5}$  derived from the Dalhousie dataset, respectively; (c) and (d) represent the results in scenario  $C_3$  based on annual mean  $PM_{2.5}$  observations and annual mean  $PM_{2.5}$  derived from the Dalhousie dataset, respectively.” (Page 4 in the supplemental materials)

2. Figure 3, figure caption. Please state what parameter is being plotted. I assume  $PM_{2.5}$ , but it should be explicitly stated.

**Response:** Thank you very much for your constructive comments. Following your suggestion, we have clarified the parameters being plotted in the title of Figure 3. The detailed revisions in the manuscript are shown below:

“Figure 3. Density scatterplots of model performance and validation for China in scenario  $C_1$  based on (a) annual mean  $PM_{2.5}$  observations from MEE and (b) annual mean  $PM_{2.5}$  derived from the Dalhousie dataset in 2014.” (Page 14)

3. Figure 3 would benefit from having less white space. I suggest changing the maximum value to 120 or 150  $\mu g/m^3$ .

**Response:** Thank you very much for your constructive comments. Following your suggestion, we have changed the maximum value to 150  $\mu g m^{-3}$ . The detailed revisions in the manuscript are shown below:

“

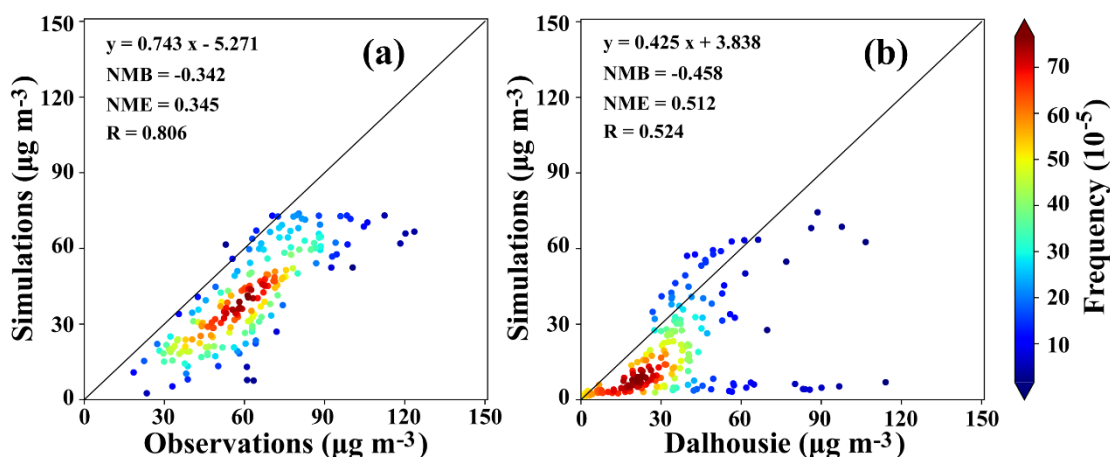

Figure 3. Density scatterplots of model performance and validation for China in scenario C<sub>1</sub> based on (a) annual mean PM<sub>2.5</sub> observations from MEE and (b) annual mean PM<sub>2.5</sub> derived from the Dalhousie dataset in 2014.” (Page 14)

4. Figure 3. Are the points shown in panel b for the Dalhousie dataset for the same locations as the MEE observations? Or are there more points taking advantage of the gridded dataset?

**Response:** Thank you very much for your constructive comments. The points shown in Figure b are different from the MEE observation stations. The data points displayed in Figure b are extracted from the Dalhousie dataset within the Chinese region. In 2014, the observation stations are mainly concentrated in eastern China, while stations in western China are limited. Therefore, in the present study, we also evaluated with the gridded annual-mean global reanalysis Dalhousie surface PM<sub>2.5</sub> dataset, which combines satellite retrievals of aerosol optical depth, chemical transport modeling, and ground-based measurements. The Dalhousie dataset compensated for the non-uniform distribution spatially of observation stations to comprehensively evaluate the performance of the DEHM model.

5. Figure 4. Adjust the colorbar so that the whitest color is zero. That makes it easier to see differences between positive and negative values.

**Response:** Thank you very much for your constructive comments. Following your suggestion, we attempted to adjust the color bar so that the whitest color corresponds to zero. However, the effect was not satisfactory. This is mainly because of the significant difference between the maximum value (positive) and the minimum value (negative). The absolute values of negative values are large, while positive values are small. In this situation, it is challenging to discern the differences between regions. To ensure that readers can more intuitively perceive the deviations across different regions of China, we have chosen to retain the original version. Once again, we appreciate your advice.

6. Figure 5. Are the observations shown in the figure from the MEE data or the Dalhousie reanalysis? Please note this in the figure caption.

**Response:** Thank you very much for your constructive comments. Following your suggestion, we have added a note in the figure caption indicating that the observed values are from the MEE data. The detailed revisions in the manuscript are shown below:

“Figure 5. Violin plots of monthly average from MEE observations and simulations averaged over various observation stations for China in 2014 under scenario C<sub>1</sub>; The red and blue colors represent the statistical

distribution of simulated and observations, respectively; The width of the violin represents the sample size; The solid black line inside the violin indicates the median. The upper and lower dashed black lines within the violin indicate the upper quartile (the 75th percentile) and lower quartile (the 25th percentile), respectively.”  
**(Page 16)**

7. Figure 5. It is difficult to discern the dashed and solid horizontal lines because the solidline does not extend from one edge of the colored region to the other. Is it possible tofix this?

**Response:** Thank you very much for your constructive comments. Following your suggestion, we have extended the solid lines from one edge of the colored region to the other edge. The detailed revisions in the manuscript are shown below:

“

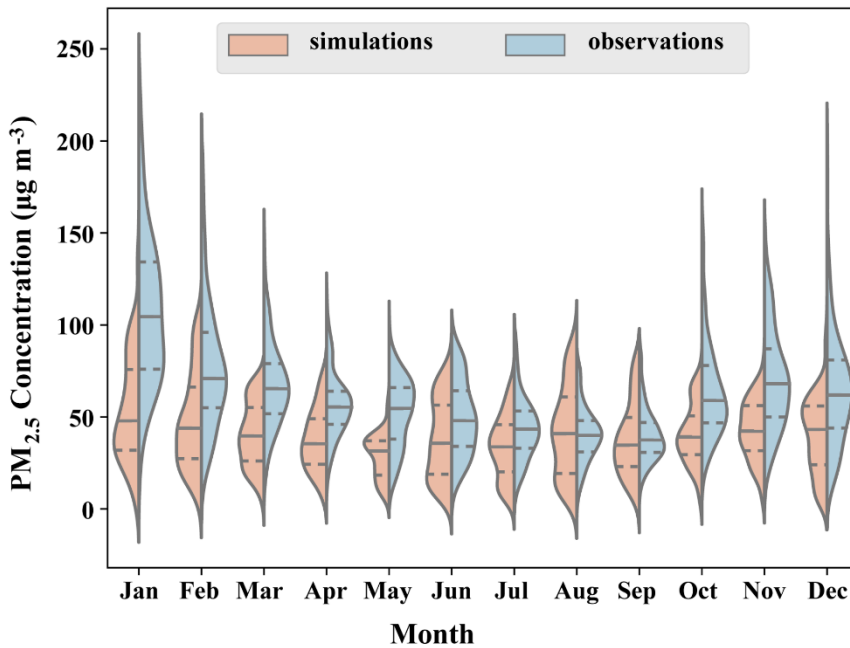

Figure 5. Violin plots of monthly average from MEE observations and simulations averaged over various observation stations for China in 2014 under scenario C<sub>1</sub>; The red and blue colors represent the statistical distribution of simulated and observations, respectively; The width of the violin represents the sample size; The solid black line inside the violin indicates the median. The upper and lower dashed black lines within the violin indicate the upper quartile (the 75th percentile) and lower quartile (the 25th percentile), respectively.”  
**(Page 16)**

8. Figure 8. Using 2 rows and 3 columns makes for smaller panels. I suggest using 3 rows and 2 columns (transposing the panels). I also suggest adding titles for each column, “PM<sub>2.5</sub> (units)” and “OP (units)” and then panel labels that simply are the simulation name.

**Response:** Thank you very much for your constructive comments. Following your suggestion, we arranged the spatial distribution maps of annual average PM<sub>2.5</sub> concentration and annual average OP for different scenarios in China for the year 2014 in a layout of 3 rows and 2 columns. We have also added titles to each column. The detailed revisions in the manuscript are shown below:

“

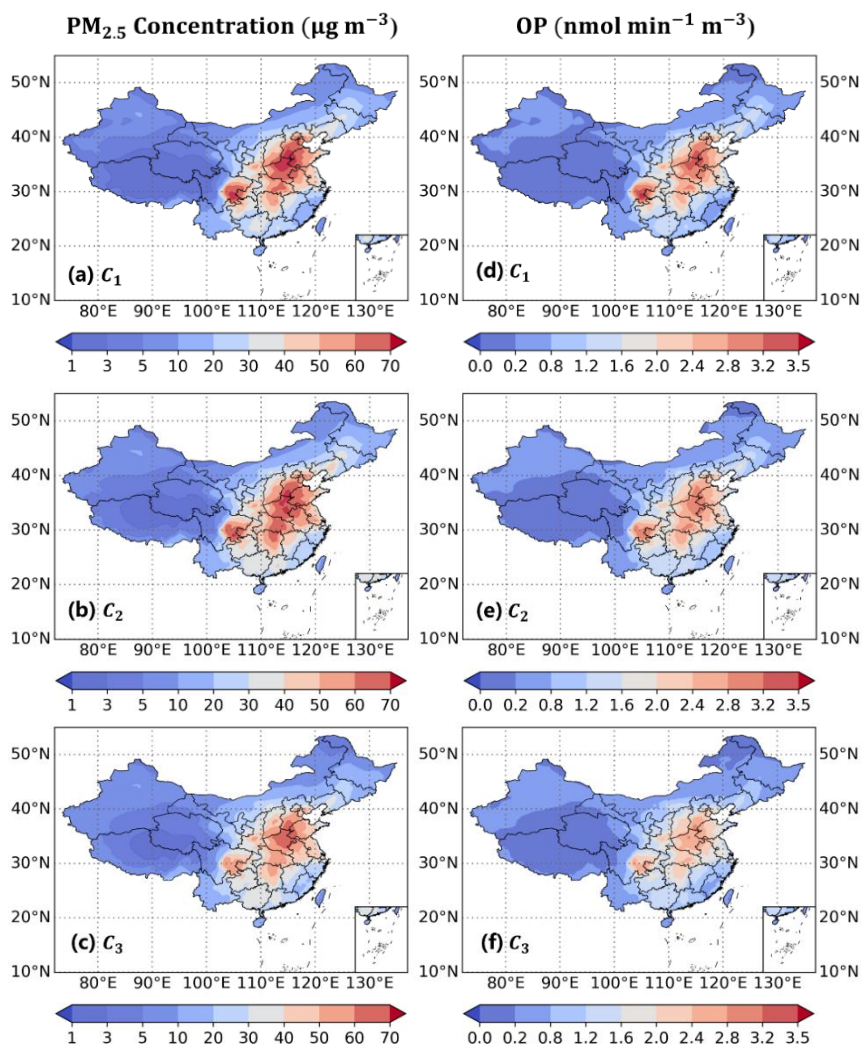

Figure 8. Spatial distribution of annual mean  $PM_{2.5}$  concentrations and annual mean OP for China in 2014 under different scenarios; (a)~(c) are  $PM_{2.5}$  concentrations in scenarios  $C_1$ ,  $C_2$  and  $C_3$ , respectively; (d)~(f) is the OP in scenarios  $C_1$ ,  $C_2$ , and  $C_3$ , respectively; The meteorological datasets (emission inventories) employed for scenarios  $C_1$ ,  $C_2$ , and  $C_3$  are ERA5 (EDGAR-HTAP), ERA5 (Eclipse V6), and CESM (Eclipse V6), respectively.” (Page 20)

9. Figure 8. What are the insets showing in the bottom right of each panel? They are not discussed, so I suggest removing them.

**Response:** Thank you very much for your constructive comments. This study was conducted on the entire China region, and the inset maps in the bottom right corner of each panel represent zoomed-in portions of the China map. This is a standardized approach for studies involving the map of China, and its presence is necessary. Therefore, we have retained the inset maps in the bottom right corner. We appreciate your comment.

10. Figure 10. Like Figure 8, I suggest using 5 rows and 2 columns instead of 4 rows and 3 columns. I also suggest adding titles for each column, “ $PM_{2.5}$  (units)” and “OP (units)” and then panel labels are the sector source (e.g., residential heating).

**Response:** Thank you very much for your constructive comments. Following your suggestion, we have organized the spatial distribution maps of annual average  $PM_{2.5}$  concentrations and annual average OP for

different sectors in China for the year 2014 into a layout of 5 rows and 2 columns. Additionally, we have added titles for each column. The detailed revisions in the manuscript are shown below:

“

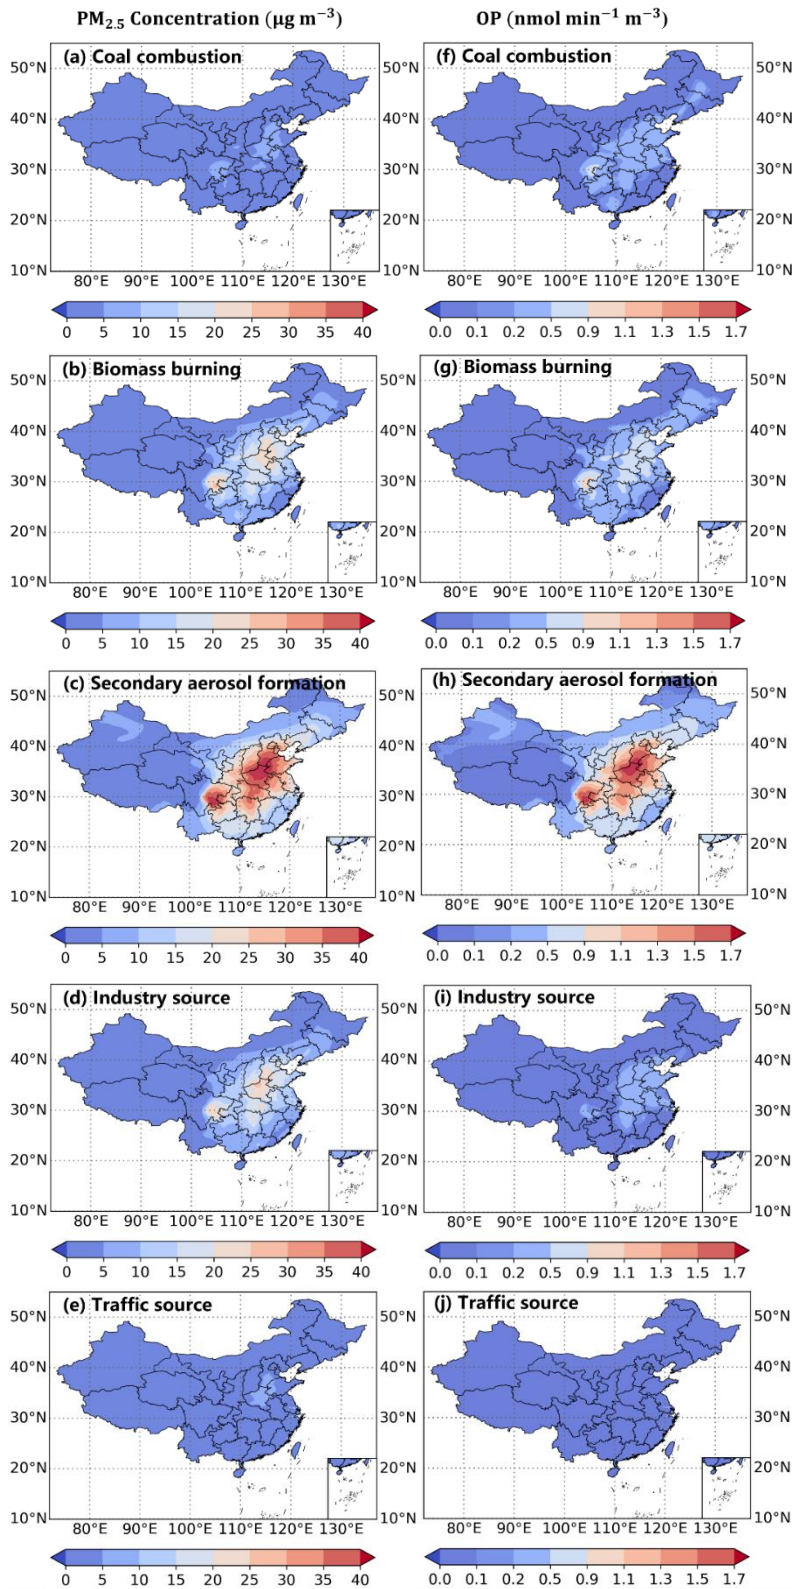

Figure 11. Spatial distribution of annual mean  $PM_{2.5}$  concentrations and annual mean OP from different anthropogenic sources for China in 2014 under scenario  $C_1$ ; (a)~(e) are  $PM_{2.5}$  concentrations derived from

coal combustion for residential heating, biomass burning, secondary aerosol formation, industry, and traffic respectively; (f)~(j) are the OP derived from coal combustion for residential heating, biomass burning, secondary aerosol formation, industry, and traffic respectively.” (Pages 23-24)

11. Figure 11. A more complete figure caption is needed: Percent contribution of different anthropogenic sources (traffic, industry, secondary aerosol formation, biomass burning, coal combustion) to total PM<sub>2.5</sub> concentration and oxidation potential.

**Response:** Thank you very much for your constructive comments. Following your suggestion, we have refined the captions for the figures. The detailed revisions in the manuscript are shown below:

“Figure 10. Percentage contribution of different anthropogenic sources (coal combustion for residential heating, biomass burning, secondary aerosol formation, industry, and traffic) to total PM<sub>2.5</sub> concentrations and OP for China in 2014 under scenario C<sub>1</sub>.” (Page 22)

## References

Yang, F., C. Liu, H. Qian, Comparison of indoor and outdoor oxidative potential of PM<sub>2.5</sub>: pollution levels, temporal patterns, and key constituents, *Environment International*, **155**, 2021, <https://doi.org/10.1016/j.envint.2021.106684>.
